# Supplementary material
Source: HighWire-hosted journal article supplement (doi:10.1101/rna.071324.119)
Supplement: Supplemental_File_1_genus.xlsx [file Supplemental_File_1_genus.xlsx]

## Sheet: elegans
chromosome	start	end	strand	count	score	length	feature	nearest_feature	distance	gene	type	chromatin_state_ee	chromatin_state_l3	telomeric_sRNA_0_mismatches	telomeric_sRNA_1_mismatches	telomeric_sRNA_2_mismatches	telomeric_sRNA_3_mismatches	all_small_RNAs	ID
I	576	846	-	28	91.1	270	intergenic	ncrna	2900	Y74C9A.6	snoRNA	Polycomb	Polycomb	0	0	2	4	7	ITS_1
I	256072	256120	+	6	95.8	48	intron	intron	0	Y48G1BR.1	protein_coding	Low signal	Low signal	0	0	0	0	0	ITS_2
I	261908	261938	+	4	90	30	intergenic	ncrna	1563	T13E5.1	snoRNA	Low signal	Low signal	0	1	0	0	2	ITS_3
I	391374	391440	-	4	86.4	66	intron	intron	0	R119.5	protein_coding	Gene body	Gene body	0	0	0	0	2	ITS_4
I	409689	409743	-	4	90.7	54	intron	intron	0	otub-2	protein_coding	Gene body	Gene body	0	0	0	0	0	ITS_5
I	428817	428859	-	4	92.9	42	intergenic	3' UTR	5099	C07F11.2	protein_coding	Low signal	Enhancer	0	0	0	0	0	ITS_6
I	477865	478058	+	15	89.6	193	intron	intron	0	cutl-13	protein_coding	Enhancer	Heterochromatin	0	0	0	0	0	ITS_7
I	486091	486145	+	4	90.7	54	intron	intron	0	W04C9.6	protein_coding	Gene body	Heterochromatin	0	0	0	1	1	ITS_8
I	556970	557154	-	14	79.1	184	intergenic	5' UTR	276	lpr-1	protein_coding	Polycomb	Enhancer	0	0	0	0	3	ITS_9
I	566942	567092	+	14	88.7	150	intergenic	exon	551	ceh-9	protein_coding	Polycomb	Polycomb	0	0	0	0	0	ITS_10
I	640913	641027	-	8	86.8	114	intron	intron	0	Y65B4A.2	protein_coding	Polycomb	Heterochromatin	0	0	0	0	3	ITS_11
I	669651	669915	+	6	26.8	264	intron	intron	0	Y18H1A.14	protein_coding	Heterochromatin	Polycomb	0	0	0	0	23	ITS_12
I	683538	683762	+	15	76.8	224	3' UTR	3' UTR	0	hasp-2	protein_coding	Low signal	Heterochromatin	0	0	1	1	13	ITS_13
I	715428	715458	-	4	96.7	30	intron	intron	0	hgap-1	protein_coding	Gene body	Gene body	0	0	0	0	3	ITS_14
I	727241	727283	+	6	97.6	42	intron	intron	0	pif-1	protein_coding	Gene body	Heterochromatin	0	0	1	0	3	ITS_15
I	742129	742458	-	23	85.8	329	intron	ncrna	0	Y18H1A.17	ncRNA	Low signal	Polycomb	0	1	0	0	1	ITS_16
I	745996	746471	+	31	85	475	intron	intron	0	col-47	protein_coding	Polycomb	Polycomb	0	0	0	1	1	ITS_17
I	748632	749111	+	8	60.1	479	intron	intron	0	Y18H1A.9	protein_coding	Polycomb	Polycomb	0	0	0	0	1	ITS_18
I	757539	757616	+	9	89.7	77	ncrna	ncrna	0	Y18H1A.16	ncRNA	Low signal	Enhancer	0	0	0	0	0	ITS_19
I	757787	757817	+	5	100	30	intergenic	ncrna	169	Y18H1A.16	ncRNA	Low signal	Low signal	0	0	0	0	0	ITS_20
I	775597	776075	+	28	81.8	478	intron	intron	0	T06A4.1	protein_coding	Polycomb	Polycomb	0	0	0	0	0	ITS_21
I	779158	779344	-	21	94.1	186	intergenic	ncrna	0	T06A4.6	ncRNA	Low signal	Polycomb	0	0	0	0	1	ITS_22
I	784528	784965	+	29	85.7	437	intergenic	ncrna	3131	T06A4.7	ncRNA	Gene body	Polycomb	0	2	1	6	14	ITS_23
I	801973	802198	-	14	79.1	225	intergenic	ncrna	275	Y73A3A.2	ncRNA	Gene body	Polycomb	0	0	0	0	3	ITS_24
I	806381	806657	-	20	89.1	276	intron	ncrna	0	ZC123.10	ncRNA	Gene body	Polycomb	0	0	0	0	2	ITS_25
I	814459	814651	+	19	92.2	192	intron	intron	0	zfh-2	protein_coding	Polycomb	Polycomb	0	0	0	1	1	ITS_26
I	829017	829353	-	19	68.2	336	intron	intron	0	zfh-2	protein_coding	Polycomb	Polycomb	1	0	0	0	1	ITS_27
I	833517	833841	+	28	88	324	intron	intron	0	zfh-2	protein_coding	Polycomb	Gene body	0	0	0	0	0	ITS_28
I	833973	834297	+	28	87.7	324	intron	intron	0	zfh-2	protein_coding	Polycomb	Gene body	0	0	0	0	2	ITS_29
I	834424	834478	+	7	96.3	54	intron	ncrna	0	ZC123.6	ncRNA	Polycomb	Gene body	0	0	0	0	0	ITS_30
I	846171	846411	+	22	89.2	240	intron	intron	0	Y95B8A.17	ncRNA	Polycomb	Gene body	2	4	5	0	15	ITS_31
I	883731	883864	+	4	55.6	133	intron	intron	0	Y95B8A.6	protein_coding	Gene body	Gene body	0	0	0	0	6	ITS_32
I	885366	885554	+	12	84.9	188	intron	intron	0	Y95B8A.6	protein_coding	Low signal	Enhancer	0	0	1	0	6	ITS_33
I	885997	886116	-	8	69.6	119	intron	intron	0	Y95B8A.6	protein_coding	Low signal	Polycomb	0	0	0	0	2	ITS_34
I	915182	915446	-	25	87.9	264	intron	intron	0	Y95B8A.12	protein_coding	Polycomb	Polycomb	0	0	0	0	0	ITS_35
I	915560	915860	-	27	87.3	300	intron	intron	0	Y95B8A.12	protein_coding	Polycomb	Polycomb	0	0	2	0	5	ITS_36
I	927272	927601	+	17	86.7	329	intergenic	exon	395	Y95B8A.12	protein_coding	Low signal	Polycomb	0	0	0	0	0	ITS_37
I	939762	939852	+	10	93.3	90	intron	intron	0	Y95B8A.2	protein_coding	Low signal	Low signal	0	0	0	0	0	ITS_38
I	940045	940123	+	8	92.3	78	intron	intron	0	Y95B8A.2	protein_coding	Low signal	Low signal	0	0	0	0	0	ITS_39
I	940701	940875	+	15	85.6	174	intron	intron	0	Y95B8A.2	protein_coding	Low signal	Low signal	0	0	0	0	0	ITS_40
I	942535	942755	-	14	70.8	220	intron	ncrna	0	Y95B8A.15	ncRNA	Low signal	Low signal	0	0	0	0	0	ITS_41
I	943055	943134	-	4	62.4	79	intron	intron	0	nas-30	protein_coding	Low signal	Polycomb	0	0	0	0	0	ITS_42
I	943289	943403	-	9	90.4	114	intron	intron	0	nas-30	protein_coding	Low signal	Polycomb	0	0	0	0	1	ITS_43
I	968743	969055	-	21	78.3	312	intron	intron	0	cutl-20	protein_coding	Gene body	Polycomb	0	0	0	2	5	ITS_44
I	974792	974852	+	5	88.3	60	intron	intron	0	shc-1	protein_coding	Low signal	Low signal	0	0	0	0	0	ITS_45
I	975932	976039	-	10	85.2	107	intron	intron	0	shc-1	protein_coding	Low signal	Low signal	0	0	0	0	1	ITS_46
I	978937	979270	+	29	87.4	333	intergenic	ncrna	0	F54A5.5	ncRNA	Low signal	Polycomb	0	0	0	0	1	ITS_47
I	993608	993771	+	4	48.5	163	intergenic	3' UTR	1445	hmbx-1	protein_coding	Low signal	Enhancer	0	0	0	0	0	ITS_48
I	995137	995374	-	4	48.1	237	intergenic	exon	670	C54G6.3	protein_coding	Low signal	Enhancer	0	0	0	0	2	ITS_49
I	999981	1000029	+	5	91.7	48	intron	intron	0	C54G6.3	protein_coding	Polycomb	Enhancer	0	0	0	0	0	ITS_50
I	1000381	1000619	-	23	89.2	238	intron	intron	0	C54G6.3	protein_coding	Polycomb	Enhancer	0	0	0	0	0	ITS_51
I	1126727	1126900	-	17	90.2	173	intergenic	ncrna	74	ZK993.4	ncRNA	Enhancer	Polycomb	0	0	0	0	4	ITS_52
I	1267292	1267469	+	6	51.1	177	intron	intron	0	grh-1	protein_coding	Polycomb	Gene body	0	0	0	0	1	ITS_53
I	1291986	1292146	+	11	84	160	intergenic	3' UTR	4027	Y48G8AR.3	protein_coding	Low signal	Enhancer	1	0	3	2	18	ITS_54
I	1316079	1316355	-	16	85.5	276	intron	intron	0	dapk-1	protein_coding	Gene body	Gene body	0	0	0	0	1	ITS_55
I	1378611	1378743	-	5	81.8	132	intron	intron	0	Y92H12BL.4	protein_coding	Gene body	Gene body	0	0	0	1	1	ITS_56
I	1475094	1475160	-	8	93.9	66	intron	intron	0	acs-16	protein_coding	Low signal	Low signal	0	0	0	0	0	ITS_57
I	1475262	1475294	-	4	86.1	32	intron	intron	0	acs-16	protein_coding	Low signal	Low signal	0	0	2	0	3	ITS_58
I	1653218	1653368	-	10	78.7	150	intron	intron	0	Y71G12B.18	protein_coding	Low signal	Low signal	0	0	0	0	0	ITS_59
I	1974471	1975116	-	38	81.9	645	intergenic	ncrna	0	Y51F10.12	ncRNA	Gene body	Polycomb	0	11	104	143	1012	ITS_60
I	2215899	2216013	-	8	86	114	intergenic	5' UTR	86	W03F11.5	protein_coding	Enhancer	Polycomb	0	1	1	1	4	ITS_61
I	2222005	2222035	-	4	96.7	30	intron	intron	0	W03F11.1	protein_coding	Gene body	Polycomb	0	0	0	0	0	ITS_62
I	2223951	2224155	+	15	87.3	204	intron	intron	0	gcy-17	protein_coding	Gene body	Polycomb	0	0	0	0	0	ITS_63
I	2245787	2246064	-	17	83.4	277	intron	intron	0	lgc-51	protein_coding	Low signal	Polycomb	0	0	0	0	0	ITS_64
I	2251025	2251239	+	6	45.3	214	intron	intron	0	slc-17.6	protein_coding	Low signal	Low signal	0	0	0	0	6	ITS_65
I	2256624	2256702	-	8	92.3	78	intron	intron	0	abt-2	protein_coding	Low signal	Low signal	0	1	0	0	1	ITS_66
I	2261989	2262271	-	23	86.6	282	intron	intron	0	abt-2	protein_coding	Gene body	Polycomb	1	0	2	1	6	ITS_67
I	2269390	2269491	+	10	92.2	101	intron	ncrna	0	Y39G10AL.6	ncRNA	Gene body	Gene body	0	0	1	0	1	ITS_68
I	2276583	2276637	+	6	92.6	54	intergenic	5' UTR	3196	Y39G10AL.1	protein_coding	Enhancer	Enhancer	0	1	1	0	2	ITS_69
I	2328734	2328818	-	6	89.3	84	intron	intron	0	srbc-64	protein_coding	Polycomb	Heterochromatin	0	0	1	0	5	ITS_70
I	2329513	2329729	+	13	74	216	intron	intron	0	srbc-64	protein_coding	Polycomb	Heterochromatin	0	0	0	0	1	ITS_71
I	2365328	2365376	+	5	93.8	48	intron	intron	0	nekl-1	protein_coding	Gene body	Heterochromatin	0	0	0	0	0	ITS_72
I	2368252	2368567	+	5	47	315	intron	intron	0	nekl-1	protein_coding	Enhancer	Polycomb	0	0	0	0	6	ITS_73
I	2368691	2368859	+	13	88.1	168	intron	ncrna	0	Y39G10AR.29	ncRNA	Gene body	Polycomb	0	1	0	0	1	ITS_74
I	2370725	2370875	-	14	88	150	intron	ncrna	0	Y39G10AR.27	ncRNA	Low signal	Polycomb	0	0	0	0	0	ITS_75
I	2413086	2413224	-	6	87	138	intergenic	exon	1908	F23C8.13	protein_coding	Gene body	Enhancer	0	0	0	0	1	ITS_76
I	2414731	2414964	+	14	83.7	233	intergenic	exon	168	F23C8.13	protein_coding	Low signal	Polycomb	0	0	0	0	3	ITS_77
I	2459081	2459159	+	4	79.5	78	intron	intron	0	inx-19	protein_coding	Enhancer	Low signal	0	0	1	0	6	ITS_78
I	2462510	2462606	+	7	87.5	96	intron	intron	0	inx-19	protein_coding	Enhancer	Polycomb	0	1	0	0	2	ITS_79
I	2482851	2483030	-	12	84.4	179	intron	intron	0	abtm-1	protein_coding	Gene body	Gene body	0	0	0	0	0	ITS_80
I	2571430	2571556	+	12	88.9	126	intergenic	3' UTR	219	aat-5	protein_coding	Low signal	Low signal	0	0	1	1	3	ITS_81
I	2656754	2657012	+	18	86	258	intron	intron	0	F40E3.8	ncRNA	Low signal	Enhancer	0	0	1	0	2	ITS_82
I	2666183	2666303	+	10	88.3	120	intergenic	ncrna	80	F32B5.17	snoRNA	Gene body	Enhancer	0	0	0	0	0	ITS_83
I	2669230	2669440	+	11	82.4	210	intron	intron	0	F32B5.6	protein_coding	Polycomb	Gene body	0	0	1	0	1	ITS_84
I	2673545	2673641	+	9	89.6	96	intron	intron	0	F32B5.7	protein_coding	Low signal	Enhancer	0	0	1	1	2	ITS_85
I	2699383	2699473	-	6	87.8	90	intron	intron	0	F32B5.2	protein_coding	Low signal	Polycomb	0	0	0	0	0	ITS_86
I	2740359	2740638	+	10	71.1	279	intron	intron	0	lron-11	protein_coding	Enhancer	Gene body	0	1	0	0	9	ITS_87
I	2799611	2799670	+	5	85	59	intron	intron	0	W03D8.12	ncRNA	Polycomb	Polycomb	0	0	0	0	0	ITS_88
I	2816992	2817088	-	5	86.5	96	intron	intron	0	W03D8.5	protein_coding	Low signal	Polycomb	0	0	1	0	1	ITS_89
I	2840215	2840316	+	9	86.4	101	intergenic	ncrna	2165	W10C8.11	ncRNA	Enhancer	Enhancer	0	0	0	0	1	ITS_90
I	2858092	2858120	-	4	93.3	28	intergenic	3' UTR	478	W10C8.6	protein_coding	Enhancer	Enhancer	0	0	0	0	1	ITS_91
I	2924552	2924585	+	4	65.9	33	intron	intron	0	parp-1	protein_coding	Gene body	Gene body	0	0	0	0	18	ITS_92
I	2966765	2967370	+	37	84.7	605	intergenic	ncrna	245	Y71F9AR.7	ncRNA	Enhancer	Enhancer	0	0	4	11	23	ITS_93
I	3042826	3042970	-	13	91	144	intron	intron	0	mod-5	protein_coding	Low signal	Polycomb	0	0	1	0	1	ITS_94
I	3115943	3116255	-	23	88.5	312	intron	ncrna	0	C45E1.8	ncRNA	Low signal	Gene body	0	0	0	0	1	ITS_95
I	3137528	3137775	+	21	85.7	247	intron	intron	0	col-49	protein_coding	Polycomb	Polycomb	0	0	0	0	2	ITS_96
I	3256629	3256899	-	12	78.7	270	intergenic	ncrna	0	Y54E10A.28	ncRNA	Low signal	Polycomb	0	0	1	0	9	ITS_97
I	3258608	3259052	-	39	91.9	444	intergenic	ncrna	0	Y54E10A.22	ncRNA	Low signal	Polycomb	0	0	7	3	11	ITS_98
I	3259310	3259382	-	9	93.1	72	intergenic	ncrna	221	Y54E10A.22	ncRNA	Low signal	Polycomb	0	0	0	0	1	ITS_99
I	3270549	3270827	+	7	54.3	278	intron	intron	0	pqn-72	protein_coding	Enhancer	Gene body	0	0	0	1	13	ITS_100
I	3272829	3272984	+	9	82.7	155	intron	intron	0	pqn-72	protein_coding	Polycomb	Polycomb	0	0	0	2	11	ITS_101
I	3280163	3280253	+	9	91.1	90	intron	intron	0	W01B11.7	ncRNA	Low signal	Low signal	0	0	0	0	0	ITS_102
I	3281403	3281622	+	13	83	219	intergenic	5' UTR	520	pqn-72	protein_coding	Low signal	Low signal	0	0	0	0	1	ITS_103
I	3384969	3385071	+	9	90.2	102	intron	ncrna	0	F25F1.4	ncRNA	Low signal	Enhancer	0	0	0	0	0	ITS_104
I	3402257	3402323	+	5	89.4	66	intron	intron	0	K03E5.7	ncRNA	Polycomb	Low signal	0	0	1	0	1	ITS_105
I	3425526	3425590	+	7	86.4	64	intergenic	3' UTR	1315	K03E5.2	protein_coding	Low signal	Low signal	0	0	0	0	0	ITS_106
I	3625943	3626039	+	4	84.4	96	intergenic	exon	856	Y47G6A.32	protein_coding	Low signal	Enhancer	0	0	0	0	0	ITS_107
I	4234590	4234669	-	6	84.8	79	intron	intron	0	nab-1	protein_coding	Low signal	Gene body	0	0	0	0	2	ITS_108
I	4550181	4550227	-	4	85.4	46	intergenic	exon	250	Y119C1B.3	protein_coding	Low signal	Low signal	0	0	0	0	0	ITS_109
I	4888935	4889025	-	6	85.6	90	intron	intron	0	F25F8.1	protein_coding	Low signal	Enhancer	0	0	0	0	0	ITS_110
I	5381748	5381846	+	4	68.5	98	intron	intron	0	C24A11.2	protein_coding	Low signal	Enhancer	0	1	0	0	2	ITS_111
I	5391148	5391196	-	4	87.5	48	intergenic	ncrna	2228	21ur-14736	piRNA	Low signal	Enhancer	0	0	0	0	0	ITS_112
I	5640828	5641019	+	4	50	191	intergenic	5' UTR	2247	M01A12.4	protein_coding	Polycomb	Polycomb	0	0	0	0	113	ITS_113
I	7035222	7035264	+	4	88.1	42	intergenic	ncrna	86	21ur-15531	piRNA	Low signal	Enhancer	0	0	0	0	0	ITS_114
I	10404525	10404644	+	8	90	119	intergenic	ncrna	1484	F25D7.8	ncRNA	Enhancer	Enhancer	0	0	0	2	4	ITS_115
I	10645802	10645874	+	6	81.9	72	intergenic	3' UTR	185	tag-344	protein_coding	Low signal	Low signal	0	0	0	0	2	ITS_116
I	10711270	10711318	-	4	83.3	48	intergenic	3' UTR	895	B0205.10	protein_coding	Low signal	Low signal	0	1	2	2	18	ITS_117
I	10860094	10860191	+	4	60.6	97	intron	intron	0	Y37F4.1	protein_coding	Polycomb	Polycomb	0	0	0	0	0	ITS_118
I	10867985	10868045	-	8	95	60	intron	ncrna	0	Y37F4.14	ncRNA	Low signal	Polycomb	0	1	0	0	1	ITS_119
I	10921654	10921708	-	4	88.9	54	intron	intron	0	F49D11.2	protein_coding	Low signal	Polycomb	0	0	0	0	0	ITS_120
I	10926433	10926526	+	5	76	93	intergenic	3' UTR	359	F49D11.10	protein_coding	Low signal	Enhancer	0	0	0	0	1	ITS_121
I	10926614	10926734	-	8	79.2	120	intergenic	3' UTR	151	F49D11.10	protein_coding	Low signal	Enhancer	0	1	1	2	6	ITS_122
I	11010807	11011128	+	17	79.5	321	intergenic	3' UTR	212	Y52B11A.20	protein_coding	Gene body	Polycomb	0	0	0	0	4	ITS_123
I	11030792	11030894	+	7	88.2	102	intergenic	5' UTR	1446	Y52B11A.8	protein_coding	Heterochromatin	Polycomb	0	0	1	1	5	ITS_124
I	11210316	11210456	+	10	85	140	intron	intron	0	ztf-6	protein_coding	Gene body	Gene body	0	0	0	1	2	ITS_125
I	11234851	11234912	+	4	83.6	61	intron	intron	0	clec-100	protein_coding	Heterochromatin	Heterochromatin	0	0	0	0	0	ITS_126
I	11244209	11244545	+	23	84.8	336	intron	intron	0	F46A8.12	ncRNA	Heterochromatin	Heterochromatin	0	0	1	0	8	ITS_127
I	11256071	11256257	+	17	87.6	186	intergenic	exon	188	scrm-6	protein_coding	Polycomb	Heterochromatin	0	0	0	4	7	ITS_128
I	11313658	11313889	+	5	33.9	231	intron	intron	0	hxk-2	protein_coding	Gene body	Polycomb	0	0	0	0	2	ITS_129
I	11314011	11314146	+	4	37.2	135	intron	intron	0	hxk-2	protein_coding	Gene body	Gene body	0	0	0	0	0	ITS_130
I	11314364	11314854	+	8	34.9	490	intron	intron	0	hxk-2	protein_coding	Gene body	Gene body	0	0	0	0	0	ITS_131
I	11341106	11341300	+	13	83.8	194	intron	intron	0	M04D5.3	protein_coding	Heterochromatin	Heterochromatin	0	0	2	0	3	ITS_132
I	11369787	11370317	+	19	33.5	530	intron	intron	0	F56G4.6	protein_coding	Low signal	Low signal	0	0	0	0	4	ITS_133
I	11389466	11389697	+	5	37.7	231	intron	intron	0	aat-9	protein_coding	Gene body	Low signal	0	0	0	0	6	ITS_134
I	11401273	11401513	-	5	31.4	240	intron	intron	0	ego-2	protein_coding	Gene body	Gene body	0	0	0	0	2	ITS_135
I	11401628	11402248	-	17	42.8	620	intron	intron	0	ego-2	protein_coding	Gene body	Gene body	0	0	0	0	18	ITS_136
I	11411126	11411162	-	4	88.9	36	intron	intron	0	ego-2	protein_coding	Gene body	Gene body	0	0	0	0	1	ITS_137
I	11428656	11428776	-	8	85	120	ncrna	ncrna	0	C27C7.12	ncRNA	Polycomb	Polycomb	0	0	0	0	0	ITS_138
I	11429338	11429622	+	21	83.8	284	intron	ncrna	0	C27C7.13	ncRNA	Polycomb	Polycomb	0	0	0	0	1	ITS_139
I	11450370	11450514	-	16	88.2	144	intron	ncrna	0	ZK1025.18	ncRNA	Heterochromatin	Polycomb	2	0	1	0	15	ITS_140
I	11451205	11451331	+	13	91.3	126	intron	intron	0	ZK1025.14	ncRNA	Heterochromatin	Polycomb	0	0	0	1	2	ITS_141
I	11454647	11454713	-	5	86.4	66	intergenic	peseudogene_exon	43	ZK1025.5	pseudogene	Heterochromatin	Heterochromatin	0	0	0	4	8	ITS_142
I	11457112	11457449	+	20	80.5	337	intron	ncrna	0	ZK1025.13	ncRNA	Polycomb	Heterochromatin	0	0	0	0	0	ITS_143
I	11463357	11463487	-	7	84.8	130	intergenic	5' UTR	289	ZK1025.3	protein_coding	Polycomb	Heterochromatin	0	0	0	0	0	ITS_144
I	11466024	11466060	+	5	97.2	36	intron	intron	0	bah-1	protein_coding	Heterochromatin	Heterochromatin	0	0	0	0	0	ITS_145
I	11466720	11466786	+	5	86.4	66	intron	intron	0	bah-1	protein_coding	Heterochromatin	Heterochromatin	0	0	0	0	5	ITS_146
I	11470102	11470228	-	13	91.3	126	intron	ncrna	0	ZK1025.15	ncRNA	Heterochromatin	Heterochromatin	0	0	1	1	3	ITS_147
I	11470919	11471069	+	17	88.7	150	intron	ncrna	0	ZK1025.19	ncRNA	Heterochromatin	Polycomb	3	0	0	0	11	ITS_148
I	11484921	11485071	+	4	72.7	150	intron	intron	0	K08C9.1	protein_coding	Gene body	Heterochromatin	0	0	0	0	0	ITS_149
I	11490953	11491326	-	25	83.4	373	intergenic	exon	393	col-65	protein_coding	Heterochromatin	Heterochromatin	0	0	0	1	2	ITS_150
I	11540242	11540362	-	7	83.3	120	intron	intron	0	dys-1	protein_coding	Gene body	Gene body	0	0	0	0	0	ITS_151
I	11540476	11540680	-	13	83.8	204	intron	intron	0	dys-1	protein_coding	Gene body	Gene body	0	0	0	0	0	ITS_152
I	11542344	11542583	-	16	86.2	239	intron	intron	0	dys-1	protein_coding	Gene body	Gene body	0	1	1	0	2	ITS_153
I	11543508	11543556	-	4	91.7	48	intron	intron	0	dys-1	protein_coding	Gene body	Gene body	0	0	2	0	2	ITS_154
I	11564980	11565040	+	5	86.7	60	intergenic	5' UTR	197	F15D3.4	protein_coding	Polycomb	Polycomb	0	0	0	3	17	ITS_155
I	11567074	11567134	+	5	90	60	intron	intron	0	F15D3.4	protein_coding	Polycomb	Polycomb	0	0	1	0	1	ITS_156
I	11567483	11567633	+	14	92	150	intron	ncrna	0	F15D3.11	ncRNA	Polycomb	Polycomb	1	0	0	0	1	ITS_157
I	11571586	11572037	+	16	65.7	451	intergenic	3' UTR	52	F15D3.6	protein_coding	Low signal	Polycomb	0	0	0	0	60	ITS_158
I	11621155	11621281	-	10	84.9	126	ncrna	ncrna	0	C17D12.16	ncRNA	Polycomb	Polycomb	0	0	0	1	1	ITS_159
I	11622094	11622220	+	10	84.9	126	intergenic	exon	195	C17D12.9	protein_coding	Polycomb	Polycomb	0	0	0	1	2	ITS_160
I	11634956	11635074	+	4	75.4	118	intron	intron	0	W04G5.5	protein_coding	Heterochromatin	Heterochromatin	0	0	0	0	0	ITS_161
I	11639219	11639411	+	10	81.2	192	intron	intron	0	W04G5.15	ncRNA	Heterochromatin	Heterochromatin	0	0	0	0	0	ITS_162
I	11656276	11656426	+	6	86	150	intergenic	exon	2022	W04G5.7	protein_coding	Polycomb	Polycomb	0	0	0	1	2	ITS_163
I	11788159	11788443	+	14	76.2	284	intron	intron	0	vab-10	protein_coding	Gene body	Gene body	0	0	0	0	1	ITS_164
I	11880699	11880741	+	4	90.5	42	intron	intron	0	dnj-27	protein_coding	Gene body	Gene body	0	0	0	0	1	ITS_165
I	11895099	11895153	+	4	85.5	54	intron	intron	0	Y47H9C.8	protein_coding	Gene body	Gene body	0	0	0	0	4	ITS_166
I	11933354	11933567	+	24	92.1	213	intergenic	ncrna	0	R06C1.14	ncRNA	Gene body	Enhancer	0	0	1	3	6	ITS_167
I	11934543	11934792	+	15	81.4	249	intergenic	ncrna	968	R06C1.10	ncRNA	Gene body	Enhancer	0	0	3	3	9	ITS_168
I	11948510	11948722	+	10	83.8	212	intron	intron	0	R06C1.6	protein_coding	Low signal	Low signal	0	0	0	0	5	ITS_169
I	11949801	11949886	+	8	88.2	85	intron	ncrna	0	R06C1.12	ncRNA	Polycomb	Gene body	0	0	0	0	0	ITS_170
I	11951143	11951328	+	12	83.9	185	intron	intron	0	R06C1.6	protein_coding	Polycomb	Gene body	0	0	0	0	1	ITS_171
I	11984231	11984369	-	11	87.7	138	intron	ncrna	0	Y53C10A.19	ncRNA	Gene body	Gene body	0	0	0	0	0	ITS_172
I	12028800	12028950	+	9	86.8	150	intergenic	3' UTR	487	Y53C10A.10	protein_coding	Low signal	Polycomb	0	0	0	0	1	ITS_173
I	12029558	12029702	+	10	86.1	144	intergenic	3' UTR	224	F58D5.8	protein_coding	Low signal	Polycomb	0	0	1	0	1	ITS_174
I	12039446	12039601	-	5	78.6	155	intergenic	5' UTR	1433	F58D5.5	protein_coding	Enhancer	Enhancer	0	0	5	5	53	ITS_175
I	12100423	12100483	-	5	81.7	60	intron	intron	0	rrf-2	protein_coding	Heterochromatin	Heterochromatin	0	0	0	0	0	ITS_176
I	12119882	12120044	-	18	92	162	intron	intron	0	M01G12.6	protein_coding	Polycomb	Heterochromatin	0	0	0	0	0	ITS_177
I	12175890	12176034	-	11	87.5	144	intron	intron	0	R05D7.3	protein_coding	Low signal	Enhancer	0	0	0	0	0	ITS_178
I	12195120	12195329	+	12	84	209	intergenic	ncrna	0	R05D7.9	ncRNA	Enhancer	Enhancer	0	0	1	0	12	ITS_179
I	12202790	12203012	+	13	82	222	intron	ncrna	0	C15C6.6	ncRNA	Low signal	Polycomb	0	1	2	0	3	ITS_180
I	12223509	12223605	-	7	89.6	96	ncrna	ncrna	0	F14B6.8	ncRNA	Low signal	Polycomb	0	0	0	0	0	ITS_181
I	12277713	12277839	-	8	86.5	126	intron	intron	0	F41D3.11	protein_coding	Heterochromatin	Heterochromatin	0	0	0	0	1	ITS_182
I	12282271	12282361	-	5	83.3	90	intron	intron	0	F56H6.1	protein_coding	Heterochromatin	Heterochromatin	0	0	0	0	0	ITS_183
I	12342169	12342289	+	7	85	120	intron	intron	0	nhr-217	protein_coding	Heterochromatin	Heterochromatin	0	0	0	1	3	ITS_184
I	12421032	12421067	+	5	94.4	35	intergenic	exon	171	oac-13	protein_coding	Heterochromatin	Heterochromatin	0	0	0	0	1	ITS_185
I	12436515	12436615	+	8	85.3	100	intron	intron	0	glct-2	protein_coding	Heterochromatin	Heterochromatin	0	0	0	0	1	ITS_186
I	12605632	12605674	+	5	90.5	42	intron	intron	0	T07D10.1	protein_coding	Enhancer	Polycomb	0	0	1	0	1	ITS_187
I	12620456	12620504	-	4	90	48	intergenic	ncrna	564	T07D10.12	ncRNA	Heterochromatin	Heterochromatin	0	0	0	0	0	ITS_188
I	12624620	12624698	-	6	89.7	78	intron	intron	0	flp-33	protein_coding	Polycomb	Heterochromatin	0	0	0	0	0	ITS_189
I	12624849	12624969	-	11	88.3	120	intron	intron	0	flp-33	protein_coding	Heterochromatin	Heterochromatin	0	0	0	0	0	ITS_190
I	12723263	12723317	+	5	83.3	54	intergenic	5' UTR	380	T06G6.12	protein_coding	Polycomb	Polycomb	0	0	0	0	0	ITS_191
I	12830480	12830692	-	13	76.3	212	intron	ncrna	0	Y18D10A.28	ncRNA	Low signal	Gene body	0	1	2	0	3	ITS_192
I	12846262	12846424	-	9	87	162	intron	intron	0	Y18D10A.8	protein_coding	Low signal	Low signal	0	0	0	2	4	ITS_193
I	12860841	12860986	-	8	79.2	145	intron	intron	0	clec-104	protein_coding	Gene body	Heterochromatin	0	1	1	1	3	ITS_194
I	13033228	13033337	+	5	80.9	109	intergenic	5' UTR	182	W05B5.1	protein_coding	Enhancer	Enhancer	0	0	0	0	1	ITS_195
I	13033819	13033896	+	6	84.4	77	intron	intron	0	W05B5.1	protein_coding	Gene body	Enhancer	0	0	0	1	1	ITS_196
I	13318419	13318473	+	4	89.1	54	intron	intron	0	pde-1	protein_coding	Polycomb	Enhancer	0	0	0	1	1	ITS_197
I	13318819	13318919	-	7	86.3	100	intergenic	exon	115	pde-1	protein_coding	Low signal	Enhancer	1	0	0	0	1	ITS_198
I	13450381	13450494	+	6	82.5	113	intergenic	3' UTR	163	spr-5	protein_coding	Gene body	Gene body	0	0	0	3	6	ITS_199
I	13528511	13528553	+	4	92.9	42	intergenic	exon	152	Y87G2A.20	protein_coding	Enhancer	Enhancer	0	1	2	2	7	ITS_200
I	13530499	13530655	+	11	83.5	156	intron	intron	0	Y87G2A.20	protein_coding	Heterochromatin	Heterochromatin	0	0	1	0	3	ITS_201
I	13532057	13532244	-	8	79.9	187	intergenic	exon	613	Y87G2A.20	protein_coding	Low signal	Heterochromatin	0	0	1	0	4	ITS_202
I	13903201	13903332	-	10	87.9	131	intron	intron	0	trp-4	protein_coding	Heterochromatin	Heterochromatin	0	0	2	0	4	ITS_203
I	13903755	13903947	-	14	89.1	192	intron	intron	0	trp-4	protein_coding	Heterochromatin	Heterochromatin	0	0	0	0	0	ITS_204
I	13904280	13904470	+	13	86.5	190	intron	intron	0	trp-4	protein_coding	Heterochromatin	Heterochromatin	0	0	0	3	4	ITS_205
I	13912849	13913099	+	10	71.6	250	intron	intron	0	trp-4	protein_coding	Heterochromatin	Heterochromatin	0	0	4	1	9	ITS_206
I	13927846	13927912	-	8	95.5	66	intergenic	3' UTR	46	Y71A12B.23	protein_coding	Heterochromatin	Heterochromatin	0	0	1	0	1	ITS_207
I	13940479	13940645	+	7	81.1	166	intron	intron	0	Y71A12B.8	protein_coding	Heterochromatin	Polycomb	0	0	0	1	2	ITS_208
I	13943645	13943848	+	4	40.6	203	intron	intron	0	usp-3	protein_coding	Gene body	Gene body	0	0	0	0	5	ITS_209
I	14029375	14029488	+	8	82.6	113	intergenic	ncrna	11	ZC334.17	ncRNA	Enhancer	Enhancer	0	0	2	0	2	ITS_210
I	14075031	14075157	-	11	87.3	126	ncrna	ncrna	0	F47G4.12	ncRNA	Polycomb	Enhancer	0	0	0	1	3	ITS_211
I	14092098	14092344	-	12	66.4	246	intron	intron	0	Y63D3A.12	ncRNA	Polycomb	Heterochromatin	0	0	1	3	11	ITS_212
I	14095553	14096228	-	38	71.4	675	intron	intron	0	fbxb-100	protein_coding	Promoter	Gene body	0	1	1	4	37	ITS_213
I	14135148	14135355	+	10	69.2	207	intron	intron	0	kal-1	protein_coding	Enhancer	Enhancer	0	0	1	0	3	ITS_214
I	14160620	14160947	+	20	76.1	327	intron	intron	0	best-8	protein_coding	Heterochromatin	Heterochromatin	0	0	1	1	4	ITS_215
I	14184240	14184468	+	11	81.2	228	intron	intron	0	ZK849.1	protein_coding	Gene body	Polycomb	0	0	1	0	2	ITS_216
I	14192185	14192263	-	7	89.7	78	intron	intron	0	gopc-1	protein_coding	Polycomb	Heterochromatin	0	0	0	0	0	ITS_217
I	14196095	14196227	-	11	88.6	132	intron	intron	0	gopc-1	protein_coding	Low signal	Polycomb	0	0	0	1	4	ITS_218
I	14226522	14226958	+	21	75.7	436	intron	intron	0	eya-1	protein_coding	Enhancer	Polycomb	0	0	0	0	2	ITS_219
I	14262411	14262861	+	21	80.7	450	intergenic	5' UTR	439	pes-7	protein_coding	Polycomb	Enhancer	0	0	0	0	0	ITS_220
I	14278773	14278911	+	10	79.3	138	intergenic	ncrna	0	F09C3.9	ncRNA	Low signal	Enhancer	0	0	0	0	0	ITS_221
I	14282085	14282595	+	31	81.3	510	intergenic	ncrna	0	F09C3.8	ncRNA	Polycomb	Polycomb	0	0	0	1	4	ITS_222
I	14289576	14289750	-	6	81.6	174	intron	intron	0	fbxa-103	protein_coding	Polycomb	Heterochromatin	0	0	0	0	0	ITS_223
I	14310104	14310260	-	14	86.5	156	intergenic	exon	748	F49B2.3	protein_coding	Enhancer	Polycomb	0	0	0	0	4	ITS_224
I	14330305	14330599	-	18	82.7	294	intergenic	exon	485	F49B2.6	protein_coding	Polycomb	Heterochromatin	0	0	1	0	3	ITS_225
I	14371669	14372286	-	42	84.3	617	intron	ncrna	0	Y105E8A.49	ncRNA	Polycomb	Polycomb	0	0	1	1	2	ITS_226
I	14373147	14373405	+	11	81.8	258	intron	intron	0	bbs-1	protein_coding	Polycomb	Polycomb	0	0	1	0	1	ITS_227
I	14383301	14383385	-	9	89.3	84	intron	ncrna	0	Y105E8A.39	ncRNA	Polycomb	Polycomb	0	0	0	0	0	ITS_228
I	14398890	14398980	+	7	85.6	90	intron	intron	0	lev-10	protein_coding	Heterochromatin	Gene body	0	3	0	0	5	ITS_229
I	14437340	14438332	-	78	80.6	992	intron	ncrna	0	Y105E8A.44	ncRNA	Gene body	Polycomb	0	4	2	17	146	ITS_230
I	14440691	14441148	+	26	73.8	457	intron	ncrna	0	Y105E8A.43	ncRNA	Low signal	Polycomb	0	2	8	2	17	ITS_231
I	14444522	14444696	-	13	85.6	174	intron	intron	0	catp-1	protein_coding	Polycomb	Polycomb	0	3	1	1	7	ITS_232
I	14461495	14461557	+	4	76.1	62	intron	intron	0	Y105E8A.13	protein_coding	Heterochromatin	Gene body	0	1	2	0	16	ITS_233
I	14524278	14524380	+	9	86.3	102	intergenic	5' UTR	5150	zoo-1	protein_coding	Enhancer	Enhancer	0	0	0	2	14	ITS_234
I	14526068	14526322	+	9	69.7	254	intergenic	5' UTR	3208	zoo-1	protein_coding	Enhancer	Enhancer	0	0	0	0	2	ITS_235
I	14541842	14541997	+	8	81.6	155	intron	intron	0	zoo-1	protein_coding	Gene body	Gene body	0	0	0	1	2	ITS_236
I	14615991	14616227	+	6	65.1	236	intron	intron	0	Y105E8A.25	protein_coding	Enhancer	Enhancer	0	0	0	0	21	ITS_237
I	14733054	14733310	-	7	78.7	256	intron	intron	0	K05C4.8	protein_coding	Gene body	Polycomb	0	0	7	28	331	ITS_238
I	15055167	15055221	-	4	83.3	54	intron	intron	0	F31C3.6	protein_coding	Heterochromatin	Heterochromatin	0	0	0	1	3	ITS_239
II	292061	292390	-	17	81.2	329	intergenic	3' UTR	200	djr-1.1	protein_coding	Gene body	Polycomb	0	0	0	1	7	ITS_240
II	333445	333632	+	10	75.6	187	intergenic	ncrna	245	K01A2.15	ncRNA	Low signal	Low signal	0	0	0	0	0	ITS_241
II	337533	337617	+	4	85.7	84	5' UTR	5' UTR	0	cpn-2	protein_coding	Enhancer	Low signal	0	0	0	0	0	ITS_242
II	354154	354430	+	10	83.3	276	intron	intron	0	dmsr-4	protein_coding	Low signal	Low signal	0	0	0	0	2	ITS_243
II	355264	355324	+	6	91.7	60	intron	intron	0	dmsr-4	protein_coding	Low signal	Low signal	0	0	0	1	1	ITS_244
II	367102	367182	-	4	70.9	80	intron	intron	0	ptr-3	protein_coding	Enhancer	Polycomb	0	0	0	0	8	ITS_245
II	368379	368611	-	12	80.3	232	intergenic	ncrna	0	C03H5.8	ncRNA	Low signal	Polycomb	0	0	1	2	12	ITS_246
II	373459	373790	+	18	76.3	331	intergenic	exon	1459	C03H5.4	protein_coding	Low signal	Low signal	0	0	1	2	17	ITS_247
II	387212	387591	-	13	79.7	379	intron	intron	0	C03H5.3	protein_coding	Gene body	Gene body	0	1	2	1	3	ITS_248
II	573615	573924	+	26	88.5	309	ncrna	ncrna	0	W08F4.18	ncRNA	Enhancer	Gene body	0	1	1	1	14	ITS_249
II	618604	618652	-	6	95.8	48	intron	intron	0	T04B8.5	protein_coding	Gene body	Gene body	0	3	0	0	3	ITS_250
II	643823	644105	-	18	85.5	282	intron	intron	0	K07E8.7	protein_coding	Polycomb	Polycomb	0	0	1	3	12	ITS_251
II	648550	648708	+	5	37.3	158	intron	intron	0	K07E8.7	protein_coding	Polycomb	Polycomb	0	0	0	0	21	ITS_252
II	648987	649387	+	9	36	400	intron	intron	0	K07E8.7	protein_coding	Gene body	Polycomb	0	0	0	0	46	ITS_253
II	651059	651627	+	27	83.4	568	intron	ncrna	0	K07E8.14	ncRNA	Polycomb	Polycomb	0	0	0	0	2	ITS_254
II	681269	681371	+	7	85	102	intron	intron	0	T02H6.8	protein_coding	Low signal	Polycomb	0	0	0	0	0	ITS_255
II	692333	692392	+	6	91.7	59	intron	intron	0	T02H6.3	protein_coding	Low signal	Heterochromatin	0	0	1	2	9	ITS_256
II	692562	692714	+	10	81.6	152	intron	intron	0	T02H6.3	protein_coding	Low signal	Heterochromatin	0	0	1	0	32	ITS_257
II	874620	874720	-	5	66.3	100	intron	intron	0	alg-2	protein_coding	Gene body	Gene body	0	0	0	1	5	ITS_258
II	1090436	1090478	-	4	88.1	42	intergenic	5' UTR	1527	snf-3	protein_coding	Gene body	Enhancer	0	0	0	1	1	ITS_259
II	1097198	1097307	+	7	81.8	109	intron	intron	0	snf-3	protein_coding	Gene body	Gene body	0	0	0	0	0	ITS_260
II	1104693	1104879	-	7	81.7	186	intergenic	3' UTR	65	col-40	protein_coding	Gene body	Polycomb	0	0	0	0	0	ITS_261
II	1155285	1155339	-	4	88.9	54	intergenic	3' UTR	2580	pod-2	protein_coding	Enhancer	Polycomb	0	0	0	1	1	ITS_262
II	1180476	1180691	+	16	83.2	215	intergenic	5' UTR	1153	nas-27	protein_coding	Gene body	Polycomb	0	0	0	0	0	ITS_263
II	1223562	1223797	-	14	82.6	235	intron	intron	0	F53A10.2	protein_coding	Polycomb	Gene body	0	0	0	0	1	ITS_264
II	1224949	1225041	+	8	87.5	92	intron	intron	0	F53A10.2	protein_coding	Polycomb	Gene body	0	0	0	0	0	ITS_265
II	1240284	1240554	-	13	77.5	270	intron	intron	0	lin-42	protein_coding	Gene body	Gene body	0	0	0	0	2	ITS_266
II	1241783	1241819	-	4	94.4	36	intron	intron	0	lin-42	protein_coding	Gene body	Gene body	0	0	0	0	0	ITS_267
II	1242093	1242165	-	6	88.9	72	intron	intron	0	F47F6.11	ncRNA	Gene body	Gene body	0	0	0	0	0	ITS_268
II	1252429	1252634	-	10	73.1	205	intergenic	ncrna	0	F47F6.12	ncRNA	Gene body	Polycomb	0	0	0	0	2	ITS_269
II	1266211	1266775	-	30	82.4	564	intron	intron	0	oac-30	protein_coding	Polycomb	Polycomb	0	0	0	0	0	ITS_270
II	1289909	1289951	+	4	90.5	42	intron	intron	0	srz-64	protein_coding	Polycomb	Heterochromatin	0	0	0	0	2	ITS_271
II	1387009	1387033	+	4	100	24	intron	intron	0	aat-7	protein_coding	Low signal	Low signal	0	0	0	0	0	ITS_272
II	1421523	1422017	-	19	83.8	494	intron	ncrna	0	Y51H7C.40	ncRNA	Gene body	Polycomb	0	0	1	1	6	ITS_273
II	1514439	1514559	+	8	83.3	120	intron	intron	0	math-45	protein_coding	Enhancer	Polycomb	0	0	0	0	2	ITS_274
II	1564896	1565286	+	5	41.6	390	intergenic	3' UTR	2021	K05F6.14	protein_coding	Heterochromatin	Heterochromatin	0	0	0	0	18	ITS_275
II	1668542	1668666	+	5	64.1	124	intron	intron	0	srw-97	protein_coding	Polycomb	Polycomb	0	0	0	1	5	ITS_276
II	1733373	1733491	+	4	73.2	118	intergenic	3' UTR	82	ceh-82	protein_coding	Heterochromatin	Heterochromatin	0	0	0	1	10	ITS_277
II	1735983	1736064	-	6	68.8	81	intron	intron	0	ceh-83	protein_coding	Promoter	Heterochromatin	0	0	0	0	0	ITS_278
II	1846743	1846815	-	5	81.9	72	intergenic	3' UTR	168	fbxb-97	protein_coding	Heterochromatin	Heterochromatin	0	0	1	4	17	ITS_279
II	2070307	2070498	+	10	78.6	191	ncrna	ncrna	0	F07E5.11	ncRNA	Heterochromatin	Heterochromatin	0	0	2	6	29	ITS_280
II	2088153	2088315	-	7	80.4	162	intron	intron	0	trpl-5	protein_coding	Polycomb	Heterochromatin	0	0	0	0	0	ITS_281
II	2331957	2332023	-	5	86.4	66	intergenic	3' UTR	165	ZK1240.1	protein_coding	Low signal	Polycomb	0	0	0	0	0	ITS_282
II	2336366	2336473	+	7	84.3	107	intron	intron	0	F43C11.7	protein_coding	Polycomb	Polycomb	0	0	0	0	0	ITS_283
II	2337197	2337251	-	6	87	54	intron	intron	0	F43C11.7	protein_coding	Polycomb	Polycomb	0	0	0	0	1	ITS_284
II	2353643	2353842	-	10	75.6	199	intron	ncrna	0	F43C11.13	ncRNA	Heterochromatin	Polycomb	0	1	0	0	1	ITS_285
II	2372796	2372844	+	4	74	48	intron	intron	0	F16G10.3	protein_coding	Low signal	Heterochromatin	0	0	0	0	0	ITS_286
II	2389860	2390110	+	10	66.8	250	intron	intron	0	F16G10.10	protein_coding	Heterochromatin	Heterochromatin	0	0	0	0	0	ITS_287
II	2525594	2526080	-	24	77.6	486	intron	intron	0	K02F6.7	protein_coding	Polycomb	Heterochromatin	0	0	0	0	3	ITS_288
II	2526936	2527381	+	23	77.8	445	intron	intron	0	K02F6.10	ncRNA	Polycomb	Heterochromatin	0	3	4	4	18	ITS_289
II	2550208	2550292	+	8	92.9	84	intron	intron	0	K02F6.3	protein_coding	Heterochromatin	Heterochromatin	0	0	1	2	6	ITS_290
II	2573999	2574085	-	4	52.3	86	intron	intron	0	usp-39	protein_coding	Gene body	Gene body	0	0	0	0	0	ITS_291
II	2574778	2574919	-	4	49.3	141	intron	intron	0	usp-39	protein_coding	Gene body	Gene body	0	0	0	0	1	ITS_292
II	2587690	2587874	-	16	79	184	intron	intron	0	sri-39	protein_coding	Gene body	Polycomb	0	0	0	0	0	ITS_293
II	2611041	2611251	-	9	83.3	210	intron	intron	0	sri-38	protein_coding	Polycomb	Polycomb	0	0	0	1	1	ITS_294
II	2618639	2618699	+	4	83.3	60	intergenic	5' UTR	742	D2062.6	protein_coding	Low signal	Heterochromatin	0	0	0	0	0	ITS_295
II	2632151	2632599	-	35	91.4	448	intron	intron	0	D2062.1	protein_coding	Polycomb	Heterochromatin	0	0	0	0	0	ITS_296
II	2633512	2633585	-	6	91.8	73	intergenic	3' UTR	458	D2062.1	protein_coding	Polycomb	Polycomb	0	0	0	0	0	ITS_297
II	2634813	2634861	+	6	95.8	48	pseudogene_intron	pseudogene_intron	0	sri-41	pseudogene	Polycomb	Polycomb	0	0	0	0	0	ITS_298
II	2639534	2639720	+	12	82.8	186	intergenic	3' UTR	181	F22E5.9	protein_coding	Low signal	Polycomb	0	0	0	0	0	ITS_299
II	2668381	2668545	+	8	79.1	164	intergenic	peseudogene_exon	43	sri-59	pseudogene	Low signal	Polycomb	0	0	1	0	1	ITS_300
II	2679235	2679343	+	5	85.2	108	3' UTR	3' UTR	0	F34D6.1	protein_coding	Polycomb	Polycomb	0	1	10	5	40	ITS_301
II	2683186	2683240	+	4	87	54	intergenic	3' UTR	88	ceh-87	protein_coding	Polycomb	Polycomb	0	1	0	0	4	ITS_302
II	2684941	2685025	-	9	91.7	84	intron	intron	0	sup-9	protein_coding	Polycomb	Polycomb	0	0	0	0	0	ITS_303
II	2716898	2717030	-	17	90.5	132	intron	intron	0	T05A8.3	protein_coding	Gene body	Polycomb	0	0	0	1	2	ITS_304
II	2717140	2717186	-	4	81.2	46	intron	intron	0	T05A8.3	protein_coding	Gene body	Polycomb	0	0	0	0	0	ITS_305
II	2731023	2731089	-	7	90.9	66	intergenic	exon	229	T05A8.5	protein_coding	Low signal	Polycomb	0	0	0	0	0	ITS_306
II	2734373	2734565	-	13	85.4	192	intron	intron	0	T05A8.5	protein_coding	Polycomb	Enhancer	0	0	0	0	1	ITS_307
II	2739313	2739403	-	4	81.1	90	intron	intron	0	T05A8.6	protein_coding	Polycomb	Polycomb	0	0	0	0	0	ITS_308
II	2763658	2763790	-	9	86.4	132	intron	ncrna	0	F29A7.9	ncRNA	Polycomb	Heterochromatin	0	0	5	1	18	ITS_309
II	2817169	2817265	-	8	89.6	96	intron	intron	0	set-13	protein_coding	Gene body	Heterochromatin	0	0	3	0	3	ITS_310
II	2830670	2830887	+	7	75.3	217	intron	intron	0	K12H6.6	protein_coding	Gene body	Gene body	0	0	1	0	2	ITS_311
II	2836362	2836444	-	4	69.4	82	intron	intron	0	K12H6.7	protein_coding	Promoter	Polycomb	0	0	0	0	1	ITS_312
II	2845267	2845309	-	5	88.1	42	intergenic	3' UTR	68	ptc-3	protein_coding	Heterochromatin	Polycomb	0	0	2	1	7	ITS_313
II	2846566	2846973	-	18	76.4	407	intron	intron	0	ptc-3	protein_coding	Polycomb	Polycomb	0	0	1	13	82	ITS_314
II	2847764	2848131	-	18	79.6	367	intron	ncrna	0	Y110A2AL.16	ncRNA	Polycomb	Polycomb	0	3	14	15	138	ITS_315
II	2859211	2859720	-	28	79.5	509	intergenic	ncrna	0	Y110A2AL.18	ncRNA	Polycomb	Polycomb	1	3	10	13	85	ITS_316
II	2862660	2862949	+	20	82	289	intergenic	ncrna	1029	Y110A2AL.t2	tRNA	Gene body	Polycomb	0	0	0	1	3	ITS_317
II	2870894	2871092	+	13	69.8	198	intergenic	exon	136	Y110A2AL.2	protein_coding	Low signal	Heterochromatin	0	3	12	0	27	ITS_318
II	2896149	2896740	-	12	49.3	591	intergenic	exon	0	ubc-26	protein_coding	Gene body	Gene body	0	0	0	0	33	ITS_319
II	2899518	2899659	+	4	46.2	141	intron	intron	0	ubc-26	protein_coding	Gene body	Gene body	0	0	0	0	1	ITS_320
II	2933042	2933126	+	5	85.7	84	intron	intron	0	irld-63	protein_coding	Polycomb	Heterochromatin	0	0	0	0	0	ITS_321
II	2939660	2939929	+	14	83.7	269	intron	intron	0	irld-66	protein_coding	Low signal	Heterochromatin	0	0	0	0	0	ITS_322
II	2944834	2944911	+	5	82.3	77	intron	intron	0	irld-49	protein_coding	Polycomb	Heterochromatin	0	0	0	0	0	ITS_323
II	2946925	2947004	+	7	84.8	79	5' UTR	5' UTR	0	srw-79	protein_coding	Polycomb	Heterochromatin	0	0	1	0	1	ITS_324
II	2953223	2953276	-	4	85.5	53	intron	intron	0	hpa-2	protein_coding	Polycomb	Polycomb	0	0	0	0	0	ITS_325
II	2978009	2978213	+	13	83.8	204	intron	ncrna	0	K08A2.11	ncRNA	Polycomb	Gene body	0	0	0	0	1	ITS_326
II	2979029	2979435	-	29	82.7	406	intron	ncrna	0	K08A2.16	ncRNA	Polycomb	Gene body	0	0	0	0	0	ITS_327
II	2990103	2990555	+	27	85.4	452	intron	intron	0	K08A2.4	protein_coding	Gene body	Gene body	0	1	1	6	15	ITS_328
II	3007533	3007805	+	13	73.3	272	intergenic	3' UTR	26	C41H7.3	protein_coding	Polycomb	Polycomb	0	0	0	2	19	ITS_329
II	3011664	3011936	-	13	73.3	272	intergenic	exon	144	C41H7.9	protein_coding	Enhancer	Polycomb	0	0	1	0	2	ITS_330
II	3014032	3014265	-	16	86.3	233	ncrna	ncrna	0	C41H7.11	ncRNA	Low signal	Polycomb	0	0	0	0	1	ITS_331
II	3015336	3015474	-	8	83.3	138	intron	intron	0	C41H7.2	protein_coding	Low signal	Polycomb	0	0	0	0	0	ITS_332
II	3035344	3035606	-	12	80.5	262	intron	ncrna	0	B0454.18	ncRNA	Polycomb	Polycomb	0	0	0	0	1	ITS_333
II	3042937	3043259	-	16	75.7	322	intron	intron	0	B0454.8	protein_coding	Heterochromatin	Heterochromatin	0	0	1	0	2	ITS_334
II	3049056	3049457	-	25	86.1	401	intron	ncrna	0	B0454.15	ncRNA	Heterochromatin	Heterochromatin	0	0	0	0	0	ITS_335
II	3061516	3061564	-	4	87.5	48	intron	intron	0	Y25C1A.6	protein_coding	Promoter	Polycomb	0	0	0	1	2	ITS_336
II	3117536	3117608	-	5	86.1	72	intergenic	ncrna	0	T10D4.18	ncRNA	Polycomb	Polycomb	0	0	0	0	1	ITS_337
II	3118548	3118584	-	6	100	36	intergenic	3' UTR	97	T10D4.7	protein_coding	Polycomb	Enhancer	0	0	0	0	1	ITS_338
II	3119599	3119678	+	8	86.4	79	intron	intron	0	T10D4.6	protein_coding	Promoter	Gene body	0	0	0	0	1	ITS_339
II	3126660	3126864	-	9	67.9	204	intergenic	exon	176	ins-31	protein_coding	Polycomb	Heterochromatin	0	0	1	3	24	ITS_340
II	3128090	3128162	+	6	90.3	72	intergenic	3' UTR	279	ins-31	protein_coding	Polycomb	Heterochromatin	0	0	1	1	2	ITS_341
II	3135440	3135576	-	8	84.1	136	intergenic	exon	4	sri-54	protein_coding	Low signal	Heterochromatin	0	0	0	1	17	ITS_342
II	3136239	3136513	+	15	76.6	274	intron	intron	0	sri-54	protein_coding	Low signal	Heterochromatin	0	0	0	0	0	ITS_343
II	3159402	3159480	-	4	83.3	78	intergenic	exon	317	sri-34	protein_coding	Polycomb	Heterochromatin	0	0	0	0	0	ITS_344
II	3189035	3189140	-	5	81.5	105	intergenic	exon	197	Y27F2A.11	protein_coding	Low signal	Polycomb	0	0	0	0	0	ITS_345
II	3234262	3234504	+	4	43	242	intron	intron	0	C17F4.8	protein_coding	Enhancer	Low signal	0	0	0	0	21	ITS_346
II	3256020	3256080	-	4	85	60	intron	intron	0	gcy-19	protein_coding	Low signal	Polycomb	0	0	0	0	1	ITS_347
II	3261809	3262018	-	11	84.8	209	intergenic	exon	810	F02E11.2	protein_coding	Low signal	Polycomb	0	0	0	0	1	ITS_348
II	3280351	3280519	+	11	82.7	168	intron	ncrna	0	F02E11.8	ncRNA	Gene body	Heterochromatin	0	0	1	0	1	ITS_349
II	3288173	3288251	-	7	91	78	intron	intron	0	sri-63	protein_coding	Polycomb	Heterochromatin	0	0	0	0	0	ITS_350
II	3328940	3329018	+	5	87.3	78	intergenic	ncrna	559	F14D2.16	ncRNA	Enhancer	Heterochromatin	0	0	5	8	15	ITS_351
II	3367603	3367688	+	5	83.5	85	intron	intron	0	Y49F6C.7	protein_coding	Gene body	Heterochromatin	0	0	0	1	3	ITS_352
II	3387030	3387090	-	5	88.3	60	intergenic	3' UTR	52	T06D4.6	protein_coding	Enhancer	Polycomb	0	1	0	1	2	ITS_353
II	3400893	3401007	-	5	84.2	114	intron	intron	0	nep-10	protein_coding	Polycomb	Heterochromatin	0	0	0	0	1	ITS_354
II	3417648	3417821	+	6	62.7	173	intron	intron	0	nep-6	protein_coding	Polycomb	Heterochromatin	0	0	0	0	0	ITS_355
II	3422174	3422276	+	11	93.1	102	intron	intron	0	F18A12.9	ncRNA	Polycomb	Gene body	0	0	0	0	0	ITS_356
II	3434728	3434800	+	5	81.9	72	intron	intron	0	C16C8.23	ncRNA	Polycomb	Polycomb	0	0	1	0	3	ITS_357
II	3442844	3442910	+	4	84.8	66	intron	intron	0	C16C8.22	protein_coding	Polycomb	Polycomb	0	0	1	1	2	ITS_358
II	3459363	3459483	+	11	89.3	120	intergenic	exon	135	C16C8.7	protein_coding	Heterochromatin	Heterochromatin	0	0	0	0	0	ITS_359
II	3476615	3476853	+	12	80.4	238	intron	intron	0	fbxb-104	protein_coding	Promoter	Polycomb	0	0	1	0	2	ITS_360
II	3502014	3502167	-	4	54.2	153	intron	intron	0	Y49F6B.15	ncRNA	Gene body	Gene body	0	0	0	0	5	ITS_361
II	3613526	3613624	-	6	83.3	98	intron	intron	0	F40E12.2	protein_coding	Polycomb	Polycomb	0	0	0	0	0	ITS_362
II	3676172	3676284	+	7	84.2	112	intron	intron	0	F19B10.2	protein_coding	Gene body	Polycomb	0	0	1	0	1	ITS_363
II	3718762	3718962	+	9	75.1	200	intron	intron	0	fbxc-52	protein_coding	Gene body	Gene body	0	0	1	2	3	ITS_364
II	3838320	3838362	+	4	85.7	42	pseudogene_intron	pseudogene_intron	0	C17A2.6	pseudogene	Low signal	Low signal	0	0	0	0	0	ITS_365
II	3912514	3912621	-	8	88	107	intron	intron	0	F53C3.1	protein_coding	Gene body	Polycomb	1	0	0	0	1	ITS_366
II	3929929	3930017	-	4	69.7	88	intergenic	5' UTR	1947	F53C3.13	protein_coding	Gene body	Enhancer	0	0	0	0	1	ITS_367
II	3930127	3930258	-	12	77	131	intergenic	3' UTR	1919	Y14H12B.2	protein_coding	Gene body	Enhancer	0	0	0	0	1	ITS_368
II	3957943	3958064	+	10	88.4	121	intron	intron	0	sea-2	protein_coding	Enhancer	Enhancer	0	0	4	9	24	ITS_369
II	3973409	3973493	+	4	79.8	84	intron	intron	0	K10G6.4	protein_coding	Gene body	Enhancer	0	0	0	0	1	ITS_370
II	3975264	3975420	+	11	81.5	156	intergenic	ncrna	0	K10G6.7	ncRNA	Enhancer	Polycomb	0	0	0	0	0	ITS_371
II	3984311	3984557	+	17	85	246	intron	ncrna	0	K10G6.6	ncRNA	Enhancer	Polycomb	0	0	0	1	1	ITS_372
II	4011457	4011569	-	9	85.2	112	intron	ncrna	0	Y14H12A.3	ncRNA	Low signal	Enhancer	0	0	0	0	0	ITS_373
II	4012259	4012379	-	4	69.2	120	intron	intron	0	ephx-1	protein_coding	Polycomb	Gene body	0	0	0	0	1	ITS_374
II	4013235	4013502	+	7	70.6	267	intron	intron	0	ephx-1	protein_coding	Polycomb	Gene body	0	0	0	0	0	ITS_375
II	4024406	4024611	-	6	61.9	205	intron	intron	0	K07D4.5	protein_coding	Low signal	Polycomb	0	0	0	0	3	ITS_376
II	4040992	4041135	+	8	85.4	143	intron	intron	0	pqn-48	protein_coding	Gene body	Polycomb	0	0	0	1	3	ITS_377
II	4069715	4069773	+	4	82.3	58	exon	exon	0	W06A11.1	protein_coding	Polycomb	Polycomb	0	0	0	0	0	ITS_378
II	4081927	4082173	+	16	87	246	ncrna	ncrna	0	R11F4.6	ncRNA	Gene body	Polycomb	0	0	1	0	2	ITS_379
II	4105515	4105551	+	4	94.4	36	intergenic	ncrna	1035	T08H4.7	ncRNA	Enhancer	Enhancer	0	0	0	0	0	ITS_380
II	4106575	4106785	+	12	73.3	210	intergenic	ncrna	0	T08H4.8	ncRNA	Low signal	Enhancer	0	0	1	0	2	ITS_381
II	4117168	4117228	-	7	90	60	intron	intron	0	rhgf-2	protein_coding	Low signal	Low signal	0	0	0	0	1	ITS_382
II	4118355	4118391	+	4	91.7	36	intron	intron	0	rhgf-2	protein_coding	Low signal	Enhancer	0	0	0	0	0	ITS_383
II	4152246	4152324	+	6	85.9	78	intergenic	3' UTR	2567	F56D3.1	protein_coding	Enhancer	Enhancer	0	0	0	0	0	ITS_384
II	4153333	4153459	-	9	87.3	126	intergenic	5' UTR	2312	R03H10.2	protein_coding	Enhancer	Enhancer	0	0	0	1	2	ITS_385
II	4155202	4155477	+	23	88.8	275	intergenic	5' UTR	294	R03H10.2	protein_coding	Gene body	Gene body	0	0	0	0	0	ITS_386
II	4158258	4158445	-	9	72.8	187	intron	intron	0	R03H10.2	protein_coding	Low signal	Gene body	0	0	0	0	1	ITS_387
II	4170122	4170170	+	4	87.5	48	intron	intron	0	R03H10.10	ncRNA	Low signal	Polycomb	0	0	0	1	2	ITS_388
II	4194654	4194820	-	6	76.2	166	intron	intron	0	cpna-1	protein_coding	Polycomb	Polycomb	0	0	0	0	2	ITS_389
II	4196252	4196360	-	6	83.3	108	intron	intron	0	mth-1	protein_coding	Polycomb	Polycomb	0	0	0	0	1	ITS_390
II	4248927	4249023	-	7	88.5	96	intron	intron	0	gpa-11	protein_coding	Gene body	Low signal	0	0	0	0	0	ITS_391
II	4272525	4272633	-	9	88.9	108	intergenic	exon	3580	C01F1.4	protein_coding	Low signal	Polycomb	0	0	0	0	0	ITS_392
II	4277708	4278038	-	23	86.7	330	intron	intron	0	C01F1.4	protein_coding	Low signal	Polycomb	0	0	1	0	1	ITS_393
II	4312347	4312461	-	8	87.7	114	ncrna	ncrna	0	Y52E8A.7	ncRNA	Low signal	Polycomb	0	1	1	1	3	ITS_394
II	4354918	4355080	-	13	87	162	intron	ncrna	0	H20J04.10	ncRNA	Low signal	Polycomb	0	0	1	0	1	ITS_395
II	4365206	4365294	-	6	84.4	88	intron	intron	0	lat-2	protein_coding	Low signal	Low signal	0	0	0	0	0	ITS_396
II	4368816	4368900	+	5	81	84	intron	ncrna	0	B0286.9	ncRNA	Polycomb	Polycomb	0	0	0	0	1	ITS_397
II	4370548	4370650	+	7	85.3	102	intron	intron	0	B0286.3	protein_coding	Polycomb	Gene body	0	0	0	1	5	ITS_398
II	4398111	4398284	+	10	77.8	173	intron	intron	0	mlt-7	protein_coding	Low signal	Gene body	0	0	0	0	0	ITS_399
II	4398911	4399075	-	9	71.1	164	intron	intron	0	mlt-7	protein_coding	Low signal	Gene body	0	0	0	0	0	ITS_400
II	4453010	4453088	-	4	84.6	78	intron	intron	0	twk-2	protein_coding	Gene body	Gene body	0	0	0	0	0	ITS_401
II	4454972	4455098	+	10	87.3	126	ncrna	ncrna	0	T12C9.8	ncRNA	Gene body	Enhancer	0	0	0	0	0	ITS_402
II	4488052	4488100	-	4	89.6	48	intron	intron	0	T05C1.3	protein_coding	Low signal	Low signal	0	0	0	0	0	ITS_403
II	4714888	4715029	+	8	69.2	141	intron	intron	0	F10G7.10	protein_coding	Enhancer	Enhancer	0	0	0	3	5	ITS_404
II	10201859	10201901	-	4	92.9	42	ncrna	ncrna	0	tts-2	ncRNA	Enhancer	Enhancer	0	1	0	0	2	ITS_405
II	10879851	10880001	+	6	85.3	150	intergenic	exon	926	lurp-1	protein_coding	Low signal	Enhancer	0	0	0	0	1	ITS_406
II	11204646	11204736	-	6	85.6	90	intron	intron	0	srap-1	protein_coding	Low signal	Gene body	0	0	0	0	1	ITS_407
II	11360758	11360818	-	5	88.3	60	intron	intron	0	clh-2	protein_coding	Low signal	Low signal	0	0	0	0	0	ITS_408
II	11365557	11365665	+	7	87	108	intron	intron	0	clh-2	protein_coding	Low signal	Low signal	0	0	0	0	0	ITS_409
II	11501812	11501872	-	4	85	60	intergenic	5' UTR	1348	B0334.20	protein_coding	Low signal	Low signal	0	0	0	0	1	ITS_410
II	11503843	11504080	+	15	84.6	237	intergenic	5' UTR	3379	B0334.20	protein_coding	Low signal	Low signal	0	0	1	0	1	ITS_411
II	11505068	11505439	-	8	53.8	371	intergenic	ncrna	3310	B0334.16	ncRNA	Low signal	Low signal	0	0	0	0	2	ITS_412
II	11506323	11506567	+	4	46.3	244	intergenic	ncrna	2182	B0334.16	ncRNA	Enhancer	Low signal	0	0	0	0	6	ITS_413
II	11732992	11733130	+	9	87.1	138	intergenic	5' UTR	398	F13D12.8	protein_coding	Low signal	Enhancer	0	0	1	0	2	ITS_414
II	11738134	11738306	-	7	80.2	172	intergenic	5' UTR	1149	F13D12.6	protein_coding	Low signal	Enhancer	0	0	0	1	1	ITS_415
II	11838075	11838201	-	5	54.5	126	intergenic	3' UTR	454	T27D12.6	protein_coding	Low signal	Low signal	0	0	0	0	0	ITS_416
II	11905367	11905486	+	9	90	119	intergenic	5' UTR	1090	ZK930.4	protein_coding	Enhancer	Polycomb	0	0	0	3	4	ITS_417
II	11923190	11923551	-	23	80.7	361	intron	intron	0	lin-29	protein_coding	Enhancer	Gene body	0	0	0	0	1	ITS_418
II	11924003	11924225	+	17	86.1	222	intron	intron	0	lin-29	protein_coding	Enhancer	Polycomb	0	0	0	0	0	ITS_419
II	11928328	11928574	+	17	85.8	246	intron	intron	0	Y17G7A.3	ncRNA	Low signal	Gene body	0	0	1	0	2	ITS_420
II	11930280	11930436	-	16	91.7	156	intron	intron	0	lin-29	protein_coding	Low signal	Gene body	0	0	0	0	0	ITS_421
II	11931454	11931580	-	9	86.5	126	intron	intron	0	lin-29	protein_coding	Low signal	Gene body	0	0	1	0	3	ITS_422
II	11932311	11932509	+	13	85.4	198	intron	intron	0	lin-29	protein_coding	Low signal	Gene body	0	0	0	1	1	ITS_423
II	11942624	11942823	-	9	80.2	199	intergenic	ncrna	4755	W03C9.10	ncRNA	Low signal	Low signal	0	0	0	0	0	ITS_424
II	11954937	11955135	+	13	86.4	198	intron	intron	0	W03C9.6	protein_coding	Low signal	Low signal	0	0	0	0	0	ITS_425
II	12011238	12011639	+	16	42.9	401	intron	intron	0	glb-29	protein_coding	Low signal	Low signal	0	0	0	0	0	ITS_426
II	12169553	12170073	+	30	77.6	520	intron	intron	0	Y57A10A.8	protein_coding	Gene body	Gene body	0	0	2	2	5	ITS_427
II	12240011	12240131	+	9	87.5	120	ncrna	ncrna	0	Y57A10A.41	ncRNA	Promoter	Gene body	0	0	0	0	0	ITS_428
II	12241502	12241580	-	4	79.5	78	intron	intron	0	Y57A10A.23	protein_coding	Low signal	Gene body	0	0	0	1	1	ITS_429
II	12242355	12242445	+	5	86.7	90	intergenic	3' UTR	265	Y57A10A.23	protein_coding	Low signal	Low signal	0	0	0	1	1	ITS_430
II	12247645	12247774	-	9	84.5	129	intergenic	3' UTR	34	Y57A10A.24	protein_coding	Enhancer	Low signal	0	0	0	0	0	ITS_431
II	12304438	12304522	-	8	87.1	84	intron	intron	0	sre-50	protein_coding	Low signal	Polycomb	0	0	0	0	0	ITS_432
II	12314801	12314968	+	8	74.2	167	intergenic	exon	1141	sre-51	protein_coding	Low signal	Polycomb	0	0	0	0	0	ITS_433
II	12319574	12319688	-	7	85.1	114	intron	intron	0	sre-49	protein_coding	Low signal	Low signal	0	0	0	1	2	ITS_434
II	12322419	12322545	+	9	87.3	126	intron	ncrna	0	C50E10.16	ncRNA	Low signal	Polycomb	0	0	0	2	2	ITS_435
II	12326399	12326535	-	9	75	136	intron	ncrna	0	C50E10.15	ncRNA	Low signal	Low signal	0	0	0	0	0	ITS_436
II	12326992	12327052	-	6	90	60	intron	intron	0	sre-56	protein_coding	Low signal	Low signal	0	0	0	0	0	ITS_437
II	12343641	12344091	+	22	80.8	450	intron	ncrna	0	C50E10.13	ncRNA	Gene body	Gene body	0	0	0	1	4	ITS_438
II	12381012	12381208	-	19	91.5	196	intergenic	exon	1501	Y57A10B.2	protein_coding	Low signal	Enhancer	0	0	0	0	1	ITS_439
II	12389243	12389438	+	4	42	195	intron	intron	0	sre-41	protein_coding	Low signal	Low signal	0	0	0	0	0	ITS_440
II	12391675	12391923	+	8	76.3	248	intron	intron	0	Y57A10B.6	protein_coding	Gene body	Polycomb	0	0	1	0	2	ITS_441
II	12436732	12437110	+	25	83.1	378	intergenic	exon	886	Y57A10C.9	protein_coding	Low signal	Polycomb	0	0	0	0	0	ITS_442
II	12467218	12467291	+	9	95.9	73	intron	intron	0	sre-37	protein_coding	Low signal	Polycomb	0	0	0	0	0	ITS_443
II	12580747	12580831	-	9	89.3	84	intron	intron	0	clec-4	protein_coding	Gene body	Polycomb	0	0	0	0	1	ITS_444
II	12636746	12636895	-	10	86.8	149	intron	intron	0	nhr-234	protein_coding	Low signal	Polycomb	0	0	1	0	2	ITS_445
II	12659721	12659958	-	11	80.6	237	intron	intron	0	Y38E10A.20	protein_coding	Low signal	Enhancer	0	0	0	0	1	ITS_446
II	12765419	12765710	+	11	73.8	291	intron	intron	0	cnp-2	protein_coding	Gene body	Polycomb	0	1	0	0	8	ITS_447
II	12824413	12824876	+	34	87.7	463	intergenic	exon	366	Y46G5A.36	protein_coding	Low signal	Polycomb	0	0	0	0	2	ITS_448
II	12926627	12926951	-	4	33.6	324	intron	intron	0	F58G1.3	protein_coding	Low signal	Low signal	0	0	0	0	1	ITS_449
II	12942997	12943169	-	11	78.1	172	intron	intron	0	arrd-10	protein_coding	Low signal	Low signal	0	0	0	0	0	ITS_450
II	12999861	13000071	+	8	65.2	210	intron	intron	0	Y38F1A.8	protein_coding	Low signal	Low signal	0	0	0	0	1	ITS_451
II	13071091	13071151	+	6	93.3	60	intron	intron	0	zyx-1	protein_coding	Low signal	Low signal	0	0	1	3	10	ITS_452
II	13260448	13260514	-	4	84.8	66	intergenic	exon	0	Y48C3A.1	protein_coding	Heterochromatin	Heterochromatin	0	0	0	0	3	ITS_453
II	13283628	13283736	-	11	88.9	108	intron	ncrna	0	Y48C3A.23	ncRNA	Gene body	Gene body	0	0	0	0	0	ITS_454
II	13341261	13341616	-	19	82.3	355	intron	intron	0	dmsr-3	protein_coding	Gene body	Polycomb	0	0	2	2	18	ITS_455
II	13353646	13353750	+	8	85.3	104	intergenic	exon	5762	dmsr-3	protein_coding	Low signal	Low signal	0	0	0	0	1	ITS_456
II	13360289	13360666	+	10	38.7	377	intergenic	ncrna	8390	Y48C3A.25	ncRNA	Low signal	Low signal	0	0	0	0	10	ITS_457
II	13360907	13361431	+	13	31.5	524	intergenic	ncrna	7625	Y48C3A.25	ncRNA	Low signal	Low signal	0	0	0	0	3	ITS_458
II	13363619	13363673	+	5	90.7	54	intergenic	ncrna	5383	Y48C3A.25	ncRNA	Low signal	Low signal	0	0	1	0	4	ITS_459
II	13390199	13390475	+	7	46.8	276	intron	intron	0	Y48C3A.14	protein_coding	Gene body	Gene body	0	0	0	0	4	ITS_460
II	13444404	13444554	-	6	82.7	150	intron	intron	0	E01G4.8	ncRNA	Gene body	Gene body	0	0	0	0	0	ITS_461
II	13470019	13470084	+	5	81.8	65	intergenic	exon	417	E01G4.3	protein_coding	Polycomb	Low signal	0	0	0	0	1	ITS_462
II	13511436	13511634	+	15	85.4	198	intron	ncrna	0	F54F11.5	ncRNA	Heterochromatin	Heterochromatin	0	0	0	2	6	ITS_463
II	13536700	13536772	-	6	87.5	72	intron	intron	0	Y48E1B.2	protein_coding	Low signal	Gene body	0	0	1	0	2	ITS_464
II	13540533	13540710	-	16	73.3	177	intron	intron	0	Y48E1B.2	protein_coding	Gene body	Gene body	0	0	1	0	4	ITS_465
II	13576692	13576822	+	12	86.6	130	intron	intron	0	lin-38	protein_coding	Gene body	Gene body	0	0	2	0	2	ITS_466
II	13577355	13577402	-	5	85.4	47	intron	intron	0	lin-38	protein_coding	Gene body	Gene body	0	0	0	0	0	ITS_467
II	13610999	13611065	+	4	84.8	66	intron	intron	0	gst-24	protein_coding	Gene body	Enhancer	0	0	0	0	3	ITS_468
II	13650134	13650212	+	12	98.7	78	intron	intron	0	fbxa-169	protein_coding	Enhancer	Polycomb	0	0	0	0	0	ITS_469
II	13652604	13652877	+	12	66.3	273	intron	intron	0	fbxa-169	protein_coding	Enhancer	Polycomb	0	0	1	1	5	ITS_470
II	13681583	13681768	-	6	48	185	intron	intron	0	rpoa-1	protein_coding	Gene body	Gene body	0	0	0	0	8	ITS_471
II	13706924	13707050	+	9	87.3	126	intron	intron	0	kqt-3	protein_coding	Low signal	Low signal	0	0	1	0	1	ITS_472
II	13715311	13715546	-	16	79.4	235	intron	intron	0	Y54G9A.4	protein_coding	Gene body	Polycomb	0	0	1	0	3	ITS_473
II	13721618	13721767	+	8	81.2	149	intergenic	exon	300	sre-46	protein_coding	Gene body	Heterochromatin	0	0	0	2	21	ITS_474
II	13729964	13730400	-	8	32.8	436	intron	intron	0	Y54G9A.9	protein_coding	Gene body	Gene body	0	0	0	0	5	ITS_475
II	13734585	13734903	+	18	81.6	318	ncrna	ncrna	0	Y54G9A.13	ncRNA	Enhancer	Enhancer	0	0	2	5	27	ITS_476
II	13741899	13742060	+	9	85.2	161	intron	intron	0	mig-14	protein_coding	Gene body	Enhancer	0	0	2	2	5	ITS_477
II	13759543	13759634	-	4	78.1	91	intron	intron	0	arrd-13	protein_coding	Gene body	Gene body	0	0	0	0	0	ITS_478
II	13759941	13760089	-	11	83.2	148	intron	intron	0	arrd-13	protein_coding	Gene body	Gene body	0	1	0	0	1	ITS_479
II	13796355	13796715	-	28	89.4	360	intron	intron	0	ZK131.11	protein_coding	Gene body	Enhancer	0	0	0	0	2	ITS_480
II	13806094	13806298	-	17	87.8	204	intron	intron	0	ZK131.11	protein_coding	Low signal	Enhancer	0	0	0	2	2	ITS_481
II	13809651	13809771	+	10	90.8	120	intron	intron	0	ZK131.11	protein_coding	Low signal	Enhancer	0	0	0	0	0	ITS_482
II	13841534	13841869	+	17	83	335	intergenic	5' UTR	395	F08G2.7	protein_coding	Enhancer	Gene body	0	0	0	0	1	ITS_483
II	13857436	13857508	-	7	90.3	72	intron	intron	0	Y51H1A.2	protein_coding	Gene body	Gene body	0	0	3	0	3	ITS_484
II	13870312	13870713	+	6	37.7	401	intron	intron	0	Y51H1A.2	protein_coding	Gene body	Gene body	0	0	0	0	19	ITS_485
II	13870823	13871125	+	5	39.4	302	intron	intron	0	Y51H1A.2	protein_coding	Gene body	Gene body	0	0	0	0	26	ITS_486
II	13873444	13873781	+	6	43.2	337	intron	intron	0	Y51H1A.3	protein_coding	Promoter	Enhancer	0	0	0	0	13	ITS_487
II	13900887	13900941	+	4	87.3	54	intron	intron	0	W02B8.1	protein_coding	Low signal	Enhancer	0	0	0	0	0	ITS_488
II	13905517	13905895	+	31	87.3	378	intergenic	ncrna	0	W02B8.13	ncRNA	Low signal	Enhancer	0	0	1	1	7	ITS_489
II	13909463	13909587	-	5	78.2	124	intron	intron	0	W02B8.2	protein_coding	Gene body	Gene body	0	0	0	2	8	ITS_490
II	13912422	13912581	-	8	73.5	159	intron	intron	0	W02B8.2	protein_coding	Gene body	Gene body	0	1	0	0	2	ITS_491
II	13932176	13932435	-	15	74	259	ncrna	ncrna	0	W02B8.7	ncRNA	Polycomb	Polycomb	0	0	0	0	1	ITS_492
II	13934641	13934796	-	9	83.5	155	intergenic	ncrna	675	W07G1.14	ncRNA	Polycomb	Polycomb	0	0	0	0	1	ITS_493
II	13935419	13935683	+	17	82.3	264	ncrna	ncrna	0	W07G1.16	ncRNA	Low signal	Polycomb	0	0	0	0	0	ITS_494
II	13974169	13974439	+	12	78.9	270	intron	intron	0	Y39G8B.12	ncRNA	Gene body	Gene body	0	0	2	1	6	ITS_495
II	13975511	13975795	+	12	76.9	284	intron	intron	0	Y39G8B.2	protein_coding	Gene body	Gene body	0	0	0	0	0	ITS_496
II	14006885	14006981	+	8	88.5	96	intron	intron	0	F01D5.6	protein_coding	Low signal	Polycomb	0	0	0	0	0	ITS_497
II	14023981	14024064	+	8	88.1	83	intergenic	exon	3036	F01D5.10	protein_coding	Gene body	Polycomb	0	0	0	0	3	ITS_498
II	14027139	14027211	+	6	88.9	72	intergenic	peseudogene_exon	4190	W01G7.2	pseudogene	Enhancer	Enhancer	0	0	0	0	0	ITS_499
II	14037211	14037271	-	5	86.7	60	intron	intron	0	daf-5	protein_coding	Polycomb	Gene body	0	0	0	0	0	ITS_500
II	14116805	14116907	-	9	90.2	102	intron	intron	0	K09E4.4	protein_coding	Gene body	Polycomb	0	0	0	0	0	ITS_501
II	14117028	14117282	-	14	67.4	254	intron	intron	0	K09E4.4	protein_coding	Gene body	Polycomb	0	0	0	0	0	ITS_502
II	14119021	14119111	+	7	85.6	90	intron	intron	0	K09E4.4	protein_coding	Low signal	Polycomb	0	0	0	0	0	ITS_503
II	14122812	14122884	+	5	84.7	72	intergenic	5' UTR	647	K09E4.4	protein_coding	Low signal	Polycomb	0	0	0	2	8	ITS_504
II	14193966	14194086	+	7	84.2	120	intergenic	ncrna	2359	Y48B6A.19	ncRNA	Low signal	Low signal	0	0	0	0	0	ITS_505
II	14201188	14201260	-	7	87.5	72	intron	intron	0	ace-4	protein_coding	Low signal	Low signal	0	0	0	0	0	ITS_506
II	14206326	14206598	-	20	86.2	272	intron	ncrna	0	Y48B6A.22	ncRNA	Polycomb	Polycomb	0	0	0	2	4	ITS_507
II	14208334	14208656	+	25	87	322	intron	ncrna	0	Y48B6A.20	ncRNA	Polycomb	Polycomb	0	1	1	1	4	ITS_508
II	14286551	14286818	+	11	79.9	267	intron	intron	0	srh-41	protein_coding	Polycomb	Polycomb	0	0	0	0	0	ITS_509
II	14374617	14374882	+	15	82.1	265	intron	intron	0	acr-20	protein_coding	Gene body	Gene body	0	0	2	0	9	ITS_510
II	14630269	14630377	-	4	78.7	108	intergenic	3' UTR	147	tag-297	protein_coding	Polycomb	Polycomb	0	0	0	0	1	ITS_511
II	14670613	14670715	-	6	81.4	102	intergenic	5' UTR	3670	unc-52	protein_coding	Heterochromatin	Gene body	0	0	0	0	0	ITS_512
II	14791624	14791858	+	6	42.8	234	intron	intron	0	Y54E2A.10	protein_coding	Polycomb	Heterochromatin	0	0	0	0	5	ITS_513
II	14819137	14819179	-	5	95.2	42	intron	intron	0	nhr-61	protein_coding	Enhancer	Enhancer	0	0	0	0	1	ITS_514
II	14819688	14819946	-	18	86	258	intron	intron	0	nhr-61	protein_coding	Enhancer	Enhancer	0	0	0	3	3	ITS_515
II	14892243	14892363	-	7	81.1	120	intergenic	ncrna	1382	Y53F4A.5	ncRNA	Low signal	Polycomb	0	0	0	1	1	ITS_516
II	14893693	14893948	+	15	74.8	255	intergenic	ncrna	0	Y53F4A.4	ncRNA	Low signal	Polycomb	0	0	0	0	0	ITS_517
II	14913825	14913915	-	8	87.8	90	intergenic	exon	3424	R03C1.1	protein_coding	Low signal	Polycomb	0	0	0	0	0	ITS_518
II	14955295	14955367	-	9	95.8	72	intron	ncrna	0	Y53F4B.57	ncRNA	Low signal	Polycomb	0	1	0	0	2	ITS_519
II	15145551	15145673	+	9	78.4	122	ncrna	ncrna	0	Y53F4B.56	ncRNA	Low signal	Polycomb	0	0	0	0	0	ITS_520
II	15158414	15158636	-	15	84.3	222	intron	intron	0	ptr-20	protein_coding	Low signal	Polycomb	0	0	0	1	1	ITS_521
II	15159903	15159975	-	5	84.7	72	intron	intron	0	ptr-20	protein_coding	Gene body	Polycomb	0	0	0	0	0	ITS_522
II	15161593	15161653	-	6	88.3	60	intron	intron	0	ptr-20	protein_coding	Low signal	Polycomb	0	0	0	0	0	ITS_523
II	15175510	15175552	+	5	95.2	42	intergenic	5' UTR	390	Y53F4B.36	protein_coding	Low signal	Low signal	0	0	0	0	0	ITS_524
II	15179330	15179390	-	4	88.3	60	intergenic	exon	580	gst-34	protein_coding	Low signal	Low signal	0	0	1	0	1	ITS_525
II	15204162	15204348	-	10	84.4	186	intergenic	ncrna	2484	Y46E12BR.2	ncRNA	Low signal	Enhancer	0	0	2	1	6	ITS_526
II	15209044	15209173	+	12	76.6	129	intron	intron	0	spsb-1	protein_coding	Gene body	Enhancer	0	0	0	0	2	ITS_527
II	15247899	15248007	-	8	85.2	108	intron	intron	0	tig-3	protein_coding	Low signal	Low signal	0	0	0	0	0	ITS_528
II	15248601	15248787	+	8	81.7	186	intron	intron	0	tig-3	protein_coding	Low signal	Low signal	0	0	0	1	1	ITS_529
II	15253424	15253873	-	20	69.3	449	intergenic	ncrna	0	Y46E12BL.6	ncRNA	Gene body	Polycomb	0	0	0	0	0	ITS_530
II	15254957	15255624	+	42	82.4	667	intergenic	ncrna	0	Y46E12BL.8	ncRNA	Gene body	Enhancer	0	1	1	0	2	ITS_531
III	66424	66559	+	8	74.8	135	intergenic	5' UTR	163	pck-1	protein_coding	Heterochromatin	Promoter	0	0	0	0	0	ITS_532
III	118095	118179	-	10	89.3	84	intron	intron	0	C29F9.5	protein_coding	Heterochromatin	Heterochromatin	0	0	0	0	0	ITS_533
III	207302	207422	+	9	88.3	120	intron	ncrna	0	W10C4.2	ncRNA	Polycomb	Polycomb	0	0	1	1	6	ITS_534
III	209258	209638	-	12	58.3	380	intron	intron	0	F40G9.17	protein_coding	Polycomb	Polycomb	0	1	0	1	19	ITS_535
III	300054	300181	-	4	66.9	127	intron	intron	0	Y50D7A.1	protein_coding	Heterochromatin	Heterochromatin	0	0	0	0	9	ITS_536
III	437559	437799	+	13	83	240	intron	intron	0	Y55B1BR.2	protein_coding	Gene body	Gene body	0	0	0	0	1	ITS_537
III	460536	460643	-	6	80.6	107	intron	intron	0	Y55B1BR.6	protein_coding	Heterochromatin	Polycomb	0	0	0	1	22	ITS_538
III	635770	635920	+	7	83.3	150	intron	intron	0	T19C3.7	protein_coding	Gene body	Gene body	0	0	0	0	1	ITS_539
III	655845	655905	-	4	90	60	intergenic	3' UTR	1382	orai-1	protein_coding	Polycomb	Enhancer	0	0	8	3	41	ITS_540
III	738215	738323	-	5	76.9	108	intron	intron	0	pat-12	protein_coding	Heterochromatin	Gene body	0	0	0	0	0	ITS_541
III	951041	951153	-	9	83.3	112	intron	ncrna	0	T12B5.17	ncRNA	Polycomb	Promoter	0	8	8	7	70	ITS_542
III	952736	952878	-	8	78.5	142	intron	intron	0	fbxa-10	protein_coding	Enhancer	Promoter	0	0	1	4	19	ITS_543
III	953856	953988	-	7	76.1	132	intergenic	exon	53	fbxa-10	protein_coding	Heterochromatin	Gene body	0	1	11	27	406	ITS_544
III	974752	974908	-	11	87.8	156	intron	intron	0	R06B10.2	protein_coding	Heterochromatin	Heterochromatin	0	0	0	2	5	ITS_545
III	975738	975792	-	5	88.9	54	intron	intron	0	R06B10.2	protein_coding	Heterochromatin	Heterochromatin	0	0	0	0	0	ITS_546
III	981334	981370	-	4	88.9	36	intron	intron	0	tbc-10	protein_coding	Enhancer	Enhancer	0	0	0	0	1	ITS_547
III	1025526	1025688	-	5	77.6	162	intergenic	ncrna	625	Y34F4.7	ncRNA	Heterochromatin	Heterochromatin	0	0	1	0	3	ITS_548
III	1026583	1026667	+	8	92.9	84	intergenic	3' UTR	0	Y34F4.5	protein_coding	Gene body	Heterochromatin	0	0	0	4	6	ITS_549
III	1052410	1052638	-	17	86	228	intron	ncrna	0	BE0003N10.5	ncRNA	Gene body	Polycomb	0	0	0	2	2	ITS_550
III	1068103	1068152	-	4	49	49	intron	intron	0	uaf-1	protein_coding	Gene body	Gene body	0	0	0	0	5	ITS_551
III	1092915	1093241	-	8	45.7	326	intron	intron	0	par-2	protein_coding	Gene body	Heterochromatin	0	0	0	0	22	ITS_552
III	1099494	1099871	+	19	84.7	377	intergenic	ncrna	0	F58B6.8	ncRNA	Gene body	Polycomb	0	0	1	0	1	ITS_553
III	1101152	1101364	+	10	71.4	212	intergenic	ncrna	0	F58B6.9	ncRNA	Gene body	Polycomb	0	0	0	0	2	ITS_554
III	1169740	1169944	-	16	85.8	204	intron	intron	0	cdh-12	protein_coding	Heterochromatin	Heterochromatin	0	3	3	0	7	ITS_555
III	1200631	1200800	+	4	34.8	169	intron	intron	0	mrpl-45	protein_coding	Gene body	Gene body	0	0	0	0	2	ITS_556
III	1256211	1256403	+	13	81.6	192	intron	intron	0	srz-8	protein_coding	Heterochromatin	Heterochromatin	0	0	0	0	1	ITS_557
III	1257451	1257676	+	15	85.5	225	intron	intron	0	fbxa-78	protein_coding	Heterochromatin	Heterochromatin	0	0	0	0	0	ITS_558
III	1264652	1264844	+	13	81.6	192	intron	intron	0	srz-9	protein_coding	Heterochromatin	Heterochromatin	0	0	0	0	0	ITS_559
III	1265892	1266117	+	15	85.5	225	intron	intron	0	fbxa-151	protein_coding	Heterochromatin	Heterochromatin	0	0	1	1	2	ITS_560
III	1330592	1330720	+	8	80.5	128	intron	intron	0	Y82E9BL.18	protein_coding	Heterochromatin	Heterochromatin	0	0	0	0	2	ITS_561
III	1377239	1377311	-	4	80.6	72	intron	intron	0	Y82E9BR.11	protein_coding	Heterochromatin	Heterochromatin	0	0	0	0	0	ITS_562
III	1457340	1457423	+	4	79.8	83	intergenic	exon	1112	Y82E9BR.1	protein_coding	Promoter	Low signal	0	0	0	1	11	ITS_563
III	1557924	1558020	-	8	85.4	96	intron	intron	0	Y67D2.7	protein_coding	Gene body	Gene body	0	0	0	1	2	ITS_564
III	1560620	1561258	-	24	28	638	intron	intron	0	Y67D2.2	protein_coding	Gene body	Gene body	0	0	0	0	4	ITS_565
III	1614108	1614144	-	4	88.9	36	intergenic	5' UTR	75	Y22D7AL.9	protein_coding	Gene body	Enhancer	0	0	0	2	10	ITS_566
III	1686838	1687032	+	10	69.4	194	intron	intron	0	Y22D7AR.16	ncRNA	Heterochromatin	Heterochromatin	0	0	2	0	4	ITS_567
III	1701615	1701675	+	7	91.7	60	intergenic	3' UTR	34	Y22D7AR.10	protein_coding	Polycomb	Heterochromatin	0	0	0	0	3	ITS_568
III	1704006	1704360	-	25	87	354	intron	intron	0	fbxa-13	protein_coding	Heterochromatin	Gene body	0	2	1	1	5	ITS_569
III	1714039	1714561	-	40	89.5	522	intergenic	3' UTR	310	Y22D7AR.2	protein_coding	Heterochromatin	Heterochromatin	0	0	0	0	0	ITS_570
III	1716904	1717626	-	31	80.2	722	pseudogene_intron	ncrna	0	Y22D7AR.18	ncRNA	Heterochromatin	Heterochromatin	0	0	0	1	3	ITS_571
III	1718819	1719153	+	22	84.7	334	pseudogene_intron	pseudogene_intron	0	Y22D7AR.12	pseudogene	Heterochromatin	Heterochromatin	0	0	0	0	0	ITS_572
III	1753039	1753507	-	25	78.9	468	intron	intron	0	Y46E12A.3	protein_coding	Low signal	Heterochromatin	0	0	0	0	0	ITS_573
III	1761966	1762099	+	7	81.5	133	intergenic	exon	1424	cnc-6	protein_coding	Low signal	Low signal	0	0	0	0	0	ITS_574
III	1856267	1856424	+	13	86.6	157	intron	intron	0	hlh-33	protein_coding	Low signal	Enhancer	0	0	1	0	1	ITS_575
III	1881503	1881935	-	24	82.9	432	intron	intron	0	Y39A3CR.8	protein_coding	Heterochromatin	Heterochromatin	0	5	18	20	140	ITS_576
III	1964135	1964961	+	43	77.8	826	intron	ncrna	0	R155.8	ncRNA	Heterochromatin	Heterochromatin	0	0	0	1	5	ITS_577
III	1971836	1971866	-	4	96.7	30	intron	intron	0	R155.3	protein_coding	Heterochromatin	Heterochromatin	0	0	0	0	0	ITS_578
III	2023414	2023822	+	28	84.5	408	intergenic	5' UTR	1825	ckr-2	protein_coding	Low signal	Polycomb	0	0	0	0	1	ITS_579
III	2046645	2046915	-	17	76.5	270	intron	intron	0	dpy-1	protein_coding	Heterochromatin	Heterochromatin	0	0	3	0	5	ITS_580
III	2060095	2060389	-	19	79.9	294	intergenic	ncrna	0	Y39A3A.9	ncRNA	Heterochromatin	Heterochromatin	0	0	0	0	1	ITS_581
III	2083441	2083708	+	6	53.7	267	intron	intron	0	cpt-3	protein_coding	Heterochromatin	Heterochromatin	0	0	0	0	0	ITS_582
III	2103186	2103654	-	15	49.3	468	intron	intron	0	ppk-2	protein_coding	Gene body	Gene body	0	0	0	0	5	ITS_583
III	2276103	2276257	-	9	80.8	154	intron	ncrna	0	Y54F10BM.19	ncRNA	Low signal	Heterochromatin	0	0	0	0	0	ITS_584
III	2438239	2438335	-	6	85.4	96	exon	exon	0	E02H9.6	protein_coding	Heterochromatin	Gene body	0	1	1	0	4	ITS_585
III	2455328	2455930	+	27	71.9	602	intergenic	5' UTR	249	E02H9.4	protein_coding	Polycomb	Polycomb	0	0	0	0	4	ITS_586
III	2456598	2456742	-	6	81.9	144	intron	intron	0	E02H9.4	protein_coding	Polycomb	Heterochromatin	0	0	0	0	1	ITS_587
III	2466956	2467095	-	5	64.9	139	intergenic	exon	156	E02H9.2	protein_coding	Heterochromatin	Heterochromatin	0	1	0	1	62	ITS_588
III	2467559	2467589	+	4	96.7	30	intron	intron	0	E02H9.9	protein_coding	Heterochromatin	Heterochromatin	0	3	0	1	23	ITS_589
III	2506346	2506382	-	4	88.9	36	intron	intron	0	Y54F10AM.8	protein_coding	Polycomb	Heterochromatin	0	0	0	0	1	ITS_590
III	2507597	2507694	+	6	71.8	97	intron	intron	0	Y54F10AM.8	protein_coding	Polycomb	Polycomb	0	1	0	0	1	ITS_591
III	2555963	2556107	-	10	85.5	144	intron	ncrna	0	Y54F10AM.13	ncRNA	Low signal	Gene body	0	0	0	0	1	ITS_592
III	2562593	2562845	+	9	79.1	252	intron	intron	0	nhr-239	protein_coding	Gene body	Polycomb	0	0	2	1	19	ITS_593
III	2577988	2578222	+	12	84.6	234	intergenic	exon	1091	Y71H2B.8	protein_coding	Enhancer	Enhancer	0	0	0	0	0	ITS_594
III	2630756	2630948	+	13	84.4	192	intron	intron	0	Y71H2B.1	protein_coding	Polycomb	Polycomb	0	0	0	0	0	ITS_595
III	2637158	2637298	-	7	78.9	140	intron	intron	0	H19M22.3	protein_coding	Polycomb	Polycomb	0	0	0	0	0	ITS_596
III	2637435	2637501	-	8	87.9	66	intron	intron	0	H19M22.3	protein_coding	Polycomb	Polycomb	0	0	0	0	0	ITS_597
III	2641753	2642173	-	24	83.1	420	intron	ncrna	0	H19M22.6	ncRNA	Polycomb	Gene body	0	0	0	0	0	ITS_598
III	2647316	2647460	-	10	86.8	144	intergenic	ncrna	885	H19M22.7	ncRNA	Gene body	Enhancer	0	0	0	0	0	ITS_599
III	2675496	2675778	+	16	85.8	282	intron	intron	0	let-805	protein_coding	Heterochromatin	Heterochromatin	0	0	0	1	3	ITS_600
III	2683507	2683708	+	13	85.9	201	intron	intron	0	Y71H2AL.3	ncRNA	Heterochromatin	Gene body	1	0	0	1	4	ITS_601
III	2712481	2712517	+	4	91.7	36	intron	intron	0	Y71H2AM.10	protein_coding	Polycomb	Gene body	0	0	0	0	0	ITS_602
III	2740247	2740271	-	4	100	24	intergenic	5' UTR	716	Y71H2AM.13	protein_coding	Enhancer	Low signal	0	0	0	1	5	ITS_603
III	2743533	2743651	-	8	85	118	intergenic	3' UTR	67	Y71H2AM.14	protein_coding	Low signal	Polycomb	0	2	2	1	15	ITS_604
III	2755385	2755520	-	8	81.9	135	intron	intron	0	Y71H2AM.15	protein_coding	Gene body	Polycomb	0	0	0	0	0	ITS_605
III	2757490	2757806	-	20	80.9	316	intron	intron	0	pho-9	protein_coding	Polycomb	Polycomb	2	0	3	1	7	ITS_606
III	2794898	2794954	-	6	88.3	56	intron	intron	0	twk-45	protein_coding	Enhancer	Heterochromatin	0	0	0	0	0	ITS_607
III	2876406	2876610	-	14	82.4	204	intron	intron	0	klf-1	protein_coding	Gene body	Gene body	0	1	0	0	4	ITS_608
III	2937858	2938174	-	20	84.3	316	intron	intron	0	R10F2.6	protein_coding	Heterochromatin	Heterochromatin	0	1	2	1	5	ITS_609
III	3055966	3056320	-	17	82.3	354	intron	intron	0	H06I04.5	protein_coding	Polycomb	Heterochromatin	0	0	0	0	0	ITS_610
III	3273633	3273856	-	6	57.9	223	intron	intron	0	Y53G8AM.8	protein_coding	Polycomb	Heterochromatin	0	0	0	0	35	ITS_611
III	3343020	3343152	+	7	82.6	132	intergenic	exon	1722	gei-1	protein_coding	Low signal	Enhancer	0	0	0	0	1	ITS_612
III	3346757	3346948	+	19	89.5	191	intron	ncrna	0	F45H7.15	ncRNA	Polycomb	Gene body	0	1	0	0	1	ITS_613
III	3383786	3383996	-	11	83.3	210	intron	intron	0	hecw-1	protein_coding	Polycomb	Polycomb	0	0	1	0	1	ITS_614
III	3435600	3435660	-	5	85	60	intergenic	ncrna	1565	K01A11.8	ncRNA	Gene body	Enhancer	0	0	0	0	1	ITS_615
III	3441934	3441983	-	4	85.7	49	intron	intron	0	spe-41	protein_coding	Polycomb	Heterochromatin	0	0	1	1	2	ITS_616
III	3472296	3472505	+	13	83.8	209	intron	intron	0	rsu-1	protein_coding	Gene body	Gene body	0	0	1	2	6	ITS_617
III	3477423	3477649	-	15	77.8	226	intergenic	ncrna	0	C34C12.11	ncRNA	Gene body	Low signal	0	0	0	0	0	ITS_618
III	3559388	3559472	+	7	86.9	84	intergenic	exon	2761	C54C6.4	protein_coding	Low signal	Low signal	0	0	0	0	0	ITS_619
III	3601735	3601765	+	5	100	30	intron	intron	0	ptp-1	protein_coding	Enhancer	Enhancer	0	0	0	0	0	ITS_620
III	3669942	3670002	+	4	88.3	60	intron	intron	0	C46F11.6	protein_coding	Enhancer	Gene body	0	0	0	0	0	ITS_621
III	3684604	3684708	-	8	79.8	104	intron	intron	0	npr-15	protein_coding	Low signal	Low signal	0	0	0	0	0	ITS_622
III	3745020	3745105	+	5	79.1	85	intergenic	exon	355	lin-48	protein_coding	Low signal	Polycomb	0	0	0	0	0	ITS_623
III	3785148	3785208	-	5	83.3	60	intron	ncrna	0	T24A11.11	ncRNA	Enhancer	Enhancer	0	0	0	0	4	ITS_624
III	3788364	3788456	-	6	80.2	92	intergenic	3' UTR	1525	mtm-3	protein_coding	Low signal	Enhancer	0	0	0	0	1	ITS_625
III	3789185	3789239	+	4	87	54	intergenic	3' UTR	742	mtm-3	protein_coding	Low signal	Enhancer	0	0	0	0	1	ITS_626
III	3809886	3809924	+	4	85.7	38	intergenic	5' UTR	856	toh-1	protein_coding	Low signal	Enhancer	0	0	0	0	2	ITS_627
III	3811860	3811939	+	6	86.1	79	intergenic	3' UTR	1613	dpy-27	protein_coding	Low signal	Enhancer	0	0	1	2	7	ITS_628
III	3815807	3815902	-	5	72.6	95	intron	intron	0	dpy-27	protein_coding	Gene body	Gene body	0	0	0	0	2	ITS_629
III	3936180	3936300	+	5	79.2	120	intergenic	5' UTR	272	nlp-10	protein_coding	Low signal	Low signal	0	0	0	0	0	ITS_630
III	3995251	3995392	-	10	86.3	141	intergenic	5' UTR	3077	glb-11	protein_coding	Low signal	Enhancer	0	0	0	0	0	ITS_631
III	4069041	4069185	-	10	84.7	144	intron	intron	0	unc-79	protein_coding	Low signal	Enhancer	0	0	0	0	0	ITS_632
III	4070015	4070087	+	4	79.2	72	intron	intron	0	unc-79	protein_coding	Low signal	Enhancer	0	0	0	0	1	ITS_633
III	4100359	4100481	+	6	80.2	122	intergenic	5' UTR	2226	C03C10.4	protein_coding	Enhancer	Enhancer	0	0	1	0	2	ITS_634
III	4124503	4124580	+	6	80.8	77	intron	intron	0	unc-103	protein_coding	Low signal	Enhancer	0	0	0	0	0	ITS_635
III	4136986	4137052	+	5	84.8	66	intron	intron	0	unc-103	protein_coding	Low signal	Enhancer	0	0	0	0	0	ITS_636
III	4142401	4142454	+	6	94.4	53	intron	ncrna	0	C30D11.5	ncRNA	Low signal	Gene body	0	1	1	1	3	ITS_637
III	4391722	4391752	+	4	96.7	30	intergenic	ncrna	922	B0284.7	ncRNA	Low signal	Gene body	0	0	0	0	0	ITS_638
III	4622822	4622864	+	4	92.9	42	intron	intron	0	F10F2.2	protein_coding	Low signal	Low signal	0	0	0	0	0	ITS_639
III	5355769	5355931	+	4	50.8	162	intergenic	exon	2580	Y32H12A.9	protein_coding	Polycomb	Polycomb	0	0	0	0	0	ITS_640
III	5356705	5356919	+	4	49.6	214	intergenic	exon	3516	Y32H12A.9	protein_coding	Polycomb	Polycomb	0	0	0	0	0	ITS_641
III	5472530	5472578	-	5	93.8	48	intergenic	5' UTR	1899	lon-1	protein_coding	Low signal	Low signal	0	0	0	0	0	ITS_642
III	8486908	8486938	-	4	96.7	30	intron	intron	0	F42H10.3	protein_coding	Gene body	Enhancer	0	0	0	1	1	ITS_643
III	8487062	8487292	-	4	47	230	intron	intron	0	F42H10.3	protein_coding	Gene body	Enhancer	0	0	0	0	0	ITS_644
III	9219951	9220023	+	5	84.7	72	intergenic	5' UTR	4511	npr-29	protein_coding	Low signal	Low signal	0	0	0	0	0	ITS_645
III	9285250	9285345	-	4	85.4	95	intergenic	5' UTR	705	fozi-1	protein_coding	Low signal	Low signal	0	0	0	0	0	ITS_646
III	9498577	9498625	+	4	87.5	48	intron	intron	0	sod-4	protein_coding	Enhancer	Enhancer	0	0	0	1	1	ITS_647
III	9971874	9971982	+	6	83.3	108	intron	intron	0	R10E12.2	protein_coding	Enhancer	Enhancer	0	0	0	0	0	ITS_648
III	9976393	9976482	+	6	73.5	89	intergenic	ncrna	202	R10E12.3	ncRNA	Enhancer	Enhancer	0	0	0	0	1	ITS_649
III	10236499	10236547	+	4	85.4	48	intergenic	5' UTR	2124	Y70G10A.3	protein_coding	Low signal	Low signal	0	0	0	0	0	ITS_650
III	10396421	10396684	+	8	42.5	263	intergenic	5' UTR	340	M03C11.1	protein_coding	Enhancer	Enhancer	0	0	0	0	2	ITS_651
III	10476308	10476431	+	7	76	123	intron	intron	0	D2045.9	protein_coding	Gene body	Gene body	0	0	0	0	3	ITS_652
III	10476555	10476801	+	16	86.2	246	intron	intron	0	D2045.9	protein_coding	Gene body	Gene body	0	0	0	1	3	ITS_653
III	10521288	10521527	-	13	84.6	239	intron	intron	0	unc-49	protein_coding	Gene body	Gene body	0	0	0	0	1	ITS_654
III	10528136	10528226	+	8	87.8	90	intron	intron	0	unc-49	protein_coding	Low signal	Gene body	0	0	0	0	0	ITS_655
III	10539794	10539879	-	4	82.4	85	intergenic	5' UTR	631	T21C12.3	protein_coding	Low signal	Low signal	0	0	0	1	2	ITS_656
III	10544641	10544791	+	9	81.3	150	intergenic	5' UTR	5478	T21C12.3	protein_coding	Gene body	Polycomb	0	0	0	0	0	ITS_657
III	10689537	10689621	+	5	83.3	84	intron	intron	0	Y39A1A.17	protein_coding	Low signal	Low signal	0	0	0	0	0	ITS_658
III	10784571	10784679	-	6	87	108	intron	intron	0	ptr-19	protein_coding	Low signal	Low signal	0	0	0	0	0	ITS_659
III	10862022	10862082	+	6	91.7	60	intron	intron	0	oxi-1	protein_coding	Gene body	Gene body	0	1	0	0	1	ITS_660
III	10882892	10883056	+	9	84.8	164	intron	intron	0	athp-1	protein_coding	Gene body	Gene body	0	0	1	0	1	ITS_661
III	10924760	10924943	+	12	82.4	183	intron	intron	0	vab-7	protein_coding	Gene body	Polycomb	0	0	0	0	1	ITS_662
III	10975227	10975377	+	9	87.3	150	intron	intron	0	dhc-4	protein_coding	Polycomb	Polycomb	0	0	0	0	1	ITS_663
III	11007297	11007351	-	4	87	54	intergenic	3' UTR	63	fipr-17	protein_coding	Enhancer	Low signal	0	0	0	0	0	ITS_664
III	11033558	11033588	+	4	96.7	30	intron	intron	0	Y48A6B.9	protein_coding	Low signal	Polycomb	0	0	0	0	1	ITS_665
III	11172806	11172871	-	6	89.4	65	intron	intron	0	tra-1	protein_coding	Gene body	Gene body	0	0	0	0	0	ITS_666
III	11194204	11194456	-	18	81.5	252	intron	intron	0	tra-1	protein_coding	Gene body	Gene body	0	0	0	0	1	ITS_667
III	11207908	11208130	+	15	86	222	intergenic	3' UTR	8264	tbx-34	protein_coding	Enhancer	Enhancer	0	0	0	3	10	ITS_668
III	11258726	11258895	-	8	84	169	intron	intron	0	obr-1	protein_coding	Gene body	Gene body	0	0	0	0	1	ITS_669
III	11357085	11357221	+	7	67.5	136	intergenic	ncrna	1034	T28D6.12	ncRNA	Low signal	Enhancer	0	0	0	0	0	ITS_670
III	11360667	11360735	+	5	81.9	68	intron	intron	0	T28D6.4	protein_coding	Enhancer	Gene body	0	0	0	0	1	ITS_671
III	11388351	11388448	-	5	77.5	97	intron	ncrna	0	Y47D3B.21	ncRNA	Low signal	Polycomb	0	0	0	0	3	ITS_672
III	11390294	11390333	-	5	81.8	39	intron	intron	0	nlp-21	protein_coding	Low signal	Polycomb	0	0	0	0	0	ITS_673
III	11391569	11391971	-	18	77.1	402	intron	intron	0	nlp-21	protein_coding	Low signal	Polycomb	0	0	0	0	0	ITS_674
III	11392906	11393097	-	14	79.1	191	intron	intron	0	nlp-21	protein_coding	Low signal	Polycomb	0	0	0	0	1	ITS_675
III	11419550	11419903	+	20	86.4	353	intron	intron	0	twk-31	protein_coding	Polycomb	Polycomb	0	0	0	0	2	ITS_676
III	11424871	11425159	+	24	86.2	288	intergenic	3' UTR	208	twk-31	protein_coding	Enhancer	Low signal	0	0	0	0	2	ITS_677
III	11475038	11475170	+	12	91.7	132	intergenic	peseudogene_exon	504	Y66A7A.t1	pseudogene	Gene body	Enhancer	0	0	1	0	3	ITS_678
III	11564620	11564837	+	14	86.6	217	intron	ncrna	0	Y66D12A.27	ncRNA	Enhancer	Polycomb	0	0	1	0	3	ITS_679
III	11626110	11626344	-	15	86.4	234	intron	intron	0	gly-8	protein_coding	Gene body	Gene body	1	0	0	1	5	ITS_680
III	11635120	11635276	+	9	85.9	156	intron	intron	0	tbx-33	protein_coding	Low signal	Polycomb	0	0	0	0	1	ITS_681
III	11707251	11707677	+	33	88.3	426	intron	intron	0	Y41C4A.8	protein_coding	Polycomb	Gene body	0	0	2	1	6	ITS_682
III	11707834	11707864	+	4	96.7	30	intron	intron	0	Y41C4A.8	protein_coding	Polycomb	Gene body	0	0	0	0	0	ITS_683
III	11722251	11722430	-	13	87.8	179	intron	ncrna	0	Y41C4A.26	ncRNA	Low signal	Polycomb	0	0	0	0	1	ITS_684
III	11737197	11737305	-	9	90.8	108	intron	intron	0	sup-1	protein_coding	Low signal	Gene body	3	2	0	0	6	ITS_685
III	11783209	11783374	-	4	83.3	165	intron	intron	0	srd-74	protein_coding	Low signal	Polycomb	0	0	0	1	2	ITS_686
III	11784832	11784904	-	10	97.2	72	intron	intron	0	tbx-38	protein_coding	Gene body	Polycomb	0	0	0	0	0	ITS_687
III	11785052	11785100	-	5	93.8	48	intron	intron	0	tbx-38	protein_coding	Gene body	Polycomb	0	0	0	0	0	ITS_688
III	11786310	11786478	+	8	82.9	168	intergenic	exon	258	tbx-38	protein_coding	Gene body	Polycomb	0	0	0	0	0	ITS_689
III	11786596	11786692	+	6	84.4	96	intergenic	exon	544	tbx-38	protein_coding	Gene body	Polycomb	0	0	0	1	3	ITS_690
III	11818617	11818834	-	5	55.3	217	intron	intron	0	C18D11.1	protein_coding	Gene body	Gene body	0	0	0	0	4	ITS_691
III	11820531	11820651	-	5	72.6	120	intron	intron	0	maa-1	protein_coding	Gene body	Gene body	0	0	0	1	9	ITS_692
III	11947325	11947427	+	8	84.3	102	intergenic	5' UTR	308	Y56A3A.7	protein_coding	Enhancer	Promoter	0	0	0	0	1	ITS_693
III	11962381	11962655	+	5	43.1	274	intron	intron	0	Y56A3A.28	protein_coding	Gene body	Gene body	0	0	0	0	5	ITS_694
III	11963096	11963256	+	5	45.3	160	intron	intron	0	Y56A3A.28	protein_coding	Gene body	Gene body	0	0	0	0	8	ITS_695
III	12015185	12015551	-	28	88.5	366	intergenic	ncrna	0	Y79H2A.13	ncRNA	Low signal	Enhancer	0	0	0	0	0	ITS_696
III	12072369	12072891	+	13	38.3	522	intergenic	3' UTR	93	zyg-8	protein_coding	Gene body	Enhancer	0	0	0	0	44	ITS_697
III	12073013	12073793	+	17	40.3	780	intergenic	3' UTR	496	php-3	protein_coding	Gene body	Enhancer	0	0	0	0	1	ITS_698
III	12085861	12085993	+	4	53.8	132	intergenic	5' UTR	1541	nob-1	protein_coding	Enhancer	Polycomb	0	0	0	0	3	ITS_699
III	12102828	12102906	-	5	88.5	78	intron	intron	0	Y75B8A.3	protein_coding	Polycomb	Polycomb	0	0	0	0	0	ITS_700
III	12104459	12104525	-	5	89.4	66	intron	intron	0	Y75B8A.3	protein_coding	Polycomb	Polycomb	0	0	0	0	0	ITS_701
III	12104670	12104733	-	5	83.3	63	intron	intron	0	Y75B8A.3	protein_coding	Polycomb	Polycomb	0	0	0	0	0	ITS_702
III	12116658	12116730	+	6	87.5	72	intron	intron	0	Y75B8A.51	ncRNA	Low signal	Low signal	0	0	0	0	1	ITS_703
III	12124509	12124683	+	12	85.1	174	intron	intron	0	Y75B8A.6	protein_coding	Gene body	Gene body	0	0	0	0	1	ITS_704
III	12130511	12130661	-	15	89.3	150	ncrna	ncrna	0	Y75B8A.48	ncRNA	Enhancer	Gene body	0	0	0	0	0	ITS_705
III	12131740	12132376	+	41	81.1	636	intergenic	ncrna	0	Y75B8A.57	ncRNA	Enhancer	Gene body	0	0	0	2	7	ITS_706
III	12135111	12135219	-	10	88	108	intergenic	ncrna	2809	Y75B8A.57	ncRNA	Enhancer	Gene body	0	0	0	0	1	ITS_707
III	12140663	12140805	+	10	81.7	142	intergenic	ncrna	370	Y75B8A.46	ncRNA	Enhancer	Enhancer	0	0	0	0	0	ITS_708
III	12143923	12144025	+	15	98	102	ncrna	ncrna	0	Y75B8A.58	ncRNA	Low signal	Polycomb	0	0	0	0	0	ITS_709
III	12175912	12175948	-	4	94.4	36	intron	intron	0	gly-11	protein_coding	Low signal	Gene body	0	0	0	0	0	ITS_710
III	12196102	12196365	+	16	83.3	263	intron	intron	0	Y75B8A.44	protein_coding	Low signal	Polycomb	0	0	1	0	1	ITS_711
III	12209197	12209434	-	12	79.2	237	intron	ncrna	0	Y75B8A.45	ncRNA	Gene body	Gene body	0	0	0	2	3	ITS_712
III	12212545	12212722	-	10	72.4	177	intron	ncrna	0	Y75B8A.52	ncRNA	Gene body	Gene body	0	0	0	0	0	ITS_713
III	12217535	12217559	-	4	100	24	intron	intron	0	Y75B8A.14	protein_coding	Gene body	Gene body	0	1	0	0	1	ITS_714
III	12218213	12218261	-	5	89.6	48	intron	intron	0	Y75B8A.14	protein_coding	Gene body	Gene body	0	0	0	1	7	ITS_715
III	12230144	12230547	-	22	83.1	403	intron	ncrna	0	Y75B8A.47	ncRNA	Gene body	Gene body	0	0	1	0	5	ITS_716
III	12289166	12289220	+	4	90.7	54	intron	intron	0	mrp-8	protein_coding	Gene body	Polycomb	0	0	0	1	2	ITS_717
III	12302142	12302352	+	13	84.3	210	intron	intron	0	Y75B8A.53	ncRNA	Low signal	Low signal	0	0	0	0	0	ITS_718
III	12318063	12318111	-	4	89.6	48	intergenic	exon	996	Y75B8A.28	protein_coding	Low signal	Polycomb	0	0	0	0	0	ITS_719
III	12394391	12394710	+	12	69.3	319	pseudogene_intron	pseudogene_intron	0	wht-9	pseudogene	Polycomb	Polycomb	0	1	0	2	21	ITS_720
III	12473621	12473879	-	18	87.2	258	intron	ncrna	0	Y49E10.34	ncRNA	Low signal	Gene body	0	0	0	0	0	ITS_721
III	12476251	12476329	+	4	84.6	78	intron	intron	0	cccp-1	protein_coding	Low signal	Gene body	0	0	0	0	2	ITS_722
III	12479112	12479142	+	4	90	30	intron	intron	0	cccp-1	protein_coding	Low signal	Low signal	0	0	0	0	0	ITS_723
III	12489349	12489427	-	8	91	78	intron	ncrna	0	Y49E10.35	ncRNA	Gene body	Heterochromatin	0	0	0	1	2	ITS_724
III	12594119	12594199	-	9	86.2	80	intergenic	3' UTR	1820	Y111B2A.10	protein_coding	Enhancer	Low signal	0	0	0	0	1	ITS_725
III	12595779	12595869	-	5	81.5	90	intergenic	3' UTR	150	Y111B2A.10	protein_coding	Gene body	Gene body	0	0	3	6	31	ITS_726
III	12640708	12640940	+	16	79.9	232	intron	intron	0	pqn-80	protein_coding	Gene body	Gene body	0	0	0	1	11	ITS_727
III	12642435	12643152	+	37	78.2	717	intron	ncrna	0	Y111B2A.31	ncRNA	Gene body	Gene body	0	0	1	2	12	ITS_728
III	12643308	12643426	+	6	73.6	118	intron	intron	0	pqn-80	protein_coding	Gene body	Gene body	0	0	1	0	2	ITS_729
III	12649524	12649642	-	7	69.7	118	intron	intron	0	pqn-80	protein_coding	Low signal	Gene body	0	0	0	0	1	ITS_730
III	12784469	12784829	-	20	82.5	360	intergenic	5' UTR	324	lgc-37	protein_coding	Low signal	Polycomb	0	0	0	0	1	ITS_731
III	12792820	12792934	+	7	82.9	114	intron	intron	0	lgc-37	protein_coding	Polycomb	Polycomb	0	1	1	0	3	ITS_732
III	12797588	12797710	-	4	54.8	122	intron	intron	0	agmo-1	protein_coding	Low signal	Gene body	0	0	0	0	0	ITS_733
III	12798207	12798351	-	9	87.5	144	intergenic	5' UTR	50	agmo-1	protein_coding	Low signal	Gene body	0	0	0	0	0	ITS_734
III	12798719	12798821	+	8	88.2	102	intergenic	5' UTR	562	agmo-1	protein_coding	Low signal	Gene body	0	0	0	0	0	ITS_735
III	12801772	12802018	+	14	82.5	246	ncrna	ncrna	0	BE10.7	ncRNA	Low signal	Polycomb	0	0	0	1	2	ITS_736
III	12822912	12823250	+	27	76.4	338	intron	intron	0	Y37D8A.2	protein_coding	Gene body	Gene body	0	0	0	1	2	ITS_737
III	12838671	12838841	+	7	77.5	170	intron	intron	0	Y37D8A.4	protein_coding	Gene body	Enhancer	0	0	2	0	9	ITS_738
III	12856138	12856366	+	15	79.4	228	intron	intron	0	Y37D8A.26	protein_coding	Low signal	Polycomb	0	1	5	24	74	ITS_739
III	12858121	12858259	-	7	78.3	138	intergenic	ncrna	124	Y37D8A.27	ncRNA	Low signal	Enhancer	0	1	0	1	17	ITS_740
III	12858385	12858505	-	9	85	120	ncrna	ncrna	0	Y37D8A.27	ncRNA	Low signal	Enhancer	0	0	1	1	5	ITS_741
III	12944018	12944078	+	4	85	60	intron	intron	0	unc-25	protein_coding	Low signal	Polycomb	0	0	0	0	0	ITS_742
III	12944425	12944581	-	11	87.8	156	intron	intron	0	unc-25	protein_coding	Low signal	Polycomb	0	0	1	1	3	ITS_743
III	12945115	12945325	+	14	86.2	210	intron	intron	0	unc-25	protein_coding	Low signal	Polycomb	0	0	1	0	1	ITS_744
III	12959017	12959071	+	4	87	54	intron	intron	0	ttm-1	protein_coding	Low signal	Enhancer	0	0	0	0	6	ITS_745
III	12961429	12961519	-	10	88.9	90	intron	intron	0	ttm-1	protein_coding	Low signal	Low signal	0	0	1	0	1	ITS_746
III	13004380	13004626	+	22	88.4	246	intron	intron	0	ZK1010.10	protein_coding	Enhancer	Polycomb	0	7	3	1	11	ITS_747
III	13056347	13056593	-	19	85.9	246	ncrna	ncrna	0	F54F12.5	ncRNA	Polycomb	Low signal	0	0	0	0	1	ITS_748
III	13134211	13134610	+	22	76.3	399	intron	intron	0	bre-2	protein_coding	Low signal	Polycomb	0	0	3	1	6	ITS_749
III	13180078	13180306	+	15	86	228	intergenic	3' UTR	6972	Y39E4B.5	protein_coding	Low signal	Enhancer	0	0	1	0	6	ITS_750
III	13247222	13247407	+	5	41.9	185	intron	intron	0	anoh-1	protein_coding	Low signal	Low signal	0	0	0	0	2	ITS_751
III	13247518	13247720	+	4	44.8	202	intron	intron	0	anoh-1	protein_coding	Low signal	Low signal	0	0	0	0	0	ITS_752
III	13252759	13252999	-	16	73.3	240	intron	intron	0	anoh-1	protein_coding	Low signal	Polycomb	0	3	1	1	7	ITS_753
III	13278802	13278924	+	11	84.9	122	intron	intron	0	unc-64	protein_coding	Low signal	Gene body	0	0	0	0	1	ITS_754
III	13325006	13325066	+	5	90	60	intergenic	exon	167	F53A2.1	protein_coding	Low signal	Low signal	0	0	0	0	0	ITS_755
III	13410208	13410322	-	6	82.5	114	intron	intron	0	myo-6	protein_coding	Heterochromatin	Low signal	0	0	1	4	17	ITS_756
IV	105417	105549	-	4	71.1	132	intron	intron	0	tpa-1	protein_coding	Gene body	Gene body	0	0	0	0	0	ITS_757
IV	154589	154743	-	11	75.3	154	intergenic	3' UTR	1329	Y38C1AA.9	protein_coding	Enhancer	Low signal	0	0	0	0	1	ITS_758
IV	455491	455593	+	7	86.3	102	intergenic	exon	90	M04G7.5	protein_coding	Low signal	Polycomb	0	0	0	0	0	ITS_759
IV	484808	485165	+	23	82.2	357	intergenic	5' UTR	3641	M04G7.3	protein_coding	Low signal	Low signal	0	0	0	0	2	ITS_760
IV	497321	497503	-	9	66	182	intergenic	peseudogene_exon	5511	W03G1.11	pseudogene	Low signal	Low signal	0	0	0	0	0	ITS_761
IV	534785	534929	+	10	84	144	intron	intron	0	glt-7	protein_coding	Low signal	Polycomb	0	0	0	0	0	ITS_762
IV	545958	546110	+	12	87.5	152	ncrna	ncrna	0	F09C11.2	ncRNA	Low signal	Low signal	0	0	0	0	0	ITS_763
IV	555537	555671	-	9	76.6	134	intergenic	ncrna	46	F56A11.13	ncRNA	Enhancer	Low signal	0	0	0	0	1	ITS_764
IV	639108	639174	+	4	83.3	66	intergenic	3' UTR	5143	nhr-76	protein_coding	Low signal	Low signal	0	0	0	0	0	ITS_765
IV	640221	640323	-	7	78.4	102	intergenic	3' UTR	6256	nhr-76	protein_coding	Low signal	Low signal	0	0	0	0	0	ITS_766
IV	640775	640968	+	13	79.8	193	intergenic	3' UTR	6810	nhr-76	protein_coding	Low signal	Polycomb	0	0	0	1	1	ITS_767
IV	715270	715438	-	7	82.8	168	intergenic	exon	1187	clec-164	protein_coding	Low signal	Polycomb	0	0	0	0	0	ITS_768
IV	746897	747173	+	7	75.4	276	intron	intron	0	kvs-5	protein_coding	Low signal	Polycomb	0	0	0	0	2	ITS_769
IV	749259	749313	+	4	87	54	intron	intron	0	kvs-5	protein_coding	Gene body	Polycomb	0	0	0	0	0	ITS_770
IV	779423	779565	-	5	59.2	142	intron	intron	0	ugt-52	protein_coding	Gene body	Polycomb	0	0	0	0	1	ITS_771
IV	828895	828985	-	5	84.4	90	ncrna	ncrna	0	Y55F3BR.18	ncRNA	Promoter	Enhancer	0	0	0	0	1	ITS_772
IV	846284	846320	+	4	89.2	36	intron	intron	0	lgc-33	protein_coding	Polycomb	Polycomb	0	0	1	0	1	ITS_773
IV	856161	856305	+	7	81.2	144	intron	intron	0	Y55F3BR.11	protein_coding	Low signal	Enhancer	0	0	0	0	0	ITS_774
IV	887834	888023	-	12	83.9	189	intron	intron	0	mak-2	protein_coding	Gene body	Gene body	0	0	0	0	1	ITS_775
IV	939834	939900	+	5	84.8	66	intergenic	3' UTR	114	faah-3	protein_coding	Low signal	Low signal	0	0	0	0	0	ITS_776
IV	1053246	1053463	-	10	82.6	217	intron	intron	0	dcap-1	protein_coding	Gene body	Gene body	0	0	0	1	3	ITS_777
IV	1069434	1069494	-	7	93.3	60	intergenic	5' UTR	6247	Y55F3AM.14	protein_coding	Polycomb	Enhancer	0	0	0	0	0	ITS_778
IV	1071380	1071476	+	9	89.6	96	intergenic	3' UTR	6013	csn-4	protein_coding	Polycomb	Enhancer	0	0	1	0	1	ITS_779
IV	1073301	1073358	-	5	78.9	57	intergenic	3' UTR	4131	csn-4	protein_coding	Polycomb	Low signal	0	0	0	0	0	ITS_780
IV	1103301	1103381	-	4	76.5	80	intergenic	exon	159	C44B12.9	protein_coding	Gene body	Heterochromatin	0	0	0	0	5	ITS_781
IV	1113330	1113366	-	4	72.5	36	intron	intron	0	srx-14	protein_coding	Low signal	Low signal	0	0	0	0	0	ITS_782
IV	1119184	1119250	+	5	86.4	66	intergenic	exon	518	srx-13	protein_coding	Low signal	Low signal	0	0	0	0	0	ITS_783
IV	1128212	1128332	+	12	89.2	120	intron	intron	0	perm-2	protein_coding	Polycomb	Polycomb	0	0	0	0	0	ITS_784
IV	1131474	1131623	-	8	67.7	149	intron	intron	0	C44B12.6	protein_coding	Low signal	Heterochromatin	0	0	0	0	0	ITS_785
IV	1141973	1142069	+	10	88.5	96	ncrna	ncrna	0	C44B12.11	ncRNA	Low signal	Low signal	0	0	0	0	0	ITS_786
IV	1142654	1142810	-	9	82.7	156	intergenic	ncrna	570	C44B12.11	ncRNA	Low signal	Low signal	0	0	1	0	3	ITS_787
IV	1217247	1217896	+	40	82.7	649	intron	intron	0	W09G12.9	protein_coding	Gene body	Gene body	0	0	1	2	4	ITS_788
IV	1231102	1231513	+	15	76.8	411	intergenic	3' UTR	307	W09G12.7	protein_coding	Polycomb	Polycomb	0	0	0	4	21	ITS_789
IV	1237271	1237343	-	4	81.9	72	intron	intron	0	F38A1.8	protein_coding	Gene body	Gene body	0	0	0	0	1	ITS_790
IV	1237654	1237719	-	6	87.9	65	intron	intron	0	F38A1.8	protein_coding	Gene body	Gene body	0	0	0	0	0	ITS_791
IV	1237841	1237889	-	4	85.4	48	intron	intron	0	F38A1.8	protein_coding	Gene body	Gene body	0	0	0	0	1	ITS_792
IV	1238014	1238057	-	5	90.7	43	intron	intron	0	F38A1.8	protein_coding	Gene body	Gene body	0	0	0	0	0	ITS_793
IV	1348002	1348094	+	7	83.3	92	intron	intron	0	rfc-2	protein_coding	Gene body	Gene body	0	0	2	1	6	ITS_794
IV	1355998	1356126	+	11	83.3	128	intergenic	peseudogene_exon	512	F58F6.t1	pseudogene	Low signal	Low signal	0	0	0	0	0	ITS_795
IV	1356396	1356450	+	4	87	54	intergenic	ncrna	285	21ur-13561	piRNA	Low signal	Low signal	0	0	0	0	0	ITS_796
IV	1367067	1367162	-	8	87.5	95	intergenic	peseudogene_exon	1805	F58F6.t2	pseudogene	Low signal	Low signal	0	0	0	0	0	ITS_797
IV	1424543	1424742	+	4	55.8	199	intron	intron	0	Y77E11A.8	protein_coding	Heterochromatin	Heterochromatin	0	0	0	0	157	ITS_798
IV	1426924	1427132	+	7	66.7	208	intergenic	exon	37	clec-171	protein_coding	Heterochromatin	Heterochromatin	0	0	0	4	38	ITS_799
IV	1525446	1525500	-	4	87	54	intron	intron	0	K03H6.1	protein_coding	Polycomb	Heterochromatin	0	0	0	0	0	ITS_800
IV	1525664	1525765	-	6	77.5	101	intron	intron	0	K03H6.1	protein_coding	Polycomb	Heterochromatin	0	0	0	1	8	ITS_801
IV	1538070	1538190	+	13	92.5	120	ncrna	ncrna	0	K03H6.11	ncRNA	Low signal	Polycomb	0	0	0	1	3	ITS_802
IV	1628396	1628557	+	11	87	161	intron	ncrna	0	Y41D4B.29	ncRNA	Low signal	Gene body	0	1	0	0	4	ITS_803
IV	1632681	1632855	+	13	87.9	174	intron	intron	0	Y41D4B.26	protein_coding	Low signal	Low signal	0	0	0	0	0	ITS_804
IV	1647614	1647656	+	4	84.1	42	intergenic	ncrna	673	Y41D4B.25	ncRNA	Gene body	Enhancer	0	0	0	0	6	ITS_805
IV	1673387	1673744	-	17	70.9	357	intron	intron	0	Y41D4B.1	protein_coding	Low signal	Polycomb	0	0	0	0	0	ITS_806
IV	1674607	1674673	+	5	86.4	66	intron	intron	0	Y41D4B.1	protein_coding	Low signal	Polycomb	0	0	0	0	0	ITS_807
IV	1676971	1677073	+	11	92.2	102	intron	intron	0	Y41D4B.30	ncRNA	Low signal	Polycomb	0	0	0	0	0	ITS_808
IV	1689058	1689326	-	19	85.6	268	ncrna	ncrna	0	Y41D4B.28	ncRNA	Low signal	Polycomb	0	0	0	0	0	ITS_809
IV	1702886	1702916	+	4	96.7	30	intergenic	3' UTR	66	bus-2	protein_coding	Gene body	Polycomb	0	0	0	0	0	ITS_810
IV	1705969	1706167	+	16	85.9	198	intergenic	exon	1129	K08D12.4	protein_coding	Enhancer	Polycomb	0	0	0	2	3	ITS_811
IV	1724639	1724735	-	6	84.4	96	intergenic	exon	496	K08D12.7	protein_coding	Polycomb	Polycomb	0	0	0	0	1	ITS_812
IV	1752185	1752299	-	8	86.8	114	intergenic	exon	157	Y41D4A.7	protein_coding	Gene body	Enhancer	0	1	11	22	59	ITS_813
IV	1785150	1785276	+	8	84.1	126	intergenic	exon	3588	frpr-19	protein_coding	Heterochromatin	Enhancer	0	0	0	1	3	ITS_814
IV	1785390	1785486	+	8	88.5	96	intergenic	exon	3828	frpr-19	protein_coding	Heterochromatin	Enhancer	0	0	0	3	7	ITS_815
IV	1801821	1801922	+	6	84.3	101	intergenic	3' UTR	103	Y38C1BA.1	protein_coding	Low signal	Low signal	0	0	0	0	0	ITS_816
IV	1808828	1808864	-	5	97.2	36	intron	intron	0	snn-1	protein_coding	Low signal	Low signal	0	0	0	0	0	ITS_817
IV	1812819	1812915	-	7	86.5	96	intron	intron	0	snn-1	protein_coding	Low signal	Enhancer	0	0	0	0	0	ITS_818
IV	1826552	1826672	-	10	82	120	intron	intron	0	cmk-1	protein_coding	Gene body	Enhancer	0	0	0	0	0	ITS_819
IV	1887449	1887764	-	15	78.6	315	intergenic	3' UTR	6858	egl-4	protein_coding	Low signal	Polycomb	0	0	0	0	2	ITS_820
IV	1890245	1890359	-	8	85.1	114	intergenic	3' UTR	9654	egl-4	protein_coding	Low signal	Polycomb	0	0	0	0	0	ITS_821
IV	1902960	1903281	-	27	86.8	321	intron	intron	0	egl-18	protein_coding	Gene body	Enhancer	0	2	5	2	21	ITS_822
IV	1903407	1903547	-	7	68.8	140	intron	intron	0	egl-18	protein_coding	Gene body	Enhancer	0	0	3	1	16	ITS_823
IV	1920563	1920827	+	15	83	264	intron	intron	0	elt-6	protein_coding	Gene body	Gene body	0	0	0	0	2	ITS_824
IV	1972449	1972672	+	14	80.4	223	intergenic	exon	78	Y76B12C.4	protein_coding	Gene body	Enhancer	0	0	0	5	13	ITS_825
IV	2043902	2044034	-	5	55.1	132	intergenic	ncrna	644	Y76B12C.10	ncRNA	Heterochromatin	Heterochromatin	0	0	0	1	2	ITS_826
IV	2119181	2119337	+	13	90.4	156	ncrna	ncrna	0	C23H5.14	ncRNA	Low signal	Low signal	0	1	0	2	5	ITS_827
IV	2217954	2218199	-	11	80.2	245	intergenic	5' UTR	1093	T04C4.3	protein_coding	Polycomb	Enhancer	0	0	2	1	21	ITS_828
IV	2228425	2228963	+	21	74	538	intron	intron	0	T04C4.1	protein_coding	Gene body	Gene body	0	0	1	0	9	ITS_829
IV	2326119	2326209	+	4	79.3	90	intron	intron	0	nsy-4	protein_coding	Heterochromatin	Gene body	0	0	0	3	47	ITS_830
IV	2403404	2403744	-	21	85.1	340	intron	ncrna	0	Y38F2AR.20	ncRNA	Gene body	Heterochromatin	0	0	1	4	10	ITS_831
IV	2407753	2407861	+	5	70.5	108	intron	intron	0	Y38F2AR.12	protein_coding	Enhancer	Enhancer	0	0	0	1	20	ITS_832
IV	2541628	2541893	-	17	79.4	265	intergenic	exon	432	sprr-3	protein_coding	Low signal	Heterochromatin	0	0	0	0	3	ITS_833
IV	2623355	2623664	+	12	76.2	309	intron	intron	0	smf-3	protein_coding	Low signal	Polycomb	0	0	0	0	0	ITS_834
IV	2701999	2702801	+	16	56.2	802	intron	intron	0	Y94H6A.13	ncRNA	Gene body	Gene body	0	0	0	0	38	ITS_835
IV	2859311	2859683	-	18	77.9	372	intron	intron	0	Y54G2A.16	protein_coding	Low signal	Polycomb	0	0	0	0	3	ITS_836
IV	2867401	2867514	+	7	86	113	intergenic	exon	2558	Y54G2A.16	protein_coding	Low signal	Low signal	0	0	0	0	0	ITS_837
IV	2970272	2970395	+	6	71.1	123	intron	intron	0	Y54G2A.57	protein_coding	Polycomb	Polycomb	0	0	0	0	1	ITS_838
IV	2974361	2974487	-	7	83.3	126	intron	intron	0	lad-2	protein_coding	Polycomb	Polycomb	0	0	0	0	0	ITS_839
IV	3013241	3013301	+	6	86.7	60	intron	intron	0	Y54G2A.3	protein_coding	Gene body	Polycomb	0	0	0	0	0	ITS_840
IV	3013421	3013823	+	19	62.2	402	intron	intron	0	Y54G2A.3	protein_coding	Gene body	Polycomb	0	0	1	0	2	ITS_841
IV	3019139	3019342	-	9	66.7	203	intergenic	exon	397	lin-22	protein_coding	Enhancer	Polycomb	0	0	0	0	0	ITS_842
IV	3022988	3023127	-	5	82	139	intergenic	3' UTR	267	ndnf-1	protein_coding	Low signal	Polycomb	0	0	2	3	23	ITS_843
IV	3088456	3088546	+	8	87.8	90	intergenic	ncrna	1122	Y67D8C.17	ncRNA	Low signal	Enhancer	0	0	0	0	0	ITS_844
IV	3156157	3156288	+	6	60.3	131	intergenic	exon	170	T23E1.1	protein_coding	Low signal	Enhancer	0	0	0	0	0	ITS_845
IV	3166485	3166638	-	9	76.6	153	intergenic	ncrna	179	T23E1.7	ncRNA	Enhancer	Gene body	0	0	1	2	17	ITS_846
IV	3441298	3441376	+	5	89.7	78	intron	intron	0	grd-10	protein_coding	Polycomb	Polycomb	0	1	0	0	1	ITS_847
IV	3455390	3455822	-	32	88	432	intergenic	peseudogene_exon	70	srz-88	pseudogene	Low signal	Low signal	0	0	1	0	2	ITS_848
IV	3477860	3477949	+	6	68.4	89	intron	intron	0	srz-70	protein_coding	Polycomb	Heterochromatin	0	0	0	0	0	ITS_849
IV	3577829	3577931	+	6	78.3	102	intergenic	exon	199	otpl-1	protein_coding	Low signal	Low signal	0	0	0	1	3	ITS_850
IV	3588788	3588856	-	4	79.2	68	intron	intron	0	taf-2	protein_coding	Gene body	Gene body	0	0	0	0	1	ITS_851
IV	3590526	3590692	-	4	62.7	166	intron	intron	0	taf-2	protein_coding	Gene body	Gene body	0	0	2	2	30	ITS_852
IV	3608665	3608785	+	10	90	120	intron	intron	0	kgb-2	protein_coding	Polycomb	Polycomb	0	0	1	0	2	ITS_853
IV	3611258	3611364	+	4	77.1	106	intron	intron	0	ZC416.6	protein_coding	Gene body	Polycomb	0	0	0	0	0	ITS_854
IV	3617836	3617944	+	8	86.1	108	intron	intron	0	cha-1	protein_coding	Low signal	Polycomb	0	0	0	1	2	ITS_855
IV	3626356	3626410	+	5	85.2	54	intergenic	5' UTR	1659	unc-17	protein_coding	Low signal	Enhancer	0	0	0	0	0	ITS_856
IV	3628134	3628211	+	4	82.1	77	intergenic	5' UTR	3437	unc-17	protein_coding	Low signal	Enhancer	0	0	0	0	1	ITS_857
IV	3656690	3656801	-	8	82.6	111	intergenic	3' UTR	2155	Y37E11AL.6	protein_coding	Gene body	Enhancer	0	0	0	1	1	ITS_858
IV	3666877	3666962	-	6	87.1	85	intron	intron	0	Y37E11AL.6	protein_coding	Low signal	Gene body	0	0	0	0	0	ITS_859
IV	3668359	3668467	-	5	80.7	108	intron	intron	0	Y37E11AL.6	protein_coding	Low signal	Low signal	0	0	0	0	0	ITS_860
IV	3674867	3674891	+	4	100	24	intergenic	ncrna	1166	Y37E11AL.15	ncRNA	Low signal	Low signal	0	0	0	0	0	ITS_861
IV	3704150	3704216	-	5	89.4	66	intergenic	5' UTR	2206	Y37E11AL.12	protein_coding	Low signal	Low signal	0	0	0	0	0	ITS_862
IV	3705408	3705582	+	11	82.2	174	intergenic	5' UTR	3464	Y37E11AL.12	protein_coding	Low signal	Low signal	0	0	0	0	0	ITS_863
IV	3708091	3708247	-	8	86.5	156	intergenic	ncrna	1157	Y37E11AL.14	ncRNA	Low signal	Low signal	0	0	0	0	0	ITS_864
IV	3738277	3738431	+	8	73	154	intron	intron	0	nape-2	protein_coding	Enhancer	Enhancer	0	1	1	3	20	ITS_865
IV	3760527	3760581	+	4	75.9	54	intergenic	3' UTR	590	best-20	protein_coding	Enhancer	Low signal	0	0	0	0	0	ITS_866
IV	3921746	3921864	+	5	58.7	118	intergenic	exon	133	srz-19	protein_coding	Polycomb	Heterochromatin	0	0	0	0	0	ITS_867
IV	3974320	3974625	+	14	81.1	305	intron	intron	0	clec-79	protein_coding	Gene body	Heterochromatin	0	1	1	0	2	ITS_868
IV	3991145	3991271	-	7	85.7	126	intron	intron	0	clec-78	protein_coding	Polycomb	Polycomb	0	0	1	0	1	ITS_869
IV	3994602	3994690	+	7	85.6	88	intron	intron	0	clec-78	protein_coding	Polycomb	Heterochromatin	0	0	0	0	0	ITS_870
IV	3995668	3995998	+	15	69.3	330	intron	intron	0	clec-78	protein_coding	Polycomb	Heterochromatin	0	0	0	0	2	ITS_871
IV	4007183	4007225	-	4	88.1	42	intron	intron	0	W02C12.2	protein_coding	Heterochromatin	Enhancer	0	0	0	0	0	ITS_872
IV	4013536	4013596	-	5	86.7	60	intron	intron	0	clec-78	protein_coding	Heterochromatin	Polycomb	0	0	0	1	2	ITS_873
IV	4055723	4055849	-	9	85.9	126	intergenic	3' UTR	670	W03D2.13	protein_coding	Low signal	Enhancer	0	0	0	0	4	ITS_874
IV	4142051	4142519	+	28	82.1	468	intron	intron	0	F49F1.12	protein_coding	Polycomb	Heterochromatin	0	0	2	2	12	ITS_875
IV	4217102	4217204	+	7	83.5	102	intron	intron	0	F30B5.4	protein_coding	Heterochromatin	Gene body	0	0	0	0	1	ITS_876
IV	4265592	4265633	-	4	86	41	intergenic	exon	172	F36A4.5	protein_coding	Low signal	Polycomb	0	0	0	0	0	ITS_877
IV	4274660	4274732	+	5	84.7	72	intron	intron	0	nhr-78	protein_coding	Gene body	Polycomb	0	0	0	0	0	ITS_878
IV	4459428	4459602	-	14	87.9	174	intron	ncrna	0	R08C7.18	ncRNA	Low signal	Gene body	0	3	0	1	4	ITS_879
IV	4504293	4504354	-	4	74.2	61	intron	intron	0	gbb-2	protein_coding	Low signal	Enhancer	0	0	0	0	0	ITS_880
IV	4504500	4504609	-	6	86.4	109	intron	intron	0	ZK180.11	ncRNA	Low signal	Enhancer	0	0	0	0	1	ITS_881
IV	4526865	4526977	+	9	87.7	112	intergenic	peseudogene_exon	154	ZK185.10	pseudogene	Gene body	Polycomb	0	0	0	0	1	ITS_882
IV	4568379	4568421	-	4	90.5	42	intergenic	ncrna	111	F28E10.12	ncRNA	Gene body	Low signal	0	0	0	0	0	ITS_883
IV	4619096	4619174	-	5	80.8	78	intron	intron	0	F19C7.8	protein_coding	Low signal	Low signal	0	0	0	0	0	ITS_884
IV	4676495	4676635	+	7	82.9	140	intergenic	ncrna	1063	T22B11.9	ncRNA	Low signal	Low signal	0	0	0	0	0	ITS_885
IV	4774060	4774096	+	4	88.9	36	intron	ncrna	0	R11E3.15	ncRNA	Gene body	Polycomb	0	0	0	0	0	ITS_886
IV	5459456	5459529	-	7	85.5	73	pseudogene_intron	pseudogene_intron	0	Y4C6A.1	pseudogene	Gene body	Polycomb	0	0	0	0	0	ITS_887
IV	5969536	5969602	+	4	86.4	66	intron	intron	0	unc-44	protein_coding	Enhancer	Enhancer	0	0	2	1	4	ITS_888
IV	8022460	8022536	-	10	93.6	76	intergenic	3' UTR	182	nhr-31	protein_coding	Low signal	Low signal	0	0	2	0	3	ITS_889
IV	12338259	12338331	+	5	86.1	72	intron	intron	0	wht-5	protein_coding	Low signal	Low signal	0	0	0	0	0	ITS_890
IV	13007418	13007577	+	5	63.2	159	intergenic	5' UTR	1557	mbk-2	protein_coding	Enhancer	Enhancer	0	0	0	0	0	ITS_891
IV	13007860	13008213	+	15	74.7	353	intergenic	5' UTR	921	mbk-2	protein_coding	Gene body	Enhancer	0	0	0	1	3	ITS_892
IV	13069089	13069319	-	9	71.1	230	intron	intron	0	scl-6	protein_coding	Low signal	Polycomb	0	0	0	0	0	ITS_893
IV	13146877	13146913	-	5	91.7	36	intergenic	ncrna	1461	21ur-10402	piRNA	Low signal	Low signal	0	0	0	0	0	ITS_894
IV	13149696	13149780	-	6	86.9	84	intron	intron	0	F09E8.8	protein_coding	Gene body	Low signal	0	0	1	0	5	ITS_895
IV	13335222	13335378	-	7	84.6	156	intergenic	ncrna	1922	W02A2.11	ncRNA	Low signal	Low signal	0	0	0	0	0	ITS_896
IV	13556033	13556170	+	5	74.1	137	intron	intron	0	Y45F10B.13	protein_coding	Low signal	Low signal	0	0	0	0	0	ITS_897
IV	13557291	13557374	-	6	85.7	83	intron	intron	0	Y45F10B.13	protein_coding	Low signal	Low signal	0	0	0	0	0	ITS_898
IV	13562167	13562287	-	10	85.8	120	intron	ncrna	0	Y45F10B.61	ncRNA	Polycomb	Low signal	0	0	0	0	0	ITS_899
IV	14216699	14216760	-	4	81	61	pseudogene_intron	pseudogene_intron	0	F02H6.4	pseudogene	Heterochromatin	Heterochromatin	0	0	0	1	18	ITS_900
IV	14396402	14396438	+	5	97.2	36	intron	intron	0	Y67A10A.9	protein_coding	Low signal	Gene body	0	0	0	0	0	ITS_901
IV	14605711	14605747	+	4	94.4	36	intergenic	ncrna	111	21ur-2459	piRNA	Low signal	Enhancer	0	0	0	1	2	ITS_902
IV	15256361	15256409	-	6	95.8	48	pseudogene_intron	ncrna	0	Y73F8A.1163	ncRNA	Low signal	Low signal	0	0	0	0	0	ITS_903
IV	15737482	15737702	+	9	79.3	220	pseudogene_intron	pseudogene_intron	0	Y105C5A.19	pseudogene	Low signal	Low signal	0	0	0	0	0	ITS_904
IV	15742118	15742338	-	9	79.3	220	pseudogene_intron	pseudogene_intron	0	Y105C5A.20	pseudogene	Low signal	Low signal	0	0	0	0	0	ITS_905
IV	15820515	15820563	-	5	93.8	48	intron	intron	0	daf-38	protein_coding	Low signal	Low signal	0	0	1	0	3	ITS_906
IV	16172767	16173145	-	20	83.4	378	intergenic	ncrna	16	21ur-6997	piRNA	Polycomb	Enhancer	0	0	1	5	13	ITS_907
IV	16257941	16258025	+	6	79.8	84	intron	intron	0	hlh-31	protein_coding	Heterochromatin	Low signal	0	1	0	0	1	ITS_908
IV	16269222	16269294	+	6	83.3	72	intergenic	ncrna	137	21ur-6926	piRNA	Heterochromatin	Heterochromatin	0	0	0	0	0	ITS_909
IV	16333070	16333335	-	7	56.3	265	intron	intron	0	srz-71	protein_coding	Heterochromatin	Heterochromatin	0	0	0	0	0	ITS_910
IV	16659282	16659413	-	5	69	131	intergenic	ncrna	311	21ur-4709	piRNA	Enhancer	Enhancer	0	0	0	3	77	ITS_911
IV	16751445	16751487	-	4	88.1	42	intron	intron	0	Y43D4A.2	protein_coding	Low signal	Low signal	0	0	0	1	9	ITS_912
V	16074	16349	+	8	76.6	275	intergenic	ncrna	2705	B0348.9	ncRNA	Gene body	Gene body	0	0	0	1	3	ITS_913
V	38553	38595	+	4	90.5	42	intron	intron	0	egl-8	protein_coding	Low signal	Gene body	0	0	0	0	1	ITS_914
V	54920	54956	+	4	88.9	36	intron	intron	0	srt-52	protein_coding	Low signal	Low signal	0	0	0	0	0	ITS_915
V	87765	87863	-	7	80.4	98	ncrna	ncrna	0	F56E10.7	ncRNA	Low signal	Low signal	0	0	1	0	1	ITS_916
V	232364	232442	+	6	87.2	78	intron	intron	0	kin-33	protein_coding	Enhancer	Low signal	0	0	0	0	2	ITS_917
V	239425	239473	-	5	91.7	48	intron	intron	0	R02C2.6	protein_coding	Enhancer	Polycomb	0	0	3	0	4	ITS_918
V	248721	248877	-	8	74.1	156	intron	intron	0	oac-39	protein_coding	Heterochromatin	Heterochromatin	0	0	2	1	14	ITS_919
V	365707	365827	+	8	86.7	120	intron	intron	0	mltn-6	protein_coding	Heterochromatin	Polycomb	0	0	0	0	0	ITS_920
V	544670	544745	+	4	84	75	intron	intron	0	C14C6.3	protein_coding	Heterochromatin	Heterochromatin	0	0	0	0	0	ITS_921
V	673174	673424	+	13	69	250	intron	intron	0	sru-25	protein_coding	Heterochromatin	Heterochromatin	0	0	0	0	0	ITS_922
V	729642	729676	+	5	79.5	34	intron	intron	0	srh-2	protein_coding	Heterochromatin	Enhancer	0	0	0	0	7	ITS_923
V	779430	779460	+	4	80	30	intron	intron	0	srbc-59	protein_coding	Polycomb	Polycomb	0	0	0	0	0	ITS_924
V	881173	881359	+	8	80.1	186	intron	intron	0	srg-53	protein_coding	Low signal	Low signal	0	0	0	0	6	ITS_925
V	900068	900324	+	13	77.7	256	intron	intron	0	fmo-5	protein_coding	Polycomb	Polycomb	0	0	8	15	74	ITS_926
V	901898	902152	+	14	76.7	254	intron	intron	0	fmo-5	protein_coding	Polycomb	Polycomb	0	0	2	4	17	ITS_927
V	970089	970161	+	6	81.9	72	ncrna	ncrna	0	Y50D4C.8	ncRNA	Gene body	Enhancer	0	0	1	0	4	ITS_928
V	1047115	1047259	-	12	88.9	144	intron	intron	0	nra-4	protein_coding	Gene body	Gene body	0	0	2	0	2	ITS_929
V	1052673	1052775	-	9	76.9	102	intron	intron	0	K10C9.4	protein_coding	Low signal	Low signal	0	0	0	0	0	ITS_930
V	1055208	1055343	+	8	82.7	135	pseudogene_intron	ncrna	0	K10C9.12	ncRNA	Low signal	Low signal	0	0	0	0	0	ITS_931
V	1107218	1107296	-	5	84.6	78	intergenic	exon	3172	Y50D4B.2	protein_coding	Low signal	Low signal	0	0	0	0	0	ITS_932
V	1112265	1112400	-	10	82.4	135	intergenic	exon	557	Y50D4B.1	protein_coding	Low signal	Low signal	0	0	0	0	0	ITS_933
V	1115588	1115791	+	13	83.5	203	intron	ncrna	0	Y50D4B.8	ncRNA	Low signal	Polycomb	0	0	2	0	9	ITS_934
V	1122551	1122857	-	15	83.3	306	intron	intron	0	Y50D4B.1	protein_coding	Low signal	Low signal	0	0	0	0	0	ITS_935
V	1129471	1129627	+	15	90.4	156	intergenic	3' UTR	119	Y50D4B.1	protein_coding	Low signal	Polycomb	0	0	0	0	0	ITS_936
V	1134183	1134389	-	13	85.3	206	intergenic	5' UTR	190	cpr-5	protein_coding	Polycomb	Polycomb	0	0	1	0	3	ITS_937
V	1140891	1141071	-	11	85.6	180	intergenic	ncrna	0	T21H3.9	ncRNA	Low signal	Low signal	0	0	2	0	3	ITS_938
V	1142351	1142532	-	11	84.5	181	intron	intron	0	cutl-22	protein_coding	Low signal	Low signal	0	0	0	0	1	ITS_939
V	1160800	1161106	-	12	80.8	306	intron	intron	0	T21H3.5	protein_coding	Low signal	Polycomb	0	0	0	0	2	ITS_940
V	1165057	1165475	-	24	81.2	418	intergenic	ncrna	0	T21H3.8	ncRNA	Low signal	Polycomb	0	0	0	0	0	ITS_941
V	1169960	1170068	+	7	88	108	intron	intron	0	ptr-16	protein_coding	Polycomb	Polycomb	0	0	1	0	2	ITS_942
V	1170671	1170973	-	15	81.8	302	intron	intron	0	ptr-16	protein_coding	Polycomb	Polycomb	0	0	1	0	1	ITS_943
V	1222381	1222459	-	7	88.5	78	intergenic	ncrna	1013	mir-8194	miRNA	Low signal	Low signal	0	1	0	0	3	ITS_944
V	1224486	1224806	-	15	81	320	intron	intron	0	madd-2	protein_coding	Enhancer	Gene body	0	0	0	1	4	ITS_945
V	1225380	1225563	-	7	60.3	183	intron	intron	0	madd-2	protein_coding	Enhancer	Gene body	0	0	0	0	2	ITS_946
V	1227230	1227308	-	10	96.2	78	intron	intron	0	madd-2	protein_coding	Enhancer	Gene body	0	0	0	0	0	ITS_947
V	1229958	1230090	+	7	87.1	132	intron	intron	0	madd-2	protein_coding	Enhancer	Enhancer	0	0	0	1	1	ITS_948
V	1230609	1230879	-	20	89.3	270	intron	ncrna	0	C39F7.8	ncRNA	Enhancer	Enhancer	0	0	1	0	5	ITS_949
V	1236677	1236967	-	22	84.7	290	intergenic	ncrna	0	C39F7.6	ncRNA	Enhancer	Enhancer	0	0	1	0	3	ITS_950
V	1242497	1242861	-	22	84.4	364	intergenic	ncrna	5588	C39F7.6	ncRNA	Enhancer	Gene body	0	0	1	0	1	ITS_951
V	1243595	1243721	+	12	89.7	126	intergenic	ncrna	6686	C39F7.6	ncRNA	Enhancer	Enhancer	0	1	2	1	12	ITS_952
V	1249103	1249157	-	5	87	54	intergenic	exon	11307	C39F7.1	protein_coding	Low signal	Low signal	0	0	0	0	0	ITS_953
V	1252298	1252382	+	5	84.5	84	intergenic	exon	8082	C39F7.1	protein_coding	Low signal	Low signal	0	0	0	0	0	ITS_954
V	1266605	1266920	+	17	80	315	intron	intron	0	C39F7.5	protein_coding	Polycomb	Gene body	0	2	1	0	7	ITS_955
V	1270184	1270557	+	14	81.2	373	intergenic	3' UTR	80	C39F7.5	protein_coding	Polycomb	Gene body	0	0	2	2	15	ITS_956
V	1288342	1288430	-	6	85.6	88	intergenic	3' UTR	942	egl-2	protein_coding	Low signal	Low signal	0	0	1	1	5	ITS_957
V	1292860	1293008	-	13	81.2	148	intron	intron	0	F16B3.4	ncRNA	Low signal	Polycomb	0	0	0	0	1	ITS_958
V	1305907	1306166	+	18	87.3	259	intergenic	5' UTR	6575	egl-2	protein_coding	Low signal	Polycomb	0	0	4	0	6	ITS_959
V	1317219	1317458	-	10	70.6	239	intron	intron	0	F16B3.3	protein_coding	Low signal	Low signal	0	0	1	0	1	ITS_960
V	1318553	1318918	-	19	74	365	intergenic	5' UTR	634	F16B3.3	protein_coding	Low signal	Low signal	0	0	0	0	0	ITS_961
V	1320200	1320242	+	4	85.7	42	intergenic	5' UTR	2281	F16B3.3	protein_coding	Low signal	Enhancer	0	0	0	0	0	ITS_962
V	1336433	1336637	-	12	85.3	204	intron	intron	0	Y75B7AL.2	protein_coding	Low signal	Low signal	0	0	0	0	0	ITS_963
V	1338211	1338325	-	10	88.6	114	intron	ncrna	0	Y75B7AL.8	ncRNA	Enhancer	Low signal	0	0	0	0	1	ITS_964
V	1341381	1341633	-	21	88.1	252	intron	intron	0	Y75B7AL.2	protein_coding	Low signal	Low signal	0	0	0	0	3	ITS_965
V	1348197	1348329	-	9	88.6	132	intron	ncrna	0	Y75B7AL.7	ncRNA	Low signal	Low signal	0	0	0	0	1	ITS_966
V	1349449	1349533	+	6	88.1	84	intron	intron	0	Y75B7AL.2	protein_coding	Low signal	Low signal	0	0	0	0	1	ITS_967
V	1357912	1357984	-	4	83.3	72	intron	intron	0	Y75B7AL.2	protein_coding	Low signal	Low signal	0	0	0	0	0	ITS_968
V	1395481	1395678	-	15	87.4	197	intron	intron	0	snt-5	protein_coding	Polycomb	Gene body	0	0	0	0	0	ITS_969
V	1399110	1399247	+	8	84.8	137	intron	intron	0	snt-5	protein_coding	Low signal	Low signal	0	0	0	0	0	ITS_970
V	1412457	1412697	+	15	83.3	240	intergenic	ncrna	0	R12A1.5	ncRNA	Low signal	Low signal	0	0	0	1	2	ITS_971
V	1416100	1416405	-	22	80.8	305	intergenic	ncrna	3398	R12A1.5	ncRNA	Low signal	Low signal	0	0	1	0	3	ITS_972
V	1423357	1423759	-	37	91	402	intron	intron	0	R12A1.3	protein_coding	Polycomb	Polycomb	0	0	1	1	2	ITS_973
V	1438180	1438270	-	8	86.7	90	intergenic	5' UTR	934	R09B5.11	protein_coding	Low signal	Low signal	0	0	0	0	0	ITS_974
V	1438633	1438675	-	5	92.9	42	intergenic	5' UTR	529	R09B5.11	protein_coding	Low signal	Low signal	0	0	0	0	1	ITS_975
V	1460679	1460739	+	4	83.3	60	intron	intron	0	hacd-1	protein_coding	Low signal	Low signal	0	0	0	0	1	ITS_976
V	1477455	1477551	-	7	84.4	96	intron	intron	0	unc-60	protein_coding	Gene body	Gene body	0	0	0	0	0	ITS_977
V	1480405	1480585	-	15	87.8	180	intergenic	3' UTR	823	unc-60	protein_coding	Low signal	Enhancer	0	1	0	0	2	ITS_978
V	1481684	1481924	-	15	83.8	240	intergenic	exon	126	C38C3.4	protein_coding	Low signal	Polycomb	0	0	0	0	1	ITS_979
V	1483212	1483560	+	23	85.9	348	intron	intron	0	C38C3.4	protein_coding	Low signal	Polycomb	0	0	0	1	1	ITS_980
V	1486646	1486736	+	5	86.7	90	intron	intron	0	C38C3.6	protein_coding	Low signal	Low signal	0	0	0	0	0	ITS_981
V	1488037	1488085	-	5	93.8	48	intron	intron	0	C38C3.6	protein_coding	Low signal	Low signal	0	0	1	0	1	ITS_982
V	1490883	1491249	+	13	79.3	366	intron	intron	0	C38C3.6	protein_coding	Low signal	Low signal	0	0	0	0	0	ITS_983
V	1516631	1516823	+	14	88	192	intergenic	peseudogene_exon	1912	K02H11.8	pseudogene	Low signal	Low signal	0	0	0	0	0	ITS_984
V	1542316	1542376	+	5	86.7	60	ncrna	ncrna	0	F52F10.8	ncRNA	Low signal	Low signal	0	0	0	0	0	ITS_985
V	1647864	1647967	+	8	87.5	103	intergenic	exon	136	alh-2	protein_coding	Low signal	Low signal	0	0	0	0	0	ITS_986
V	1661123	1661213	-	7	89	90	pseudogene_intron	pseudogene_intron	0	irld-43	pseudogene	Low signal	Low signal	0	0	0	0	0	ITS_987
V	1662261	1662404	-	11	84.7	143	intergenic	peseudogene_exon	111	irld-43	pseudogene	Low signal	Low signal	0	0	0	0	0	ITS_988
V	1669855	1669989	+	11	84.1	134	intron	intron	0	irld-42	protein_coding	Low signal	Low signal	0	0	0	0	0	ITS_989
V	1702431	1702519	+	7	85.6	88	intron	intron	0	srw-90	protein_coding	Heterochromatin	Heterochromatin	0	0	0	0	1	ITS_990
V	1739152	1739194	+	4	90.5	42	intron	intron	0	srab-25	protein_coding	Low signal	Low signal	0	0	0	0	0	ITS_991
V	1743264	1743420	-	8	69.3	156	intergenic	ncrna	0	ZK697.16	ncRNA	Enhancer	Enhancer	0	0	0	0	2	ITS_992
V	1780653	1780802	-	9	82.8	149	intron	intron	0	F36H9.5	protein_coding	Low signal	Polycomb	0	0	0	0	1	ITS_993
V	1825311	1825419	-	8	89.8	108	intron	intron	0	Y32G9B.1	protein_coding	Gene body	Gene body	0	0	0	0	0	ITS_994
V	1826255	1826420	+	4	48.3	165	intron	intron	0	Y32G9B.1	protein_coding	Enhancer	Low signal	0	0	0	0	6	ITS_995
V	1847090	1847126	+	4	91.7	36	intron	intron	0	T10B5.7	protein_coding	Gene body	Polycomb	0	0	0	0	0	ITS_996
V	1847257	1847355	+	8	84.7	98	intron	intron	0	T10B5.7	protein_coding	Gene body	Polycomb	0	0	0	0	0	ITS_997
V	1848651	1848942	-	16	79.9	291	pseudogene_intron	pseudogene_intron	0	T10B5.2	pseudogene	Gene body	Polycomb	0	0	0	0	1	ITS_998
V	1855786	1856023	+	13	79.5	237	intron	intron	0	T10B5.12	ncRNA	Low signal	Polycomb	0	0	0	0	1	ITS_999
V	1856627	1856873	+	11	78.6	246	intergenic	5' UTR	351	T10B5.10	protein_coding	Low signal	Enhancer	0	0	0	1	2	ITS_1000
V	1926929	1927052	+	5	76.8	123	intergenic	5' UTR	170	T06A1.5	protein_coding	Low signal	Polycomb	0	0	0	0	0	ITS_1001
V	1991045	1991189	-	8	77.6	144	intron	intron	0	tnt-4	protein_coding	Polycomb	Polycomb	0	0	0	0	0	ITS_1002
V	2044234	2044432	+	14	84.9	198	intron	intron	0	Y40B10A.5	protein_coding	Low signal	Polycomb	0	0	0	0	0	ITS_1003
V	2102636	2102953	-	21	78	317	intron	intron	0	F36F12.1	protein_coding	Polycomb	Polycomb	0	0	0	0	0	ITS_1004
V	2279057	2279369	+	12	67.1	312	intron	intron	0	fbxa-137	protein_coding	Low signal	Enhancer	0	0	0	0	0	ITS_1005
V	2289969	2290095	-	9	88.9	126	intron	intron	0	nhr-115	protein_coding	Low signal	Polycomb	0	0	0	0	0	ITS_1006
V	2394217	2394293	-	6	75.6	76	intergenic	exon	70	Y19D10A.16	protein_coding	Gene body	Polycomb	0	0	0	0	1	ITS_1007
V	2394728	2394788	+	5	91.7	60	intron	intron	0	srd-75	protein_coding	Gene body	Polycomb	0	0	2	1	4	ITS_1008
V	2396758	2397003	+	13	77.6	245	intergenic	exon	123	srd-75	protein_coding	Gene body	Polycomb	0	0	0	0	1	ITS_1009
V	2411870	2411954	-	6	86.9	84	intron	intron	0	Y19D10A.1	protein_coding	Polycomb	Polycomb	0	0	0	0	0	ITS_1010
V	2423592	2423806	+	11	82.4	214	intron	intron	0	srd-71	protein_coding	Gene body	Polycomb	0	0	1	2	11	ITS_1011
V	2425779	2425833	-	4	83.3	54	intron	intron	0	srd-71	protein_coding	Polycomb	Polycomb	0	0	0	1	1	ITS_1012
V	2502496	2502572	-	6	75.6	76	intergenic	exon	70	C01B4.6	protein_coding	Gene body	Polycomb	0	0	0	0	1	ITS_1013
V	2503007	2503067	+	5	91.7	60	intron	intron	0	srd-61	protein_coding	Gene body	Polycomb	0	0	1	0	3	ITS_1014
V	2505037	2505282	+	13	77.6	245	intergenic	exon	123	srd-61	protein_coding	Gene body	Polycomb	0	0	0	0	0	ITS_1015
V	2520149	2520233	-	6	86.9	84	intron	intron	0	str-257	protein_coding	Polycomb	Polycomb	0	0	0	0	0	ITS_1016
V	2531871	2532085	+	11	82.4	214	intron	intron	0	srd-72	protein_coding	Gene body	Polycomb	0	0	1	1	8	ITS_1017
V	2534058	2534112	-	4	83.3	54	intron	intron	0	srd-72	protein_coding	Polycomb	Polycomb	0	0	0	2	2	ITS_1018
V	2586181	2586364	-	11	71.4	183	intergenic	5' UTR	273	C29G2.6	protein_coding	Low signal	Low signal	0	0	0	0	0	ITS_1019
V	2588514	2588571	-	4	83.3	57	intergenic	peseudogene_exon	1821	C29G2.2	pseudogene	Low signal	Low signal	0	0	0	0	0	ITS_1020
V	2593196	2593397	+	4	44.4	201	intron	intron	0	irg-3	protein_coding	Low signal	Polycomb	0	0	0	0	5	ITS_1021
V	2608178	2608256	-	6	84.6	78	intergenic	peseudogene_exon	217	F53E10.3	pseudogene	Low signal	Low signal	0	0	0	0	0	ITS_1022
V	2619321	2619387	+	4	81.8	66	intron	intron	0	W02H5.15	ncRNA	Polycomb	Heterochromatin	0	0	0	0	1	ITS_1023
V	2636637	2636679	-	5	92.9	42	intron	intron	0	W02H5.11	protein_coding	Enhancer	Heterochromatin	0	0	0	1	1	ITS_1024
V	2677234	2677402	+	12	85.1	168	intron	intron	0	kel-8	protein_coding	Polycomb	Enhancer	0	0	0	1	1	ITS_1025
V	2682117	2682161	+	5	85.4	44	intron	ncrna	0	W02G9.6	ncRNA	Low signal	Enhancer	0	0	0	0	0	ITS_1026
V	2707439	2708115	-	40	83.1	676	intron	intron	0	C24B9.17	ncRNA	Gene body	Polycomb	0	1	2	1	6	ITS_1027
V	2709424	2709714	-	18	83.7	290	intron	intron	0	C24B9.3	protein_coding	Polycomb	Polycomb	0	0	0	0	0	ITS_1028
V	2712586	2712748	-	17	93.8	162	intron	intron	0	srt-28	protein_coding	Polycomb	Heterochromatin	0	0	0	0	0	ITS_1029
V	2794581	2794725	+	5	81.9	144	intron	intron	0	ketn-1	protein_coding	Heterochromatin	Polycomb	0	0	0	0	0	ITS_1030
V	2824756	2824810	+	4	87	54	intron	intron	0	T03D3.5	protein_coding	Low signal	Low signal	0	0	0	0	1	ITS_1031
V	2825862	2826383	-	24	81.8	521	intron	intron	0	T03D3.5	protein_coding	Gene body	Gene body	0	0	0	8	13	ITS_1032
V	2876083	2876185	-	4	80.4	102	intron	intron	0	F37B4.10	protein_coding	Gene body	Gene body	0	0	0	0	1	ITS_1033
V	2930701	2930772	+	6	86.1	71	intron	intron	0	C31B8.16	protein_coding	Low signal	Low signal	0	0	0	0	0	ITS_1034
V	3230252	3230531	+	15	82.3	279	intergenic	exon	124	K08D9.2	protein_coding	Low signal	Polycomb	0	0	0	0	0	ITS_1035
V	3553961	3554099	+	12	88.4	138	intron	intron	0	T24A6.20	protein_coding	Gene body	Polycomb	0	3	4	0	8	ITS_1036
V	3595484	3595574	+	7	86.7	90	intron	intron	0	srh-212	protein_coding	Polycomb	Heterochromatin	0	0	0	0	0	ITS_1037
V	3596035	3596107	+	4	86.1	72	intron	intron	0	srh-212	protein_coding	Polycomb	Heterochromatin	0	0	1	1	3	ITS_1038
V	3616530	3616626	-	8	86.5	96	intergenic	5' UTR	1979	T22F3.11	protein_coding	Low signal	Low signal	0	0	0	0	0	ITS_1039
V	3641477	3641564	-	5	85.6	87	intergenic	3' UTR	293	F59B1.8	protein_coding	Low signal	Polycomb	0	0	0	0	1	ITS_1040
V	3734625	3734697	+	4	84.7	72	intron	intron	0	Y39H10A.9	ncRNA	Gene body	Polycomb	0	0	0	0	0	ITS_1041
V	3737822	3737959	+	8	83.3	137	intron	intron	0	Y39H10A.4	protein_coding	Enhancer	Enhancer	0	0	1	0	4	ITS_1042
V	3741095	3741215	+	7	85.8	120	intergenic	exon	1517	Y39H10A.5	protein_coding	Gene body	Enhancer	0	0	0	0	1	ITS_1043
V	3804842	3805137	+	12	84.1	295	intron	intron	0	R08F11.4	protein_coding	Low signal	Polycomb	0	0	0	0	0	ITS_1044
V	4026451	4026535	-	4	81	84	intergenic	3' UTR	239	K09D9.1	protein_coding	Low signal	Low signal	0	0	0	0	2	ITS_1045
V	4159840	4159873	+	5	91.7	33	intergenic	exon	512	Y45G5AM.5	protein_coding	Enhancer	Low signal	0	0	0	0	0	ITS_1046
V	4232533	4232679	+	6	59.9	146	intergenic	ncrna	3609	21ur-15336	piRNA	Low signal	Low signal	0	0	0	0	0	ITS_1047
V	4355046	4355259	+	12	82.4	213	intron	intron	0	F32D1.3	protein_coding	Enhancer	Enhancer	0	0	0	1	2	ITS_1048
V	4362239	4362449	-	12	83.3	210	intergenic	exon	272	grl-13	protein_coding	Low signal	Low signal	0	0	0	0	0	ITS_1049
V	4510374	4510769	-	19	81.9	395	intron	intron	0	unc-62	protein_coding	Gene body	Gene body	0	0	0	2	3	ITS_1050
V	4600961	4601180	+	14	78.1	219	intron	ncrna	0	Y61A9LA.13	ncRNA	Polycomb	Polycomb	0	0	0	0	2	ITS_1051
V	4630842	4631127	-	16	83.7	285	intron	intron	0	pmt-2	protein_coding	Gene body	Gene body	0	0	0	0	2	ITS_1052
V	4680120	4680425	-	13	81.9	305	intergenic	5' UTR	1549	K03B4.4	protein_coding	Low signal	Low signal	0	0	0	0	0	ITS_1053
V	4684245	4684415	-	14	82.4	170	intron	intron	0	K03B4.4	protein_coding	Gene body	Polycomb	0	0	0	0	0	ITS_1054
V	4803164	4803236	+	5	87.5	72	intron	ncrna	0	R02F11.8	ncRNA	Low signal	Gene body	0	0	0	0	1	ITS_1055
V	4957772	4957944	+	11	82.9	172	intron	intron	0	str-208	protein_coding	Low signal	Low signal	0	0	0	0	9	ITS_1056
V	4967800	4967855	-	5	89.1	55	intergenic	exon	3914	srsx-9	protein_coding	Promoter	Enhancer	0	0	0	0	0	ITS_1057
V	5358413	5358491	+	4	70.7	78	intergenic	exon	188	nhr-216	protein_coding	Low signal	Low signal	0	0	0	0	0	ITS_1058
V	7771969	7772149	+	9	80.6	180	intron	intron	0	frpr-3	protein_coding	Low signal	Low signal	0	0	0	0	4	ITS_1059
V	14339134	14339206	-	4	77.8	72	intergenic	3' UTR	326	srm-6	protein_coding	Low signal	Low signal	0	0	0	0	0	ITS_1060
V	14696228	14696364	+	5	79	136	intron	intron	0	unc-112	protein_coding	Promoter	Enhancer	0	0	0	0	8	ITS_1061
V	14941970	14942037	+	5	76.1	67	intergenic	3' UTR	95	C30G7.3	protein_coding	Low signal	Low signal	0	0	0	0	0	ITS_1062
V	15344284	15344362	-	4	81	78	intron	intron	0	wrt-8	protein_coding	Low signal	Low signal	0	0	0	0	0	ITS_1063
V	15525756	15526304	+	11	46.8	548	intergenic	exon	3064	srh-276	protein_coding	Polycomb	Polycomb	0	0	0	0	0	ITS_1064
V	15527861	15527971	-	4	65.3	110	intergenic	exon	1397	srh-276	protein_coding	Low signal	Polycomb	0	0	0	0	1	ITS_1065
V	15614322	15614418	+	7	87.5	96	intron	intron	0	str-263	protein_coding	Heterochromatin	Heterochromatin	0	0	0	0	0	ITS_1066
V	15615357	15615458	+	8	87.3	101	intron	intron	0	B0391.3	protein_coding	Heterochromatin	Heterochromatin	0	0	0	0	0	ITS_1067
V	15730715	15730763	-	4	89.6	48	intergenic	exon	15	str-38	protein_coding	Polycomb	Heterochromatin	0	0	0	0	1	ITS_1068
V	16030056	16030320	-	15	81.9	264	intron	intron	0	T10C6.7	protein_coding	Enhancer	Low signal	0	0	0	9	38	ITS_1069
V	16408659	16408705	-	4	85.4	46	intron	intron	0	F26D2.3	protein_coding	Gene body	Heterochromatin	0	0	1	0	7	ITS_1070
V	16446324	16446426	+	7	86.3	102	intron	intron	0	T08G3.6	protein_coding	Low signal	Heterochromatin	0	0	0	0	0	ITS_1071
V	16520839	16520899	+	6	93.3	60	intron	intron	0	srw-34	protein_coding	Low signal	Heterochromatin	0	0	0	0	0	ITS_1072
V	16563595	16563899	+	9	68.5	304	intergenic	3' UTR	90	Y32B12B.4	protein_coding	Gene body	Gene body	0	0	2	5	29	ITS_1073
V	16566399	16566494	+	4	78.8	95	intron	intron	0	sru-45	protein_coding	Low signal	Heterochromatin	0	0	0	0	1	ITS_1074
V	16566725	16566861	+	6	77.1	136	intron	intron	0	sru-45	protein_coding	Low signal	Heterochromatin	0	0	0	0	1	ITS_1075
V	16592982	16593229	+	16	83.9	247	intron	intron	0	cpl-1	protein_coding	Polycomb	Polycomb	0	0	0	0	1	ITS_1076
V	16593988	16594224	+	8	71	236	intron	intron	0	cpl-1	protein_coding	Polycomb	Polycomb	0	0	0	0	7	ITS_1077
V	16736512	16736554	+	4	92.9	42	intron	intron	0	clec-34	protein_coding	Heterochromatin	Heterochromatin	0	0	0	0	1	ITS_1078
V	16743821	16743940	+	7	80.7	119	intron	intron	0	T25E12.6	protein_coding	Promoter	Heterochromatin	0	0	0	4	18	ITS_1079
V	16815292	16815481	-	8	77.1	189	intergenic	5' UTR	85	T20B3.1	protein_coding	Enhancer	Enhancer	0	0	0	0	10	ITS_1080
V	16817767	16817851	-	5	84.5	84	intron	intron	0	T20B3.1	protein_coding	Gene body	Polycomb	0	0	0	1	1	ITS_1081
V	16874707	16874754	+	6	91.7	47	intron	intron	0	srw-23	protein_coding	Heterochromatin	Heterochromatin	0	0	0	0	0	ITS_1082
V	16958119	16958316	-	8	81.9	197	intergenic	exon	128	clec-239	protein_coding	Heterochromatin	Heterochromatin	0	0	0	0	0	ITS_1083
V	17002950	17002998	+	4	79.2	48	intron	intron	0	sri-9	protein_coding	Heterochromatin	Heterochromatin	0	0	0	0	0	ITS_1084
V	17242201	17242296	-	5	79.4	95	intron	intron	0	Y68A4B.3	protein_coding	Heterochromatin	Heterochromatin	0	0	0	0	0	ITS_1085
V	17326182	17326347	+	11	85.1	165	intergenic	peseudogene_exon	14	F31E9.8	pseudogene	Heterochromatin	Heterochromatin	0	0	0	1	2	ITS_1086
V	17327728	17327806	-	4	82.1	78	intron	intron	0	sdz-16	protein_coding	Heterochromatin	Heterochromatin	0	0	0	1	1	ITS_1087
V	17470853	17470952	+	5	81.4	99	intron	intron	0	srh-235	protein_coding	Heterochromatin	Heterochromatin	0	0	0	0	0	ITS_1088
V	17483615	17483742	-	6	67.6	127	intergenic	exon	302	srh-111	protein_coding	Heterochromatin	Heterochromatin	0	0	0	0	0	ITS_1089
V	17548538	17548705	+	4	50.6	167	pseudogene_intron	pseudogene_intron	0	fbxa-175	pseudogene	Heterochromatin	Heterochromatin	0	0	0	0	0	ITS_1090
V	17551210	17551316	+	5	71.6	106	intergenic	exon	14	fbxa-176	protein_coding	Heterochromatin	Heterochromatin	0	0	0	0	5	ITS_1091
V	17552593	17552707	-	8	84.2	114	intron	intron	0	C38D9.8	protein_coding	Polycomb	Heterochromatin	0	0	0	0	0	ITS_1092
V	17557062	17557194	-	4	69.6	132	intron	intron	0	fbxa-174	protein_coding	Heterochromatin	Heterochromatin	0	0	0	0	2	ITS_1093
V	17564422	17564569	-	4	67.3	147	intron	intron	0	fbxa-171	protein_coding	Heterochromatin	Heterochromatin	0	0	0	0	8	ITS_1094
V	17710369	17710411	-	4	92.9	42	intron	intron	0	twk-33	protein_coding	Heterochromatin	Heterochromatin	0	0	0	0	1	ITS_1095
V	17717406	17717593	+	11	84.5	187	intergenic	exon	1353	str-77	protein_coding	Low signal	Heterochromatin	0	0	0	0	1	ITS_1096
V	17725643	17726237	-	28	79.1	594	intron	ncrna	0	W06D12.8	ncRNA	Heterochromatin	Heterochromatin	0	0	2	0	2	ITS_1097
V	17727317	17727449	+	7	81.2	132	intron	intron	0	twk-42	protein_coding	Heterochromatin	Heterochromatin	0	0	1	0	4	ITS_1098
V	17728327	17728710	-	15	79.7	383	intron	intron	0	twk-42	protein_coding	Heterochromatin	Heterochromatin	0	0	0	0	0	ITS_1099
V	17743845	17744246	+	19	73.5	401	intron	intron	0	twk-36	protein_coding	Heterochromatin	Heterochromatin	0	0	0	0	0	ITS_1100
V	17859847	17860960	-	22	46	1113	intergenic	3' UTR	409	csn-1	protein_coding	Gene body	Enhancer	0	0	0	0	147	ITS_1101
V	17914811	17914865	+	5	90.7	54	intron	intron	0	dcar-1	protein_coding	Heterochromatin	Polycomb	0	0	0	1	3	ITS_1102
V	17996099	17996506	-	23	74.9	407	intron	intron	0	lon-8	protein_coding	Heterochromatin	Gene body	0	0	0	1	15	ITS_1103
V	18143838	18143950	+	6	69.7	112	intron	intron	0	Y37H2A.14	protein_coding	Heterochromatin	Heterochromatin	0	0	1	0	2	ITS_1104
V	18159966	18160122	+	7	78.2	156	intron	intron	0	C14A6.13	protein_coding	Heterochromatin	Heterochromatin	0	0	0	0	3	ITS_1105
V	18165638	18165673	+	4	91.7	35	intron	intron	0	C14A6.6	protein_coding	Heterochromatin	Heterochromatin	0	1	0	0	1	ITS_1106
V	18166535	18166595	+	4	83.3	60	intron	intron	0	C14A6.6	protein_coding	Heterochromatin	Heterochromatin	0	0	0	0	4	ITS_1107
V	18180207	18180357	+	7	80.7	150	intron	intron	0	C31G12.1	protein_coding	Enhancer	Heterochromatin	0	0	0	4	38	ITS_1108
V	18186318	18186553	+	12	76.2	235	intron	intron	0	C31G12.15	ncRNA	Heterochromatin	Heterochromatin	0	0	0	0	3	ITS_1109
V	18260542	18260584	+	4	81	42	intron	intron	0	R10E8.6	protein_coding	Heterochromatin	Heterochromatin	0	0	0	0	0	ITS_1110
V	18331565	18331595	+	4	90	30	intergenic	5' UTR	386	B0462.4	protein_coding	Heterochromatin	Heterochromatin	0	0	0	0	0	ITS_1111
V	18376477	18376579	+	7	86.3	102	intron	intron	0	Y51A2B.2	protein_coding	Low signal	Heterochromatin	0	0	0	0	0	ITS_1112
V	18409594	18409642	-	4	87.5	48	intron	intron	0	srh-207	protein_coding	Heterochromatin	Heterochromatin	0	0	0	0	1	ITS_1113
V	18515696	18515885	+	16	85.5	189	intergenic	5' UTR	903	hmit-1.1	protein_coding	Low signal	Polycomb	0	0	1	2	9	ITS_1114
V	18535025	18536019	-	28	48.9	994	intron	intron	0	Y51A2D.7	protein_coding	Gene body	Gene body	0	0	0	0	98	ITS_1115
V	18565652	18566072	-	35	83.5	420	intergenic	ncrna	0	Y51A2D.36	ncRNA	Polycomb	Polycomb	0	0	0	0	1	ITS_1116
V	18566410	18566674	+	29	91.3	264	intergenic	ncrna	0	Y51A2D.37	ncRNA	Polycomb	Polycomb	0	0	0	0	0	ITS_1117
V	18581401	18581803	-	35	88.3	402	ncrna	ncrna	0	Y51A2D.33	ncRNA	Low signal	Polycomb	0	0	0	0	1	ITS_1118
V	18588011	18588281	-	26	91.5	270	ncrna	ncrna	0	Y51A2D.24	ncRNA	Enhancer	Polycomb	0	0	0	0	0	ITS_1119
V	18597904	18598054	-	14	92	150	intron	intron	0	grdn-1	protein_coding	Gene body	Enhancer	0	0	0	0	2	ITS_1120
V	18613163	18613505	+	26	87.1	342	intron	ncrna	0	Y51A2D.32	ncRNA	Gene body	Enhancer	0	1	2	8	14	ITS_1121
V	18616283	18616440	-	10	86	157	ncrna	ncrna	0	Y51A2D.29	ncRNA	Gene body	Gene body	0	0	7	2	18	ITS_1122
V	18632672	18632738	-	9	97	66	intron	intron	0	egas-3	protein_coding	Polycomb	Heterochromatin	0	0	0	0	0	ITS_1123
V	18638078	18638396	-	21	85	318	intergenic	exon	87	col-42	protein_coding	Polycomb	Polycomb	0	0	0	0	3	ITS_1124
V	18639703	18639871	+	15	89.3	168	intergenic	3' UTR	115	col-42	protein_coding	Polycomb	Polycomb	0	0	1	1	10	ITS_1125
V	18723063	18723177	-	6	76.7	114	pseudogene_intron	pseudogene_intron	0	Y17D7C.3	pseudogene	Promoter	Gene body	0	0	1	9	32	ITS_1126
V	18733950	18734249	+	23	82.7	299	intron	intron	0	scl-20	protein_coding	Heterochromatin	Heterochromatin	0	0	0	0	0	ITS_1127
V	18751647	18751787	-	9	88.2	140	intron	intron	0	clec-253	protein_coding	Heterochromatin	Heterochromatin	0	0	0	0	2	ITS_1128
V	18762914	18763047	-	8	84.2	133	intron	ncrna	0	F11D11.20	ncRNA	Heterochromatin	Heterochromatin	0	0	0	0	1	ITS_1129
V	18782204	18782276	+	7	87.5	72	pseudogene_intron	pseudogene_intron	0	Y17D7B.7	pseudogene	Low signal	Polycomb	0	0	0	1	2	ITS_1130
V	18797536	18797737	-	10	60.8	201	intron	intron	0	nhr-170	protein_coding	Low signal	Polycomb	0	0	0	0	1	ITS_1131
V	18883373	18883777	-	8	47.1	404	intron	intron	0	emb-4	protein_coding	Gene body	Gene body	0	0	0	0	43	ITS_1132
V	18899893	18900071	+	5	49.5	178	intron	intron	0	nhr-243	protein_coding	Gene body	Gene body	0	0	0	0	1	ITS_1133
V	18909693	18909963	-	17	86.3	270	intergenic	5' UTR	2075	cyp-42A1	protein_coding	Low signal	Polycomb	0	0	0	0	1	ITS_1134
V	18983186	18983458	+	5	43.5	272	intron	intron	0	mrps-35	protein_coding	Gene body	Gene body	0	0	0	0	10	ITS_1135
V	19208015	19208297	+	19	83.3	282	intron	intron	0	T26H2.15	ncRNA	Polycomb	Heterochromatin	0	0	0	0	0	ITS_1136
V	19229045	19229135	+	5	85.6	90	intergenic	peseudogene_exon	221	str-81	protein_coding	Polycomb	Heterochromatin	0	0	0	1	3	ITS_1137
V	19229339	19229651	+	24	87.8	312	intergenic	peseudogene_exon	515	str-81	protein_coding	Polycomb	Polycomb	0	0	1	2	5	ITS_1138
V	19231122	19231564	+	28	84.5	442	intron	intron	0	sqst-3	protein_coding	Polycomb	Heterochromatin	0	1	0	3	8	ITS_1139
V	19232599	19232815	-	16	89.4	216	pseudogene_intron	pseudogene_intron	0	T26H2.12	pseudogene	Polycomb	Heterochromatin	0	1	1	0	3	ITS_1140
V	19397990	19398158	+	7	78.5	168	intron	intron	0	C25F9.13	protein_coding	Heterochromatin	Heterochromatin	0	0	0	0	0	ITS_1141
V	19430643	19430813	+	4	72.6	170	intron	intron	0	srw-85	protein_coding	Heterochromatin	Heterochromatin	0	0	0	0	1	ITS_1142
V	19502527	19502942	+	39	84.5	415	intergenic	exon	169	Y43F8B.3	protein_coding	Polycomb	Polycomb	0	1	0	0	2	ITS_1143
V	19510296	19510713	+	24	82.5	417	intron	intron	0	Y43F8B.3	protein_coding	Heterochromatin	Heterochromatin	0	0	1	0	2	ITS_1144
V	19512673	19512805	+	11	87.1	132	intron	intron	0	phy-4	protein_coding	Heterochromatin	Heterochromatin	0	0	1	0	1	ITS_1145
V	19517961	19518331	+	29	86.9	370	intron	intron	0	Y43F8B.3	protein_coding	Heterochromatin	Heterochromatin	0	0	0	1	4	ITS_1146
V	19528616	19528790	+	24	96	174	intron	intron	0	Y43F8B.2	protein_coding	Enhancer	Polycomb	0	0	0	1	2	ITS_1147
V	19543553	19543905	-	23	77.9	352	intron	intron	0	Y43F8B.1	protein_coding	Polycomb	Polycomb	0	1	0	1	2	ITS_1148
V	19591639	19591863	-	4	39.8	224	intron	intron	0	kcnl-1	protein_coding	Low signal	Polycomb	0	0	0	0	0	ITS_1149
V	19618565	19618693	+	4	49	128	intron	intron	0	Y43F8C.3	protein_coding	Gene body	Gene body	0	0	0	0	0	ITS_1150
V	19664628	19664904	-	13	85.5	276	intergenic	peseudogene_exon	425	Y43F8C.t7	pseudogene	Low signal	Polycomb	0	0	0	0	0	ITS_1151
V	19718305	19718335	+	4	96.7	30	intergenic	3' UTR	1202	Y43F8C.17	protein_coding	Heterochromatin	Low signal	0	0	0	0	0	ITS_1152
V	19718738	19718936	+	14	85.4	198	intergenic	3' UTR	1635	Y43F8C.17	protein_coding	Heterochromatin	Low signal	0	0	0	1	1	ITS_1153
V	19722426	19722498	-	5	87.5	72	ncrna	ncrna	0	Y116F11A.8	ncRNA	Gene body	Enhancer	0	0	0	0	0	ITS_1154
V	19723336	19723366	+	5	100	30	intergenic	ncrna	223	Y116F11A.9	ncRNA	Gene body	Enhancer	1	0	0	0	1	ITS_1155
V	19740679	19740829	-	6	82	150	intron	intron	0	W04E12.2	protein_coding	Enhancer	Heterochromatin	0	0	0	0	0	ITS_1156
V	19745340	19745448	-	5	85.2	108	intron	intron	0	W04E12.4	protein_coding	Heterochromatin	Heterochromatin	0	0	2	1	3	ITS_1157
V	19747101	19747500	-	22	82.7	399	intron	ncrna	0	W04E12.12	ncRNA	Heterochromatin	Heterochromatin	0	0	0	0	4	ITS_1158
V	19749315	19749502	-	7	63.9	187	intron	intron	0	clec-49	protein_coding	Heterochromatin	Heterochromatin	0	0	0	0	4	ITS_1159
V	19757705	19758176	-	27	74.2	471	intron	ncrna	0	W04E12.13	ncRNA	Heterochromatin	Heterochromatin	0	0	0	0	2	ITS_1160
V	19789445	19789614	+	9	82.2	169	intergenic	3' UTR	102	clec-258	protein_coding	Heterochromatin	Heterochromatin	0	0	0	0	3	ITS_1161
V	19798815	19799013	-	14	85.4	198	intron	ncrna	0	Y116F11B.21	ncRNA	Heterochromatin	Heterochromatin	0	1	2	0	4	ITS_1162
V	19801653	19801776	-	10	85.7	123	ncrna	ncrna	0	Y116F11B.23	ncRNA	Heterochromatin	Heterochromatin	0	0	0	0	1	ITS_1163
V	19820126	19820473	+	18	77.2	347	intergenic	3' UTR	94	Y116F11B.17	protein_coding	Polycomb	Heterochromatin	0	0	0	0	1	ITS_1164
V	19827438	19827852	-	28	78.8	414	intron	ncrna	0	Y116F11B.22	ncRNA	Heterochromatin	Heterochromatin	0	0	0	0	1	ITS_1165
V	19828347	19828779	-	27	82.6	432	intron	intron	0	pcp-4	protein_coding	Heterochromatin	Heterochromatin	0	0	1	0	1	ITS_1166
V	19829323	19829668	+	24	86	345	intron	intron	0	pcp-4	protein_coding	Heterochromatin	Heterochromatin	0	0	0	0	1	ITS_1167
V	19863562	19864766	-	26	44.9	1204	intron	intron	0	Y116F11B.9	protein_coding	Low signal	Heterochromatin	0	0	0	0	19	ITS_1168
V	19996803	19997352	-	21	75	549	intron	intron	0	unc-51	protein_coding	Gene body	Gene body	0	0	1	0	4	ITS_1169
V	19998214	19998552	-	20	84.3	338	intron	intron	0	unc-51	protein_coding	Gene body	Gene body	0	1	0	0	3	ITS_1170
V	20001452	20001801	+	13	66.8	349	intron	intron	0	unc-51	protein_coding	Gene body	Gene body	0	0	0	0	1	ITS_1171
V	20001929	20002042	+	10	83.9	113	intron	intron	0	unc-51	protein_coding	Gene body	Gene body	0	0	0	0	0	ITS_1172
V	20002327	20002387	+	5	91.7	60	intron	intron	0	unc-51	protein_coding	Gene body	Gene body	0	0	0	0	0	ITS_1173
V	20002759	20002879	+	5	85.8	120	intron	intron	0	unc-51	protein_coding	Gene body	Gene body	0	0	0	1	1	ITS_1174
V	20018315	20018651	-	23	87.5	336	ncrna	ncrna	0	Y60A3A.35	ncRNA	Low signal	Polycomb	0	0	0	0	0	ITS_1175
V	20184647	20184724	-	4	87.2	77	intron	intron	0	srz-16	protein_coding	Heterochromatin	Heterochromatin	0	0	0	0	1	ITS_1176
V	20325246	20325282	+	5	94.4	36	intergenic	exon	445	Y38H6A.1	protein_coding	Heterochromatin	Heterochromatin	0	0	0	1	1	ITS_1177
V	20361580	20361717	+	5	52.3	137	intron	intron	0	grd-11	protein_coding	Heterochromatin	Heterochromatin	0	0	0	0	11	ITS_1178
V	20536028	20536106	+	4	75.6	78	intron	intron	0	Y38H6C.15	protein_coding	Enhancer	Polycomb	0	0	0	0	1	ITS_1179
V	20645423	20645508	+	4	76.4	85	intergenic	exon	1067	srxa-15	protein_coding	Enhancer	Polycomb	0	0	3	2	45	ITS_1180
V	20647469	20647672	+	6	65.7	203	intergenic	ncrna	0	Y44A6B.5	ncRNA	Enhancer	Polycomb	0	0	2	1	15	ITS_1181
X	116337	116397	-	4	90	60	intron	intron	0	fbxa-221	protein_coding	Heterochromatin	Low signal	0	0	0	0	0	ITS_1182
X	252625	252658	+	4	65.9	33	pseudogene_intron	pseudogene_intron	0	AC8.1	pseudogene	Heterochromatin	Polycomb	0	0	0	0	10	ITS_1183
X	1101301	1101355	+	4	87	54	intron	intron	0	rme-6	protein_coding	Gene body	Gene body	0	0	0	0	0	ITS_1184
X	1174066	1174164	+	6	74.8	98	intron	intron	0	tmc-1	protein_coding	Polycomb	Gene body	0	0	0	0	1	ITS_1185
X	1217433	1217539	-	5	80.7	106	intron	intron	0	C46H3.2	protein_coding	Gene body	Gene body	0	0	0	0	1	ITS_1186
X	1238606	1238660	+	5	87	54	intron	intron	0	C25G6.3	protein_coding	Polycomb	Polycomb	0	0	0	0	0	ITS_1187
X	1300541	1300703	+	10	85.9	162	intron	intron	0	inso-1	protein_coding	Low signal	Gene body	0	0	0	0	1	ITS_1188
X	1314876	1315002	+	9	84.1	126	intron	intron	0	H42K12.3	protein_coding	Low signal	Gene body	0	0	1	0	2	ITS_1189
X	1330352	1330430	-	6	87.2	78	intergenic	5' UTR	405	F21E9.2	protein_coding	Low signal	Low signal	0	0	0	0	0	ITS_1190
X	1331082	1331175	+	6	79.2	93	intergenic	5' UTR	1135	F21E9.2	protein_coding	Low signal	Low signal	0	0	0	0	1	ITS_1191
X	1467762	1467857	+	8	90.6	95	ncrna	ncrna	0	D1005.9	ncRNA	Low signal	Low signal	0	0	0	0	2	ITS_1192
X	1475208	1475279	+	4	76.4	71	intergenic	peseudogene_exon	1121	D1005.t1	pseudogene	Low signal	Low signal	0	0	0	0	0	ITS_1193
X	1479020	1479098	-	5	85.9	78	intergenic	5' UTR	443	acly-1	protein_coding	Gene body	Gene body	0	0	0	4	4	ITS_1194
X	1490591	1490633	+	5	92.9	42	intron	intron	0	F09E10.5	protein_coding	Low signal	Gene body	0	0	0	0	0	ITS_1195
X	1491450	1491492	+	4	85.7	42	intron	intron	0	F09E10.5	protein_coding	Low signal	Gene body	0	0	0	0	0	ITS_1196
X	1496081	1496263	-	13	85.5	182	intron	intron	0	F09E10.6	protein_coding	Low signal	Gene body	0	0	0	0	0	ITS_1197
X	1509782	1509866	-	7	89.3	84	intergenic	3' UTR	651	toca-1	protein_coding	Low signal	Gene body	0	0	0	0	0	ITS_1198
X	1522716	1522808	-	4	52.6	92	intergenic	5' UTR	1229	toca-1	protein_coding	Gene body	Gene body	0	0	0	0	0	ITS_1199
X	1537524	1537596	-	5	83.3	72	intron	intron	0	K06A9.2	protein_coding	Polycomb	Gene body	0	0	0	0	0	ITS_1200
X	1540416	1540806	+	12	65.4	390	intergenic	3' UTR	129	K06A9.2	protein_coding	Polycomb	Polycomb	0	0	0	0	5	ITS_1201
X	1560235	1560462	-	13	82	227	intron	intron	0	K06A9.1	protein_coding	Heterochromatin	Heterochromatin	0	0	1	1	2	ITS_1202
X	1575983	1576334	-	17	79.2	351	intergenic	5' UTR	300	wrt-9	protein_coding	Polycomb	Polycomb	0	0	0	0	0	ITS_1203
X	1585241	1585364	+	5	60.2	123	intron	intron	0	wrt-9	protein_coding	Polycomb	Gene body	0	0	0	0	1	ITS_1204
X	1609445	1609655	-	10	80.5	210	intron	intron	0	H11E01.3	protein_coding	Enhancer	Gene body	0	0	0	0	3	ITS_1205
X	1671873	1671939	+	5	89.4	66	intron	intron	0	tbx-31	protein_coding	Heterochromatin	Heterochromatin	0	0	0	0	1	ITS_1206
X	1687054	1687114	-	4	83.3	60	intergenic	3' UTR	671	meg-4	protein_coding	Heterochromatin	Heterochromatin	0	0	0	0	0	ITS_1207
X	1730956	1731131	+	9	67.4	175	intron	intron	0	dgn-3	protein_coding	Low signal	Heterochromatin	0	0	0	0	0	ITS_1208
X	1777634	1777694	+	8	91.7	60	intron	intron	0	elc-2	protein_coding	Heterochromatin	Heterochromatin	0	0	1	1	6	ITS_1209
X	1834572	1834650	-	4	83.5	78	intron	intron	0	T26C11.3	protein_coding	Polycomb	Heterochromatin	0	0	0	0	0	ITS_1210
X	1836314	1836698	-	15	78.9	384	intron	intron	0	T26C11.2	protein_coding	Polycomb	Heterochromatin	0	0	1	3	12	ITS_1211
X	1836806	1837208	-	17	79.9	402	intron	intron	0	T26C11.2	protein_coding	Polycomb	Polycomb	0	0	0	0	3	ITS_1212
X	1850618	1850894	+	7	66.4	276	intron	intron	0	ceh-21	protein_coding	Gene body	Gene body	0	0	0	0	0	ITS_1213
X	2128185	2128227	+	5	70.8	42	intron	intron	0	F53B1.10	ncRNA	Polycomb	Gene body	0	0	0	0	0	ITS_1214
X	2563175	2563241	+	8	95.5	66	intron	intron	0	F52H2.6	protein_coding	Low signal	Gene body	0	0	0	0	0	ITS_1215
X	2751006	2751060	+	4	83.3	54	intergenic	ncrna	1804	F25H10.8	ncRNA	Low signal	Gene body	0	0	0	1	6	ITS_1216
X	3761278	3761314	+	4	88.9	36	intron	intron	0	T14G12.11	protein_coding	Polycomb	Polycomb	0	0	0	0	0	ITS_1217
X	7823413	7823620	-	4	39.7	207	ncrna	ncrna	0	R03G5.8	ncRNA	Promoter	Promoter	0	0	0	0	58	ITS_1218
X	13463313	13463370	+	4	90	57	intron	intron	0	F02D10.2	protein_coding	Low signal	Low signal	0	0	0	0	1	ITS_1219
X	14721712	14721831	+	8	83.3	119	intron	intron	0	F33C8.2	protein_coding	Low signal	Gene body	0	0	0	0	0	ITS_1220
X	15122366	15122474	-	7	83.3	108	intron	intron	0	unc-7	protein_coding	Low signal	Gene body	0	0	0	0	0	ITS_1221
X	15421712	15421868	+	10	85.9	156	intron	intron	0	F39D8.3	protein_coding	Low signal	Gene body	0	0	1	0	1	ITS_1222
X	15828686	15828900	-	14	80.8	214	intron	ncrna	0	Y7A5A.17	ncRNA	Low signal	Low signal	0	0	0	0	2	ITS_1223
X	15910102	15910523	-	18	73.1	421	intergenic	exon	114	npr-33	protein_coding	Low signal	Polycomb	0	0	3	0	4	ITS_1224
X	17509747	17509829	-	6	83.3	82	intergenic	5' UTR	8615	nhr-1	protein_coding	Enhancer	Gene body	0	0	0	0	0	ITS_1225
X	17527653	17527730	+	5	75.6	77	3' UTR	3' UTR	0	nhr-1	protein_coding	Polycomb	Gene body	0	0	1	25	173	ITS_1226
X	17573656	17573704	-	4	87.5	48	intergenic	ncrna	1597	F39B3.4	ncRNA	Low signal	Low signal	0	0	0	0	0	ITS_1227
X	17578020	17578200	+	10	82.8	180	intergenic	exon	491	F39B3.3	protein_coding	Low signal	Low signal	0	0	0	3	6	ITS_1228
X	17632897	17632933	+	4	91.7	36	intron	intron	0	H18N23.2	protein_coding	Enhancer	Gene body	0	0	0	1	2	ITS_1229

## Sheet: biggsae
chromosome	start	end	width	strand	count	score	feature	ID
cb25.NA_007	54003	54318	315	-	4	33.3	intergenic	cbITS_1
cb25.NA_022	21220	21475	255	-	7	48.1	intron	cbITS_2
cb25.NA_022	29371	29705	334	-	18	51	intron	cbITS_3
cb25.NA_022	30118	30634	516	-	13	50.5	intron	cbITS_4
cb25.NA_033	21554	21975	421	+	8	43	intron	cbITS_5
cb25.NA_041	5013	5151	138	+	4	47.1	intron	cbITS_6
cb25.NA_041	6705	6891	186	-	6	54.8	intron	cbITS_7
cb25.NA_053	1256	1461	205	-	4	40.7	intron	cbITS_8
cb25.NA_067	16418	16840	422	-	12	52.2	intergenic	cbITS_9
cb25.NA_108	292	348	56	+	4	80.4	intergenic	cbITS_10
cb25.NA_108	2817	2900	83	-	4	71.4	intergenic	cbITS_11
cb25.NA_176	1781	1957	176	+	7	55.5	intron	cbITS_12
cb25.NA_176	7933	8215	282	+	7	52.9	intron	cbITS_13
cb25.NA_176	10387	10458	71	+	4	60.5	intron	cbITS_14
cb25.NA_176	10908	11054	146	-	4	43.9	intron	cbITS_15
cb25.NA_176	15621	15723	102	+	4	50	intron	cbITS_16
cb25.NA_176	45353	45754	401	-	5	40.6	intergenic	cbITS_17
cb25.NA_204	2393	3015	622	+	13	44.1	intergenic	cbITS_18
cb25.NA_211	15538	16118	580	+	13	45.3	intron	cbITS_19
cb25.NA_236	9819	10079	260	+	25	79.6	intergenic	cbITS_20
cb25.NA_245	2434	3983	1549	+	67	53.6	intron	cbITS_21
cb25.NA_245	4425	4630	205	+	5	53.6	intron	cbITS_22
cb25.NA_245	4865	5459	594	-	18	54.1	intron	cbITS_23
cb25.NA_245	7597	8317	720	+	22	53.1	intron	cbITS_24
cb25.NA_289	5307	5864	557	+	59	84.4	intergenic	cbITS_25
cb25.NA_331	2275	2554	279	+	12	51.2	intergenic	cbITS_26
cb25.NA_370	2084	2193	109	-	17	99.1	intergenic	cbITS_27
cb25.NA_403	1515	1554	39	-	4	58.8	intergenic	cbITS_28
cb25.NA_430	1283	1582	299	-	4	38.2	intergenic	cbITS_29
I	234699	234836	137	-	4	48.6	exonutr3	cbITS_30
I	277645	277910	265	+	4	39.2	intron	cbITS_31
I	849658	850156	498	-	16	59.7	intron	cbITS_32
I	952315	952462	147	+	4	39.7	intron	cbITS_33
I	985889	986042	153	+	4	53.1	intron	cbITS_34
I	1013197	1013334	137	-	5	40.3	intron	cbITS_35
I	1019666	1019820	154	-	6	57.3	intron	cbITS_36
I	1120137	1120558	421	+	12	51.7	intron	cbITS_37
I	1120792	1120958	166	+	6	53	intron	cbITS_38
I	1143356	1143515	159	+	5	44.7	intron	cbITS_39
I	1304794	1305005	211	+	4	36.8	intron	cbITS_40
I	1439657	1439821	164	-	4	45.9	intron	cbITS_41
I	1624822	1624977	155	+	4	49.5	intron	cbITS_42
I	1849625	1849787	162	-	5	58.5	intergenic	cbITS_43
I	1859296	1859610	314	+	4	38.6	intron	cbITS_44
I	1861112	1861296	184	-	4	42.1	intron	cbITS_45
I	1889027	1889180	153	+	4	49.1	intron	cbITS_46
I	1903107	1903317	210	+	4	34.3	intron	cbITS_47
I	1948069	1949018	949	-	46	54.3	intron	cbITS_48
I	2726828	2726949	121	-	4	56.9	intron	cbITS_49
I	2745641	2745829	188	+	5	52.4	intron	cbITS_50
I	7338086	7338371	285	+	4	37.8	intron	cbITS_51
I	10967615	10967821	206	+	4	41.4	intron	cbITS_52
I	11104800	11104910	110	+	4	41	intron	cbITS_53
I	11163011	11163222	211	+	4	43	intron	cbITS_54
I	11757539	11757647	108	-	4	49.2	intron	cbITS_55
I	12026832	12027143	311	+	4	43	intron	cbITS_56
I	12190798	12191051	253	+	4	39.6	intron	cbITS_57
I	12191886	12192190	304	-	4	44.4	intron	cbITS_58
I	12270354	12270871	517	+	15	54.6	intron	cbITS_59
I	12272869	12273144	275	+	5	41.7	intron	cbITS_60
I	12290031	12290471	440	-	11	45.5	intergenic	cbITS_61
I	12294491	12294655	164	+	4	40.6	intron	cbITS_62
I	12386675	12386933	258	+	7	43.2	intron	cbITS_63
I	12403014	12403212	198	-	4	50.5	intron	cbITS_64
I	12404906	12404986	80	-	4	49.5	intron	cbITS_65
I	12408485	12408555	70	-	4	53.7	intron	cbITS_66
I	12417407	12417613	206	-	5	52.2	intron	cbITS_67
I	12585154	12585270	116	-	4	48.8	intron	cbITS_68
I	12656812	12657007	195	+	6	52.3	intron	cbITS_69
I	12668328	12669235	907	-	23	40.7	intron	cbITS_70
I	12710312	12710818	506	-	7	44.3	intron	cbITS_71
I	12780570	12780770	200	+	6	45.8	intron	cbITS_72
I	12781637	12782011	374	+	11	48.9	intron	cbITS_73
I	12832302	12832661	359	+	12	48.4	intergenic	cbITS_74
I	12985239	12985619	380	+	20	43.8	intron	cbITS_75
I	12986260	12986601	341	+	10	49.8	intron	cbITS_76
I	12987704	12987996	292	+	6	41.7	intron	cbITS_77
I	12989673	12989790	117	-	4	52.8	intron	cbITS_78
I	13101335	13101497	162	-	4	53.9	intron	cbITS_79
I	13103375	13103685	310	+	8	51.3	intron	cbITS_80
I	13199750	13199885	135	+	4	39.9	intron	cbITS_81
I	13204254	13204579	325	-	6	48.2	intron	cbITS_82
I	13204840	13205087	247	-	6	48.2	intron	cbITS_83
I	13209495	13209564	69	+	4	46.3	intron	cbITS_84
I	13221982	13222130	148	+	5	50	intron	cbITS_85
I	13350602	13350672	70	-	4	34.2	intron	cbITS_86
I	13486452	13486562	110	-	4	52.2	intron	cbITS_87
I	13486935	13487443	508	-	18	52.7	intron	cbITS_88
I	13487963	13488480	517	+	15	54.5	intron	cbITS_89
I	13491437	13491574	137	+	5	48.8	intron	cbITS_90
I	13492327	13492548	221	+	11	49.6	intron	cbITS_91
I	13828232	13828544	312	+	6	50.1	intron	cbITS_92
I	13853180	13853362	182	-	5	49.8	intron	cbITS_93
I	13857453	13857682	229	+	5	43.4	intron	cbITS_94
I	13863898	13864100	202	-	9	53.5	intron	cbITS_95
I	14636741	14636820	79	-	4	60.4	intron	cbITS_96
I	15144966	15145268	302	+	5	43	intron	cbITS_97
I	15247113	15247364	251	-	18	80.1	intergenic	cbITS_98
II	418412	418570	158	-	4	42.9	intron	cbITS_99
II	448144	448169	25	+	4	71.4	intron	cbITS_100
II	578994	579255	261	-	10	46.7	intron	cbITS_101
II	586127	586393	266	-	6	37.4	intergenic	cbITS_102
II	586948	587209	261	+	10	46.7	intron	cbITS_103
II	601690	601833	143	+	5	47.9	intron	cbITS_104
II	620717	620916	199	-	6	54	intron	cbITS_105
II	805105	805279	174	+	7	59.5	intron	cbITS_106
II	806519	806595	76	+	4	63.3	intron	cbITS_107
II	1005118	1005398	280	+	6	47.2	intron	cbITS_108
II	1005887	1006016	129	+	5	51.4	intron	cbITS_109
II	1044877	1045232	355	-	12	50.9	intron	cbITS_110
II	1361396	1361925	529	+	24	53.3	intron	cbITS_111
II	1367695	1367764	69	+	4	56.2	intron	cbITS_112
II	2249344	2249506	162	+	5	39	intergenic	cbITS_113
II	2458561	2458819	258	-	4	46.6	intron	cbITS_114
II	2551346	2551501	155	+	4	42.7	intron	cbITS_115
II	2780216	2780468	252	-	5	42.8	intron	cbITS_116
II	3292489	3292634	145	+	4	50	intergenic	cbITS_117
II	3489384	3489442	58	+	4	50	intron	cbITS_118
II	3658711	3658855	144	-	4	47.4	intron	cbITS_119
II	4858952	4859209	257	+	4	39.6	intron	cbITS_120
II	5419577	5419878	301	-	4	34.8	intron	cbITS_121
II	10559362	10559427	65	-	4	71.4	intron	cbITS_122
II	11132325	11132636	311	+	4	39.2	intergenic	cbITS_123
II	12129230	12129486	256	-	5	40.7	intron	cbITS_124
II	12181761	12181869	108	+	4	45.7	intron	cbITS_125
II	12566623	12567207	584	-	11	40.6	intron	cbITS_126
II	12678603	12678795	192	-	4	43.5	intergenic	cbITS_127
II	12688037	12688327	290	+	4	36.6	intergenic	cbITS_128
II	12776134	12776344	210	-	4	42.8	intron	cbITS_129
II	12820083	12820289	206	+	4	40	intron	cbITS_130
II	12978723	12978931	208	+	5	34.7	intron	cbITS_131
II	13161365	13161622	257	+	4	38.2	intron	cbITS_132
II	13802890	13803001	111	-	4	42.9	intron	cbITS_133
II	14131414	14131667	253	+	5	43.5	intron	cbITS_134
II	14607996	14608747	751	+	15	48.4	intron	cbITS_135
II	14728887	14728986	99	-	4	55.4	intron	cbITS_136
II	14729107	14729260	153	-	5	51.6	intron	cbITS_137
II	14747195	14747337	142	+	5	57.8	intron	cbITS_138
II	14873516	14874167	651	+	29	55	intron	cbITS_139
II	14875958	14876481	523	+	13	48.4	intron	cbITS_140
II	14881104	14881316	212	+	8	51.2	intron	cbITS_141
II	14881427	14881847	420	+	12	50.7	intron	cbITS_142
II	14893609	14893636	27	-	4	69	intron	cbITS_143
II	14895122	14895328	206	-	6	52.4	intron	cbITS_144
II	14895535	14895875	340	-	12	55.9	intron	cbITS_145
II	14930425	14930499	74	+	4	50.6	intron	cbITS_146
II	15123924	15124185	261	-	13	50	exonutr5	cbITS_147
II	15124375	15124433	58	+	4	50.7	intron	cbITS_148
II	15124839	15125031	192	+	7	54.1	intron	cbITS_149
II	15125142	15125310	168	+	4	54.3	intron	cbITS_150
II	15126507	15126601	94	+	4	56.9	intron	cbITS_151
II	15201011	15201119	108	+	4	37.8	intergenic	cbITS_152
II	15346615	15346779	164	+	4	45.6	intron	cbITS_153
II	15384119	15384555	436	+	9	55.5	intron	cbITS_154
II	15479473	15479731	258	-	8	51.6	intron	cbITS_155
II	16215543	16216026	483	-	11	60	intergenic	cbITS_156
III	1292610	1292738	128	+	5	54.1	intron	cbITS_157
III	1292973	1293117	144	-	5	50.6	intron	cbITS_158
III	1341708	1341913	205	+	6	60	intron	cbITS_159
III	1543117	1543488	371	+	8	52.4	intron	cbITS_160
III	1663536	1663907	371	+	8	52.4	intron	cbITS_161
III	1842962	1843094	132	-	4	54.2	intron	cbITS_162
III	1851410	1851554	144	+	4	48.3	intron	cbITS_163
III	1852166	1852309	143	+	4	49.4	intron	cbITS_164
III	1856613	1856692	79	-	4	54.2	intron	cbITS_165
III	1862825	1863024	199	-	7	50.4	intron	cbITS_166
III	1864002	1864154	152	+	5	52.3	intron	cbITS_167
III	1865070	1865233	163	-	6	52.9	intron	cbITS_168
III	1865265	1865399	134	+	4	53.1	intron	cbITS_169
III	2066353	2067066	713	-	24	53.8	intron	cbITS_170
III	2080575	2080981	406	+	13	50.4	intron	cbITS_171
III	2081084	2081334	250	+	8	52.3	intron	cbITS_172
III	2082557	2082759	202	-	8	54	intron	cbITS_173
III	2133407	2133579	172	-	4	47.6	intron	cbITS_174
III	2137519	2138132	613	+	23	47.3	intron	cbITS_175
III	2268873	2269029	156	+	5	50	intron	cbITS_176
III	2269132	2269258	126	+	4	54.8	intron	cbITS_177
III	2269369	2269540	171	+	4	53.2	intron	cbITS_178
III	2311397	2311695	298	-	7	48.1	intron	cbITS_179
III	2441556	2441814	258	-	7	52.2	intergenic	cbITS_180
III	2565028	2565171	143	+	5	52.1	intron	cbITS_181
III	2666971	2667111	140	-	4	51.5	intron	cbITS_182
III	2711948	2712109	161	-	6	44.9	intron	cbITS_183
III	2712134	2712253	119	+	5	53.9	intron	cbITS_184
III	2713161	2713216	55	-	4	61.3	intron	cbITS_185
III	2713459	2713529	70	-	4	53.6	intron	cbITS_186
III	2714622	2714649	27	+	4	62.9	intron	cbITS_187
III	2717087	2717560	473	-	16	52.6	intron	cbITS_188
III	2718660	2718907	247	-	7	49.1	intron	cbITS_189
III	2719217	2719368	151	+	5	52.1	intron	cbITS_190
III	2719998	2720231	233	-	4	50.3	intron	cbITS_191
III	2720822	2720985	163	-	6	54.7	intron	cbITS_192
III	2721306	2721563	257	+	8	50	intron	cbITS_193
III	2741222	2741322	100	-	5	54.3	intergenic	cbITS_194
III	2756614	2756653	39	-	4	58.8	intron	cbITS_195
III	2814710	2815237	527	+	16	50.1	intron	cbITS_196
III	2815699	2816031	332	-	12	53	intron	cbITS_197
III	3180715	3180870	155	-	4	42.3	intron	cbITS_198
III	3188203	3188358	155	-	4	42.3	intron	cbITS_199
III	3275765	3276001	236	-	6	48.3	intron	cbITS_200
III	3276160	3276304	144	-	4	46.2	intron	cbITS_201
III	3277056	3277406	350	-	9	52.1	intron	cbITS_202
III	3277535	3278203	668	-	14	51.2	intron	cbITS_203
III	3278330	3278445	115	-	4	48.6	intron	cbITS_204
III	3510759	3510922	163	+	6	54.7	intron	cbITS_205
III	3512341	3512439	98	-	5	51.8	intron	cbITS_206
III	3517954	3518160	206	+	6	50.8	intron	cbITS_207
III	3782068	3782269	201	-	4	50.2	intron	cbITS_208
III	11234799	11235010	211	+	4	39.6	intron	cbITS_209
III	11356389	11356545	156	-	4	46	intron	cbITS_210
III	11438227	11438368	141	+	4	38.1	intergenic	cbITS_211
III	11575711	11575854	143	+	4	42.6	intron	cbITS_212
III	11779455	11779747	292	+	5	45.9	intron	cbITS_213
III	12383847	12384373	526	-	13	49.7	intron	cbITS_214
III	12759088	12759233	145	+	4	36.6	intron	cbITS_215
III	12771592	12771841	249	+	8	51.7	intron	cbITS_216
III	12810629	12810812	183	+	4	38.3	intron	cbITS_217
III	12855309	12855339	30	+	4	65.7	intron	cbITS_218
III	12859801	12859872	71	-	4	56.6	intron	cbITS_219
III	12869056	12869205	149	-	4	40.1	intron	cbITS_220
III	12878642	12878732	90	+	4	51.6	intron	cbITS_221
III	12879411	12879879	468	+	11	49.1	intron	cbITS_222
III	12880948	12881121	173	+	4	51.5	intron	cbITS_223
III	12881338	12881531	193	+	6	47.9	intron	cbITS_224
III	12883302	12883507	205	+	8	54.1	intron	cbITS_225
III	12883626	12883945	319	+	7	50.4	intron	cbITS_226
III	12884114	12884323	209	+	5	49.4	intron	cbITS_227
III	12885052	12885209	157	+	5	54.2	intron	cbITS_228
III	12885342	12885725	383	+	7	49.4	intron	cbITS_229
III	13059432	13059593	161	+	7	50.9	intron	cbITS_230
III	13378990	13379132	142	-	4	46.4	intergenic	cbITS_231
III	13961604	13961804	200	-	4	44.1	intron	cbITS_232
III	14521706	14522260	554	-	58	85.4	intron	cbITS_233
III	14524513	14524615	102	-	17	100	intergenic	cbITS_234
IV	49402	49774	372	+	8	41.3	intron	cbITS_235
IV	510277	510361	84	+	14	100	intergenic	cbITS_236
IV	659836	660109	273	-	9	53.2	intron	cbITS_237
IV	812235	812390	155	+	4	35.7	intron	cbITS_238
IV	820500	820679	179	+	4	38.7	intron	cbITS_239
IV	821072	821489	417	+	5	42	intron	cbITS_240
IV	1092759	1092828	69	-	5	60.6	intron	cbITS_241
IV	1094305	1094650	345	-	10	52.1	intron	cbITS_242
IV	1394708	1394863	155	-	4	40.1	intron	cbITS_243
IV	1402007	1402318	311	+	4	34.6	intron	cbITS_244
IV	1609349	1609770	421	-	8	43	intron	cbITS_245
IV	1838987	1839145	158	-	4	47.1	intergenic	cbITS_246
IV	2927983	2928237	254	+	4	38.6	intergenic	cbITS_247
IV	2963558	2963797	239	-	4	46.9	intron	cbITS_248
IV	3002888	3003006	118	+	4	41.9	intron	cbITS_249
IV	3003118	3003297	179	+	5	50.2	intron	cbITS_250
IV	3006353	3006669	316	-	5	40.4	intron	cbITS_251
IV	3527754	3527961	207	+	4	41.7	intron	cbITS_252
IV	3531244	3531655	411	-	10	37.3	intron	cbITS_253
IV	3833412	3833564	152	+	7	61	intron	cbITS_254
IV	3833588	3834789	1201	-	41	54.8	intron	cbITS_255
IV	3841398	3841608	210	+	4	36.8	intron	cbITS_256
IV	4775295	4775604	309	+	4	41.1	intron	cbITS_257
IV	4898093	4898301	208	+	4	42.8	intron	cbITS_258
IV	5064769	5064873	104	-	4	46.8	intron	cbITS_259
IV	5173927	5173971	44	-	5	73.6	intergenic	cbITS_260
IV	5314068	5314294	226	+	5	56.2	intron	cbITS_261
IV	6608650	6608756	106	+	4	44.4	intergenic	cbITS_262
IV	11225574	11225697	123	-	4	67.5	intergenic	cbITS_263
IV	11987593	11987806	213	-	9	66.8	intergenic	cbITS_264
IV	12403495	12403805	310	+	6	35.5	intron	cbITS_265
IV	12745609	12745777	168	+	5	50.8	intron	cbITS_266
IV	13385603	13386069	466	-	11	46.3	intron	cbITS_267
IV	13789200	13789410	210	+	4	41.6	intergenic	cbITS_268
IV	13997096	13997380	284	-	10	54.2	intron	cbITS_269
IV	14079054	14079131	77	-	4	53	intergenic	cbITS_270
IV	14248691	14248970	279	-	12	51.2	intron	cbITS_271
IV	14501151	14501317	166	+	4	45.4	intron	cbITS_272
IV	14550201	14550414	213	+	4	40.7	intron	cbITS_273
IV	14919138	14919385	247	-	7	51.8	intron	cbITS_274
IV	14935877	14935956	79	+	6	58.9	intron	cbITS_275
IV	14936274	14936457	183	+	5	50.2	intron	cbITS_276
IV	15092261	15092673	412	+	7	46.8	intron	cbITS_277
IV	15092822	15093063	241	+	6	46.5	intron	cbITS_278
IV	15331958	15332216	258	+	5	53.3	intron	cbITS_279
IV	15345803	15346141	338	-	7	52.2	intergenic	cbITS_280
IV	15346293	15346413	120	-	4	57.9	intergenic	cbITS_281
IV	15349018	15350223	1205	-	35	54	intron	cbITS_282
IV	15352682	15352824	142	+	6	50	intron	cbITS_283
IV	15353310	15353744	434	+	11	54.2	intron	cbITS_284
IV	15359467	15359600	133	+	6	53.2	intron	cbITS_285
IV	15512895	15513244	349	+	7	50.7	intron	cbITS_286
IV	15513397	15513444	47	+	4	68	intron	cbITS_287
IV	15525531	15525743	212	+	6	53.1	intron	cbITS_288
IV	15858867	15859043	176	+	4	41.1	intron	cbITS_289
IV	15980083	15980237	154	+	5	51.2	intergenic	cbITS_290
IV	16049364	16049551	187	-	5	51.9	intron	cbITS_291
IV	16057285	16057518	233	-	6	47.5	intron	cbITS_292
IV	16124101	16124278	177	-	5	48.2	intron	cbITS_293
IV	16124623	16124787	164	-	4	50	intron	cbITS_294
IV	16128562	16128828	266	-	10	52.5	intron	cbITS_295
IV	16128947	16129016	69	-	4	61.8	intron	cbITS_296
IV	16148077	16148136	59	-	4	59.4	intron	cbITS_297
IV	16156690	16156839	149	-	5	52.3	intron	cbITS_298
IV	16303081	16303305	224	+	6	40.7	intron	cbITS_299
IV	16303409	16303545	136	+	5	42.1	intron	cbITS_300
IV	16836613	16837039	426	-	8	48.2	intron	cbITS_301
IV	16882573	16882665	92	+	4	73.5	intergenic	cbITS_302
IV	17089369	17089683	314	-	6	42.2	intron	cbITS_303
IV	17110582	17110612	30	-	5	100	intron	cbITS_304
IV	17112614	17112722	108	-	18	100	intergenic	cbITS_305
IV	17121953	17121983	30	-	5	100	intergenic	cbITS_306
IV	17123116	17123212	96	+	11	84	intergenic	cbITS_307
V	945351	945490	139	+	4	46.4	intron	cbITS_308
V	1209716	1209927	211	-	4	42.1	intron	cbITS_309
V	1298444	1298714	270	+	4	39.5	intron	cbITS_310
V	1669474	1669938	464	-	6	42.1	intron	cbITS_311
V	2496106	2496247	141	-	4	53.8	intron	cbITS_312
V	2497262	2497778	516	+	6	39.7	intron	cbITS_313
V	2587044	2587271	227	-	7	61.3	intron	cbITS_314
V	2687633	2687992	359	+	8	36.5	intergenic	cbITS_315
V	2706363	2706530	167	+	4	46.9	intergenic	cbITS_316
V	2712800	2713427	627	-	7	36	intron	cbITS_317
V	2731841	2732467	626	+	13	41.3	pseudogene_exon	cbITS_318
V	2734944	2735292	348	+	6	42.3	exonintronutr3pseudogene_exon	cbITS_319
V	2775028	2775229	201	-	4	44.1	intron	cbITS_320
V	2902134	2902448	314	+	5	39.8	intron	cbITS_321
V	3285217	3285396	179	+	4	42.5	intron	cbITS_322
V	3419280	3419590	310	+	4	42.6	intron	cbITS_323
V	3670761	3671015	254	+	5	47.3	intron	cbITS_324
V	3837276	3837474	198	-	4	39	intron	cbITS_325
V	3863851	3863960	109	-	4	39.3	intron	cbITS_326
V	3906415	3906725	310	-	4	41.5	intergenic	cbITS_327
V	3962359	3962520	161	-	4	32.3	intergenic	cbITS_328
V	4611076	4611284	208	-	4	47.8	intergenic	cbITS_329
V	4956864	4957074	210	+	6	35.7	intron	cbITS_330
V	5805183	5805315	132	-	5	58.6	intergenic	cbITS_331
V	5808326	5808609	283	-	8	63.8	intron	cbITS_332
V	15488891	15488927	36	-	6	100	intron	cbITS_333
V	15880896	15881204	308	-	5	40.5	intron	cbITS_334
V	15996153	15996398	245	-	4	38.7	pseudogene_exon	cbITS_335
V	16324846	16325057	211	-	4	40	intron	cbITS_336
V	16412966	16413381	415	-	7	44.2	intron	cbITS_337
V	16461159	16461367	208	+	4	39.8	intron	cbITS_338
V	16468964	16469167	203	+	4	40.8	intron	cbITS_339
V	16469371	16469543	172	+	4	41	intron	cbITS_340
V	16824197	16824364	167	-	4	40.1	intron	cbITS_341
V	16831247	16831604	357	+	6	50.2	intron	cbITS_342
V	17351632	17352051	419	+	6	32.7	intron	cbITS_343
V	17352785	17352996	211	+	5	40.4	intron	cbITS_344
V	17374447	17374826	379	+	13	47.9	intron	cbITS_345
V	17375635	17376007	372	-	12	47.9	intron	cbITS_346
V	17390258	17390557	299	+	6	44.4	intron	cbITS_347
V	17868077	17868253	176	-	7	55.5	intron	cbITS_348
V	17870114	17870260	146	-	5	50.3	intron	cbITS_349
V	17870385	17870617	232	-	7	44.8	intron	cbITS_350
V	17870825	17870940	115	-	5	55.6	exonutr5	cbITS_351
V	17874495	17874817	322	+	6	42.4	intron	cbITS_352
V	18175462	18175619	157	+	4	44.4	intergenic	cbITS_353
V	18793985	18794402	417	+	6	40.5	intron	cbITS_354
V	18895509	18895724	215	+	7	54.8	intron	cbITS_355
X	636239	636275	36	+	6	100	intergenic	cbITS_356
X	639486	639534	48	+	8	100	intergenic	cbITS_357
X	673434	673494	60	+	10	100	intergenic	cbITS_358
X	2273609	2273970	361	-	7	40.4	intergenic	cbITS_359
X	3112508	3112563	55	+	4	59.4	intergenic	cbITS_360
X	7211875	7212138	263	-	24	82.4	intergenic	cbITS_361
X	7212364	7212628	264	-	19	79.1	intergenic	cbITS_362
X	8554175	8554428	253	-	5	38	intron	cbITS_363
X	8554552	8555072	520	-	8	37.5	intron	cbITS_364
X	8556808	8557431	623	-	11	38.9	intron	cbITS_365
X	16063887	16064087	200	+	6	40.3	intron	cbITS_366
X	17989857	17989962	105	+	7	61.1	intron	cbITS_367
X	18902466	18902779	313	-	5	43	intergenic	cbITS_368
X	19004618	19005365	747	-	14	39.2	intron	cbITS_369
X	20448002	20448523	521	+	8	44.1	intron	cbITS_370
X	20451051	20451514	463	+	7	43.6	intron	cbITS_371

## Sheet: remanei
chromosome	start	end	width	strand	count	score	feature	ID
Crem_Contig1	225488	225636	148	+	5	62.1	intergenic	crITS_1
Crem_Contig2	1611524	1611787	263	-	8	52.6	intron	crITS_2
Crem_Contig2	2099799	2100135	336	-	12	63.3	intergenic	crITS_3
Crem_Contig2	2100256	2100313	57	-	5	68.7	intergenic	crITS_4
Crem_Contig3	1613553	1613709	156	-	9	72.7	intergenic	crITS_5
Crem_Contig5	9150	9392	242	-	5	25.2	intron	crITS_6
Crem_Contig6	934009	934119	110	-	8	70.4	intergenic	crITS_7
Crem_Contig7	1333583	1333735	152	+	10	70	intergenic	crITS_8
Crem_Contig10	463649	463718	69	+	4	67.1	intergenic	crITS_9
Crem_Contig10	464427	464486	59	+	5	72.7	intergenic	crITS_10
Crem_Contig11	350622	350732	110	+	8	70.4	intergenic	crITS_11
Crem_Contig12	793720	794073	353	-	14	58.6	intergenic	crITS_12
Crem_Contig12	794517	795452	935	-	41	56.8	intergenic	crITS_13
Crem_Contig12	795595	796069	474	-	17	59.7	intergenic	crITS_14
Crem_Contig12	797115	797534	419	-	18	63.2	intergenic	crITS_15
Crem_Contig12	797644	797807	163	-	6	57.3	intergenic	crITS_16
Crem_Contig12	798371	799206	835	-	24	60.4	intergenic	crITS_17
Crem_Contig14	743151	743378	227	+	9	55.1	intron	crITS_18
Crem_Contig14	812965	813245	280	+	8	29.7	intergenic	crITS_19
Crem_Contig14	877973	878129	156	+	7	69.3	intron	crITS_20
Crem_Contig14	1509600	1510020	420	+	23	55.3	exon	crITS_21
Crem_Contig14	1510179	1510824	645	+	45	57.4	intron	crITS_22
Crem_Contig16	117586	117853	267	-	13	60.8	intron	crITS_23
Crem_Contig20	886375	886527	152	+	10	70	intron	crITS_24
Crem_Contig21	906927	907218	291	+	5	43	intron	crITS_25
Crem_Contig22	38358	38834	476	+	6	46.6	intergenic	crITS_26
Crem_Contig22	41909	42711	802	+	9	44.9	intergenic	crITS_27
Crem_Contig22	43923	44665	742	+	9	46.4	intron	crITS_28
Crem_Contig23	328800	329145	345	+	16	63.5	intron	crITS_29
Crem_Contig26	300376	300536	160	-	5	63	intron	crITS_30
Crem_Contig26	301110	301275	165	+	7	67.6	intron	crITS_31
Crem_Contig26	301975	302153	178	+	7	55	intron	crITS_32
Crem_Contig26	303191	303495	304	+	9	54.8	intron	crITS_33
Crem_Contig26	304029	304125	96	-	6	67	intron	crITS_34
Crem_Contig26	324825	324934	109	+	5	71.2	intergenic	crITS_35
Crem_Contig26	332267	332453	186	+	5	57.6	intron	crITS_36
Crem_Contig26	340606	340884	278	+	11	61.9	intron	crITS_37
Crem_Contig26	354278	354466	188	-	5	57.9	intergenic	crITS_38
Crem_Contig29	53898	54146	248	+	7	58.1	intron	crITS_39
Crem_Contig30	370436	370552	116	-	6	64.3	intron	crITS_40
Crem_Contig30	453597	453756	159	+	10	71.2	intron	crITS_41
Crem_Contig30	569898	570098	200	+	5	51.3	intron	crITS_42
Crem_Contig31	97297	98322	1025	+	11	44.9	intergenic	crITS_43
Crem_Contig31	98609	99439	830	+	9	45.1	intergenic	crITS_44
Crem_Contig32	445259	445389	130	-	4	53.8	intergenic	crITS_45
Crem_Contig33	437018	437139	121	-	4	61.5	intron	crITS_46
Crem_Contig33	445613	445738	125	+	6	62.6	intron	crITS_47
Crem_Contig33	453812	453908	96	-	4	54.9	intergenic	crITS_48
Crem_Contig33	677349	677552	203	-	4	45.7	intron	crITS_49
Crem_Contig33	689760	689882	122	-	9	73.9	intergenic	crITS_50
Crem_Contig34	109645	110812	1167	-	69	57.2	intron	crITS_51
Crem_Contig34	110963	112523	1560	-	77	55.9	intron	crITS_52
Crem_Contig34	112783	114103	1320	-	63	51	intron	crITS_53
Crem_Contig34	429026	429184	158	+	8	66.9	intron	crITS_54
Crem_Contig35	447486	447563	77	+	5	72.3	intergenic	crITS_55
Crem_Contig37	430291	430423	132	+	9	75	intron	crITS_56
Crem_Contig38	177870	177991	121	-	5	64.9	intron	crITS_57
Crem_Contig38	685035	685142	107	-	4	56.9	intron	crITS_58
Crem_Contig38	685401	685584	183	-	5	58.6	intron	crITS_59
Crem_Contig39	182377	182510	133	+	4	48.6	intergenic	crITS_60
Crem_Contig39	182738	182920	182	+	5	47.9	intergenic	crITS_61
Crem_Contig39	301552	301767	215	+	8	57.7	intron	crITS_62
Crem_Contig39	378674	378903	229	+	8	69.7	intergenic	crITS_63
Crem_Contig39	418524	418788	264	+	21	72.7	intergenic	crITS_64
Crem_Contig39	554188	554422	234	-	5	39.3	intron	crITS_65
Crem_Contig39	572662	572775	113	-	5	39.7	intergenic	crITS_66
Crem_Contig39	743942	744121	179	-	9	58.6	intron	crITS_67
Crem_Contig41	196505	196760	255	-	5	48.8	intron	crITS_68
Crem_Contig46	77830	78544	714	-	17	56.1	intergenic	crITS_69
Crem_Contig46	105990	106106	116	+	7	63.9	intergenic	crITS_70
Crem_Contig51	421760	422260	500	+	18	55.1	intergenic	crITS_71
Crem_Contig51	422436	422604	168	+	8	56.8	intergenic	crITS_72
Crem_Contig53	519386	519422	36	+	4	69.2	intergenic	crITS_73
Crem_Contig54	423683	424042	359	-	10	56.7	intron	crITS_74
Crem_Contig54	432226	432357	131	-	4	61.7	intron	crITS_75
Crem_Contig54	436193	436503	310	-	10	55.1	intron	crITS_76
Crem_Contig55	55	782	727	+	8	42.6	intergenic	crITS_77
Crem_Contig55	572046	574563	2517	+	26	44.1	intron	crITS_78
Crem_Contig55	576122	576945	823	+	9	44.7	intergenic	crITS_79
Crem_Contig57	236622	236942	320	-	7	57.1	intron	crITS_80
Crem_Contig58	260179	260357	178	+	5	43.7	intron	crITS_81
Crem_Contig58	260459	260742	283	+	10	48	intron	crITS_82
Crem_Contig58	534594	534668	74	+	4	66.7	intron	crITS_83
Crem_Contig59	129341	129451	110	+	4	53.1	intron	crITS_84
Crem_Contig59	173151	173207	56	-	5	62.3	intron	crITS_85
Crem_Contig59	173320	173695	375	-	12	58	intron	crITS_86
Crem_Contig59	199632	199721	89	+	5	57	intron	crITS_87
Crem_Contig59	396897	397127	230	+	4	45.2	intron	crITS_88
Crem_Contig59	409789	409969	180	-	5	58.6	intergenic	crITS_89
Crem_Contig64	58540	58999	459	+	11	53.9	intron	crITS_90
Crem_Contig64	211955	212032	77	+	4	71.8	intergenic	crITS_91
Crem_Contig64	213268	213464	196	+	9	57.4	intergenic	crITS_92
Crem_Contig64	262050	262440	390	+	10	45.9	intergenic	crITS_93
Crem_Contig64	262928	263091	163	-	5	40.4	intergenic	crITS_94
Crem_Contig64	263216	263313	97	-	4	49	intergenic	crITS_95
Crem_Contig64	263605	263681	76	+	4	45.5	intergenic	crITS_96
Crem_Contig64	304729	305019	290	+	5	37.2	intron	crITS_97
Crem_Contig69	350327	350493	166	+	7	68.1	intron	crITS_98
Crem_Contig70	114519	115053	534	-	11	49.4	intron	crITS_99
Crem_Contig70	399160	399488	328	+	10	59.2	intergenic	crITS_100
Crem_Contig71	215507	215744	237	+	10	67.3	intron	crITS_101
Crem_Contig77	120018	120794	776	+	22	50.1	intergenic	crITS_102
Crem_Contig77	121998	122299	301	-	8	47.4	intergenic	crITS_103
Crem_Contig77	132813	133104	291	-	5	48	intergenic	crITS_104
Crem_Contig78	217342	217495	153	-	12	76.6	intron	crITS_105
Crem_Contig79	171157	171532	375	+	17	65.7	intron	crITS_106
Crem_Contig81	101861	102033	172	-	5	61.9	intron	crITS_107
Crem_Contig83	36803	37043	240	-	9	55.5	intron	crITS_108
Crem_Contig83	37414	37474	60	-	4	61.9	intron	crITS_109
Crem_Contig83	38092	38174	82	-	5	69.6	intron	crITS_110
Crem_Contig83	55759	55860	101	+	4	59.3	intergenic	crITS_111
Crem_Contig83	163357	163676	319	+	15	59.6	intergenic	crITS_112
Crem_Contig83	166235	166488	253	-	6	51.8	intergenic	crITS_113
Crem_Contig87	12609	12931	322	-	6	40.1	intron	crITS_114
Crem_Contig87	55838	55922	84	+	5	74.7	intergenic	crITS_115
Crem_Contig88	206167	206340	173	+	6	54.5	intergenic	crITS_116
Crem_Contig88	220521	220679	158	-	4	52.2	intergenic	crITS_117
Crem_Contig88	248401	248548	147	-	5	60.8	intergenic	crITS_118
Crem_Contig88	300437	300813	376	+	8	53.8	intron	crITS_119
Crem_Contig90	15977	16024	47	-	4	59.6	intron	crITS_120
Crem_Contig91	305914	306171	257	-	10	52.4	intron	crITS_121
Crem_Contig91	306298	306589	291	-	7	50.7	intron	crITS_122
Crem_Contig91	306608	306678	70	+	4	58.1	intron	crITS_123
Crem_Contig94	275559	276269	710	+	23	55.9	intergenic	crITS_124
Crem_Contig95	102017	102086	69	-	4	72.2	intron	crITS_125
Crem_Contig96	390	676	286	-	6	37.1	intron	crITS_126
Crem_Contig96	198021	198214	193	+	4	48.2	intergenic	crITS_127
Crem_Contig100	171072	171423	351	-	15	54.7	intron	crITS_128
Crem_Contig108	109145	109358	213	+	5	59.8	intron	crITS_129
Crem_Contig109	19525	19738	213	-	6	45.2	intron	crITS_130
Crem_Contig109	265513	265737	224	-	6	53.1	intron	crITS_131
Crem_Contig109	266829	266909	80	+	5	56.5	intron	crITS_132
Crem_Contig109	325649	325736	87	+	4	53.1	intron	crITS_133
Crem_Contig110	26748	27070	322	-	8	47.7	intron	crITS_134
Crem_Contig116	6342	6524	182	+	7	64.3	intron	crITS_135
Crem_Contig116	12032	12138	106	+	4	47.3	intergenic	crITS_136
Crem_Contig116	66258	66537	279	-	10	56.9	intron	crITS_137
Crem_Contig116	71098	71361	263	-	7	52.9	intron	crITS_138
Crem_Contig117	151199	151271	72	-	4	61.8	intergenic	crITS_139
Crem_Contig121	77757	79121	1364	-	79	56	intergenic	crITS_140
Crem_Contig123	34339	34602	263	-	6	52.9	intron	crITS_141
Crem_Contig123	257786	257838	52	+	4	77.8	intron	crITS_142
Crem_Contig125	109553	109595	42	+	5	84.4	intron	crITS_143
Crem_Contig125	190511	190649	138	+	6	52.9	intergenic	crITS_144
Crem_Contig125	190794	190964	170	+	4	46.3	intergenic	crITS_145
Crem_Contig128	3219	3546	327	+	7	50	intergenic	crITS_146
Crem_Contig133	2008	2637	629	-	12	42.5	intergenic	crITS_147
Crem_Contig133	6571	7300	729	-	16	47.3	intron	crITS_148
Crem_Contig133	16749	16890	141	+	6	64.4	exon	crITS_149
Crem_Contig133	106471	106575	104	-	6	72	intron	crITS_150
Crem_Contig133	120665	120829	164	+	6	60.2	intron	crITS_151
Crem_Contig133	138327	138438	111	+	6	63.5	intron	crITS_152
Crem_Contig133	191473	191760	287	+	10	57	intergenic	crITS_153
Crem_Contig138	120281	120335	54	-	5	75.9	intergenic	crITS_154
Crem_Contig138	133610	134342	732	-	49	57	intergenic	crITS_155
Crem_Contig142	111047	111104	57	-	4	73.3	intergenic	crITS_156
Crem_Contig142	129621	129966	345	-	12	56.5	intergenic	crITS_157
Crem_Contig148	3164	3202	38	-	4	63.8	intron	crITS_158
Crem_Contig154	131105	131184	79	-	4	68.2	intergenic	crITS_159
Crem_Contig154	134045	134124	79	-	4	68.2	intergenic	crITS_160
Crem_Contig160	214940	215056	116	+	6	60.1	intergenic	crITS_161
Crem_Contig160	215539	215839	300	-	4	43.8	intergenic	crITS_162
Crem_Contig160	221591	221688	97	+	7	57.8	intron	crITS_163
Crem_Contig160	221810	221956	146	+	4	54.2	intron	crITS_164
Crem_Contig161	42135	42397	262	-	7	47.5	intron	crITS_165
Crem_Contig162	61594	61813	219	-	5	52.1	intron	crITS_166
Crem_Contig162	61931	62145	214	-	8	54.7	intron	crITS_167
Crem_Contig162	159009	159045	36	+	5	91.7	intergenic	crITS_168
Crem_Contig166	1950	2137	187	+	5	47.2	intergenic	crITS_169
Crem_Contig169	126204	127134	930	-	10	45.7	intergenic	crITS_170
Crem_Contig169	127333	127647	314	-	4	46.2	intergenic	crITS_171
Crem_Contig169	127846	128159	313	-	4	46.2	intergenic	crITS_172
Crem_Contig176	178846	179050	204	+	11	71.1	intron	crITS_173
Crem_Contig178	1151	1278	127	+	7	69.1	intergenic	crITS_174
Crem_Contig178	43566	43718	152	-	9	69.4	intergenic	crITS_175
Crem_Contig186	243	542	299	+	13	58.6	intergenic	crITS_176
Crem_Contig186	3323	3393	70	+	4	63.9	intergenic	crITS_177
Crem_Contig186	101512	102250	738	+	17	48.6	intron	crITS_178
Crem_Contig186	102673	102947	274	+	4	41.4	intron	crITS_179
Crem_Contig191	63487	63680	193	-	5	50.7	intron	crITS_180
Crem_Contig197	35398	35467	69	+	6	69.6	intron	crITS_181
Crem_Contig203	85465	85641	176	+	10	68	intergenic	crITS_182
Crem_Contig209	18253	18310	57	+	4	62.5	intergenic	crITS_183
Crem_Contig209	24697	24803	106	-	4	60.3	intergenic	crITS_184
Crem_Contig209	26534	26668	134	-	4	59.7	intron	crITS_185
Crem_Contig209	27238	27623	385	-	9	52.5	intron	crITS_186
Crem_Contig209	71778	71815	37	+	4	64.9	intron	crITS_187
Crem_Contig209	102860	103232	372	+	11	60.8	intron	crITS_188
Crem_Contig210	165730	165809	79	-	6	51.9	intron	crITS_189
Crem_Contig210	166386	166455	69	-	4	59.4	intron	crITS_190
Crem_Contig211	2735	2921	186	+	7	54.5	intergenic	crITS_191
Crem_Contig214	76672	76775	103	-	6	66.1	intergenic	crITS_192
Crem_Contig222	9996	10723	727	-	8	43.8	intergenic	crITS_193
Crem_Contig222	10923	11340	417	-	5	45.2	intergenic	crITS_194
Crem_Contig222	15649	16167	518	+	6	45.1	intergenic	crITS_195
Crem_Contig222	16919	18364	1445	+	15	45	intergenic	crITS_196
Crem_Contig228	107131	107261	130	-	4	61.4	intron	crITS_197
Crem_Contig232	7163	7249	86	-	4	53.8	intergenic	crITS_198
Crem_Contig232	70101	71109	1008	+	32	54.5	intron	crITS_199
Crem_Contig235	75547	75718	171	+	7	60.7	intergenic	crITS_200
Crem_Contig235	76248	76359	111	+	7	73	intergenic	crITS_201
Crem_Contig235	77200	77332	132	+	4	67.8	intron	crITS_202
Crem_Contig235	78013	78161	148	+	8	70.2	intron	crITS_203
Crem_Contig235	101956	102583	627	+	19	42.6	intron	crITS_204
Crem_Contig235	102684	102991	307	+	12	45.7	intron	crITS_205
Crem_Contig236	11914	12120	206	+	6	49.8	intergenic	crITS_206
Crem_Contig236	24299	24456	157	+	4	52.6	intergenic	crITS_207
Crem_Contig238	10981	11317	336	+	9	53.4	intron	crITS_208
Crem_Contig242	40888	41062	174	+	6	46.3	intron	crITS_209
Crem_Contig246	13584	14424	840	+	30	49.9	intron	crITS_210
Crem_Contig246	27596	27770	174	-	9	31	intron	crITS_211
Crem_Contig246	130055	130297	242	+	7	45.8	intron	crITS_212
Crem_Contig246	165165	165283	118	-	5	48.8	intron	crITS_213
Crem_Contig251	75446	75839	393	-	12	56.8	intergenic	crITS_214
Crem_Contig253	84061	84278	217	-	9	63.2	intron	crITS_215
Crem_Contig259	36211	36427	216	+	4	45.1	intron	crITS_216
Crem_Contig259	36548	36730	182	+	4	49.8	intron	crITS_217
Crem_Contig267	63506	64603	1097	+	51	57.3	intergenic	crITS_218
Crem_Contig268	31707	31917	210	-	6	42.5	intron	crITS_219
Crem_Contig273	74595	74667	72	+	4	55.8	intron	crITS_220
Crem_Contig274	62129	62201	72	+	6	75	intergenic	crITS_221
Crem_Contig277	75254	75585	331	-	8	55.1	intron	crITS_222
Crem_Contig277	75689	75830	141	-	5	56.3	intron	crITS_223
Crem_Contig285	19530	19898	368	-	9	47.2	intron	crITS_224
Crem_Contig285	32577	32866	289	-	9	59.7	intron	crITS_225
Crem_Contig285	43194	43300	106	-	5	71.4	intron	crITS_226
Crem_Contig287	16181	16286	105	+	4	53.7	intron	crITS_227
Crem_Contig312	39957	40159	202	-	6	55.4	intron	crITS_228
Crem_Contig317	29267	29559	292	+	8	63.6	intergenic	crITS_229
Crem_Contig317	41021	41150	129	-	6	52.7	intergenic	crITS_230
Crem_Contig323	6	426	420	-	70	100	intergenic	crITS_231
Crem_Contig323	32402	32524	122	-	5	61	intergenic	crITS_232
Crem_Contig326	23840	24095	255	-	8	52.2	intergenic	crITS_233
Crem_Contig348	27052	27106	54	-	5	85.2	intron	crITS_234
Crem_Contig364	2905	3073	168	+	28	100	intergenic	crITS_235
Crem_Contig369	32160	33294	1134	+	12	45.2	intergenic	crITS_236
Crem_Contig396	9710	10056	346	-	7	54.3	intron	crITS_237
Crem_Contig399	712	903	191	+	24	89.7	intergenic	crITS_238
Crem_Contig399	21492	21534	42	+	7	100	intergenic	crITS_239
Crem_Contig399	26759	27627	868	+	97	83.5	intergenic	crITS_240
Crem_Contig408	3787	3928	141	-	5	54.4	intron	crITS_241
Crem_Contig416	22539	22623	84	-	6	61.6	intron	crITS_242
Crem_Contig416	24388	24577	189	-	7	61.5	intron	crITS_243
Crem_Contig416	25553	25673	120	+	7	71.2	intron	crITS_244
Crem_Contig419	3628	3815	187	+	5	45.9	intergenic	crITS_245
Crem_Contig436	10069	10227	158	-	6	65.6	intergenic	crITS_246
Crem_Contig438	18353	18600	247	+	4	34	intron	crITS_247
Crem_Contig456	22088	22230	142	-	5	54.8	intron	crITS_248
Crem_Contig467	1630	1771	141	+	6	52	intergenic	crITS_249
Crem_Contig489	3362	4147	785	+	56	57.1	intergenic	crITS_250
Crem_Contig509	12255	12385	130	-	4	53.8	intron	crITS_251
Crem_Contig556	305	365	60	+	10	100	exon	crITS_252
Crem_Contig556	983	1039	56	+	4	90	intergenic	crITS_253
Crem_Contig556	3224	3266	42	+	7	100	intergenic	crITS_254
Crem_Contig556	3896	3941	45	+	4	91.7	intergenic	crITS_255
Crem_Contig556	5847	5994	147	+	21	94.7	exon	crITS_256
Crem_Contig556	10278	10450	172	+	14	73.1	intergenic	crITS_257
Crem_Contig580	5442	5493	51	+	7	88.9	intergenic	crITS_258
Crem_Contig580	5631	5731	100	+	4	62.3	intergenic	crITS_259
Crem_Contig580	6690	6790	100	+	4	62.3	intergenic	crITS_260
Crem_Contig580	8743	8828	85	+	12	90.6	intergenic	crITS_261
Crem_Contig580	12631	12887	256	+	32	85.6	intergenic	crITS_262
Crem_Contig580	13548	13596	48	+	8	100	intergenic	crITS_263
Crem_Contig634	12584	12636	52	+	4	75.9	intron	crITS_264
Crem_Contig698	4772	5048	276	-	9	52.4	intron	crITS_265
Crem_Contig746	1279	1532	253	-	12	30.4	exon	crITS_266
Crem_Contig778	1589	1727	138	+	4	37.9	exon	crITS_267
Crem_Contig823	1741	1873	132	+	7	31.8	intron	crITS_268
Crem_Contig883	180	2039	1859	+	19	44	intergenic	crITS_269
Crem_Contig883	3096	4130	1034	+	11	42.1	intergenic	crITS_270
Crem_Contig883	5018	5745	727	+	8	42.8	intergenic	crITS_271
Crem_Contig893	6242	6903	661	+	19	50.6	intron	crITS_272
Crem_Contig1042	2391	2540	149	+	4	46.1	intergenic	crITS_273
Crem_Contig1053	6614	6659	45	-	4	91.7	intergenic	crITS_274
Crem_Contig1053	7288	7384	96	-	16	100	intergenic	crITS_275
Crem_Contig1097	4757	5305	548	+	8	37.7	intron	crITS_276
Crem_Contig1158	3610	3682	72	+	12	100	intergenic	crITS_277
Crem_Contig1158	7006	7234	228	+	38	100	intergenic	crITS_278
Crem_Contig1206	6610	6740	130	+	5	43.8	intron	crITS_279
Crem_Contig1262	3465	3549	84	-	14	100	intergenic	crITS_280
Crem_Contig1262	4210	4310	100	-	4	62.3	intergenic	crITS_281
Crem_Contig1262	4448	4517	69	-	10	91.7	intergenic	crITS_282
Crem_Contig1281	7465	7571	106	-	4	57.8	intron	crITS_283
Crem_Contig1293	78	182	104	+	4	32.7	intergenic	crITS_284
Crem_Contig1498	1785	2157	372	-	21	58.2	intergenic	crITS_285
Crem_Contig1506	1170	1215	45	-	4	91.7	intergenic	crITS_286
Crem_Contig1506	4368	4424	56	-	4	90	intergenic	crITS_287
Crem_Contig1506	5042	5168	126	-	21	100	exon	crITS_288
Crem_Contig1821	1973	2060	87	+	4	52.9	intron	crITS_289
Crem_Contig2378	995	1040	45	-	4	91.7	intergenic	crITS_290
Crem_Contig2378	1669	1771	102	-	17	100	intergenic	crITS_291
